# Supplementary material for: Can traditional risk factors explain the higher risk of cardiovascular disease in South Asians compared to Europeans in Norway and New Zealand? Two cohort studies
Source: PubMed Central journal article supplement — BMJ Open. 2017 Dec 6;7(12):e016819. doi: 10.1136/bmjopen-2017-016819 (PMC5728264; doi:10.1136/bmjopen-2017-016819), 2017-12-06
Supplement: bmjopen-2017-016819.draft_revisions.pdf [file bmjopen-2017-016819.draft_revisions.pdf]

# BMJ Open

BMJ Open is committed to open peer review. As part of this commitment we make the peer review history of every article we publish publicly available.

When an article is published we post the peer reviewers' comments and the authors' responses online. We also post the versions of the paper that were used during peer review. These are the versions that the peer review comments apply to.

The versions of the paper that follow are the versions that were submitted during the peer review process. They are not the versions of record or the final published versions. They should not be cited or distributed as the published version of this manuscript.

BMJ Open is an open access journal and the full, final, typeset and author-corrected version of record of the manuscript is available on our site with no access controls, subscription charges or pay-per-view fees (<http://bmjopen.bmj.com>).

If you have any questions on BMJ Open's open peer review process please email [info.bmjopen@bmj.com](mailto:info.bmjopen@bmj.com)

# BMJ Open

## Can traditional risk factors explain the higher risk of cardiovascular disease in South Asians compared to Europeans in Norway and New Zealand? Two cohort studies

|                                 |                                                                                                                                                                                                                                                                                                                                                                                                                                                                                                                                                                                                                                                                                                                                                                                                                                                                                                  |
|---------------------------------|--------------------------------------------------------------------------------------------------------------------------------------------------------------------------------------------------------------------------------------------------------------------------------------------------------------------------------------------------------------------------------------------------------------------------------------------------------------------------------------------------------------------------------------------------------------------------------------------------------------------------------------------------------------------------------------------------------------------------------------------------------------------------------------------------------------------------------------------------------------------------------------------------|
| Journal:                        | <i>BMJ Open</i>                                                                                                                                                                                                                                                                                                                                                                                                                                                                                                                                                                                                                                                                                                                                                                                                                                                                                  |
| Manuscript ID                   | bmjopen-2017-016819                                                                                                                                                                                                                                                                                                                                                                                                                                                                                                                                                                                                                                                                                                                                                                                                                                                                              |
| Article Type:                   | Research                                                                                                                                                                                                                                                                                                                                                                                                                                                                                                                                                                                                                                                                                                                                                                                                                                                                                         |
| Date Submitted by the Author:   | 13-Mar-2017                                                                                                                                                                                                                                                                                                                                                                                                                                                                                                                                                                                                                                                                                                                                                                                                                                                                                      |
| Complete List of Authors:       | Rabanal, Kjersti; Nasjonalt folkehelseinstitutt, Domain for Mental and Physical Health<br>Meyer, Haakon; Norwegian Institute of Public Health, Epidemiology<br>Tell, Grethe; University of Bergen, Department of Global Public Health and Primary Care<br>Igland, Jannicke; Faculty of Medicine and Dentistry, University of Bergen, Global Public Health and Primary Care<br>Pylypchuk, Romana; University of Auckland, Epidemiology and Biostatistics, School of Population Health<br>Mehta, Suneela; University of Auckland, Epidemiology and Biostatistics, School of Population Health<br>Kumar, Bernadette; Oslo University Hospital, Norwegian Center for Minority Health Research<br>Jenum, Anne; University of Oslo,<br>Selmer, Randi; Norwegian Institute of Public Health, Department of Pharmacoepidemiology<br>Jackson, Rod; University of Auckland, Epidemiology and Biostatistics |
| <b>Primary Subject Heading</b>: | Epidemiology                                                                                                                                                                                                                                                                                                                                                                                                                                                                                                                                                                                                                                                                                                                                                                                                                                                                                     |
| Secondary Subject Heading:      | Cardiovascular medicine, Public health                                                                                                                                                                                                                                                                                                                                                                                                                                                                                                                                                                                                                                                                                                                                                                                                                                                           |
| Keywords:                       | cardiovascular disease, risk factors, South Asians, ethnicity, prospective, cohort                                                                                                                                                                                                                                                                                                                                                                                                                                                                                                                                                                                                                                                                                                                                                                                                               |
|                                 |                                                                                                                                                                                                                                                                                                                                                                                                                                                                                                                                                                                                                                                                                                                                                                                                                                                                                                  |

SCHOLARONE™  
Manuscripts

1  
2  
3  
4  
5  
6 **Can traditional risk factors explain the higher risk of cardiovascular disease in South Asians compared to Europeans in Norway and New**  
7 **Zealand? Two cohort studies**  
8

9 Kjersti S Rabanal<sup>a</sup>, Haakon E Meyer<sup>a,b</sup>, Grethe S Tell<sup>c,d</sup>, Jannicke Igland<sup>d</sup>, Romana Pylypchuk<sup>e</sup>, Suneela Mehta<sup>e</sup>, Bernadette Kumar<sup>f</sup>, Anne Karen  
10 Jenum<sup>g</sup>, Randi M Selmer<sup>a</sup>, Rod Jackson<sup>e</sup>  
11

12  
13  
14 <sup>a</sup> Domain for Mental and Physical Health, Norwegian Institute of Public Health, Oslo, Norway

15 <sup>b</sup> Department of Community Medicine, Institute of Health and Society, University of Oslo, Oslo, Norway

16 <sup>c</sup> Domain for Health Data and Digitalisation, Norwegian Institute of Public Health, Bergen, Norway

17 <sup>d</sup> Department of Global Public Health and Primary Care, University of Bergen, Norway

18 <sup>e</sup> School of Population Health, University of Auckland, Auckland, New Zealand

19 <sup>f</sup> Norwegian Center for Minority Health Research, Oslo, Norway

20 <sup>g</sup> Institute of Health and Society, Faculty of Health and Society, University of Oslo, Oslo, Norway  
21  
22  
23  
24  
25  
26  
27  
28

29 **Corresponding author**

30 Kjersti S Rabanal

31 Address: Norwegian Institute of Public Health, P.O. Box 4404, Nydalen, 0403 Oslo, Norway

32 Telephone number: +47 22078118

33 E-mail: [kjersti.stormark.rabanal@fhi.no](mailto:kjersti.stormark.rabanal@fhi.no), [kjersti.rabanal@hotmail.com](mailto:kjersti.rabanal@hotmail.com)  
34  
35

36 Wordcount, abstract: 297

37 Wordcount, manuscript text: 4137  
38  
39

40 Keywords: cardiovascular disease, risk factors, South Asians, ethnicity, prospective, cohort  
41  
42  
43  
44  
45

**ABSTRACT**

**Objectives** The objective was to prospectively examine potential differences in the risk of first cardiovascular disease (CVD) events between South Asians and Europeans living in Norway and New Zealand, and to investigate whether traditional risk factors could explain any differences.

**Methods** We included participants (30-74 years) without prior CVD in a Norwegian (n=16 606) and a New Zealand (n=129 449) cohort. Ethnicity and cardiovascular risk factor information was linked with hospital registry data and cause of death registries to identify subsequent CVD events. We used Cox proportional hazards regression to investigate the relationship between risk factors and subsequent CVD for South Asians and Europeans, and to calculate age-adjusted hazard ratios (HRs) for CVD in South Asians versus Europeans in the two cohorts separately. We sequentially added the major CVD risk factors (blood pressure, lipids, diabetes and smoking) to study their explanatory role in observed ethnic CVD risk differences.

**Results** South Asians had higher total cholesterol (TC)/high density lipoprotein (HDL) ratio and more diabetes at baseline than Europeans, but lower blood pressure and smoking levels. South Asians had increased age-adjusted risk of CVD compared to Europeans (87-92% higher in the Norwegian cohort and 42-75% higher in the New Zealand cohort) and remained with significantly increased risk after adjusting for all major CVD risk factors. Adjusted HRs for South Asians versus Europeans in the Norwegian cohort were 1.57; 95% CI 1.19-2.07 in men and 1.76; 95% CI

1  
2  
3  
4  
5 1.09-2.82 in women. Corresponding figures for the New Zealand cohort were 1.64; 95% CI 1.43-1.88 in men and 1.39; 95% CI 1.11-1.73 in  
6  
7 women.

8  
9  
10 **Conclusion** Differences in TC/HDL ratio and diabetes appear to explain some of the excess risk of CVD in South Asians compared to Europeans.  
11  
12 Preventing dyslipidaemia and diabetes in South Asians may help reduce their excess risk of CVD.  
13  
14

#### 15 16 17 18 19 **Strengths and limitations of this study**

- 20  
21 • This is one of few prospective investigations of cardiovascular disease and its risk factors in South Asian populations living in Western  
22 countries.  
23
- 24  
25 • A special feature is the inclusion of prospective data from two different countries enhancing the external validity of the findings.  
26  
27
- 28  
29 • The two cohorts differed in how participants were recruited and how information about risk factor levels was collected at baseline.  
30
- 31  
32 • A limited number of South Asians in the Norwegian cohort and short follow up time in the New Zealand cohort restricted the statistical  
33 power in our analyses.  
34  
35  
36  
37  
38  
39  
40  
41  
42  
43  
44  
45

## INTRODUCTION

Immigrants from South Asia (countries in the Indian subcontinent such as India, Pakistan, Sri-Lanka and Bangladesh) who have settled in Western countries have increased risk of cardiovascular disease (CVD) compared to their host populations of European origin[1]. This excess risk has been documented in several countries, especially the increased risk of coronary heart disease (CHD)[2-4]. We recently found that South Asian immigrants in Norway had more than two-fold higher risk of acute myocardial infarction (AMI) than ethnic Norwegians and an increased risk of stroke (26% higher in men and 58% higher in women)[5]. Collaborators in New Zealand found a higher risk of CVD in Indians compared to the European New Zealand population[6].

The mechanisms underlying the increased risk of CVD in South Asian populations are mostly unknown[1]. Few studies have examined the prospective relationship between CVD risk factors and subsequent CVD among South Asians[4, 7-9], and there are few cohort studies including ethnic minority groups in Europe[10]. The two large and multinational case-control studies, Interheart[11] and Interstroke,[12] indicate that different populations share the same risk factors and that the relationship between risk factors and CVD is similar in different populations around the world. The Interheart study also concluded that the earlier age of AMI in South Asians can be largely attributed to higher risk factor levels at younger ages[13]. In both Norway and New Zealand, South Asians have been found to have similar or higher mean total cholesterol (TC) to high density lipoprotein (HDL) ratio and higher prevalence of diabetes compared to the European majority populations[14-17]. However, they also have lower levels of smoking (especially in women) and mean systolic blood pressure (SBP) than the European majority

1  
2  
3  
4  
5 populations. Whether the higher risk of CVD among South Asians in Norway and New Zealand is due to higher levels of certain risk factors have  
6  
7 not previously been studied.  
8

9  
10 Due to the dearth of prospective data on the relationship between risk factors and CVD among South Asians, we aimed to prospectively  
11  
12 examine possible differences in the risk of a first CVD event between South Asians and Europeans using cohort studies from Norway and New  
13  
14 Zealand, and to examine whether traditional CVD risk factors could explain such differences. Since the two cohorts differ in several aspects we  
15  
16 do not intend to compare the two cohorts directly, but mainly focus on within-country comparisons.  
17  
18

## 19 20 21 **MATERIAL AND METHODS**

### 22 23 **The New Zealand PREDICT-CVD cohort**

24  
25 We used data from the PREDICT-CVD cohort, collected through use of the PREDICT web-based decision support program in New Zealand for  
26  
27 the assessment and management of CVD risk during primary health care consultations[18]. The study methods and data definitions are  
28  
29 described in detail elsewhere[18, 19]. In short, the software has been integrated with commonly used primary care management systems, and  
30  
31 allows systematically coded CVD risk data to be automatically and anonymously extracted from patients' electronic medical records and  
32  
33 augmented where required by primary care staff[18, 19]. The cardiovascular profile data was subsequently linked, using an encrypted national  
34  
35 health identifier number to national and regional health datasets with information about hospitalisations, deaths, publicly funded drug  
36  
37 dispensing and laboratory test claims and results[19].  
38  
39  
40  
41  
42  
43  
44  
45  
46  
47  
48  
49

1  
2  
3  
4  
5 The PREDICT software is used in around 35% of New Zealand primary care practices mainly in the Auckland and Northland regions,[19] which  
6  
7 serve around 1.7 million people, representing around 37 % of the New Zealand population[20]. Any patient with their CVD risk assessed by a  
8  
9 general practitioner (GP) or practice nurse into online PREDICT-CVD forms are included in the PREDICT cohort.  
10  
11

12  
13 New Zealand CVD risk management guidelines recommend that all men over 45 years and all women over 55 years have a regular CVD risk  
14  
15 assessment[21]. Specified high-CVD risk groups, including those of South Asian ethnicity, are recommended to undergo a risk assessment ten  
16  
17 years earlier than the general population.  
18  
19

20  
21 We used PREDICT data from August 2002 until September 2012. Members of the cohort were enrolled and examined continuously throughout  
22  
23 this period via their contact with the primary health care. We included individuals aged 30 to 74 years since the dataset was comprised of  
24  
25 people undergoing a risk assessment based on a Framingham risk score intended for people in this age group[22]. Using information from the  
26  
27 GP, hospital discharges and medication dispensing, we excluded persons with a history of CVD (CHD (including angina), stroke, TIA, peripheral  
28  
29 vascular disease (PVD), percutaneous coronary intervention (PCI) or coronary artery bypass grafting (CABG)), or atrial fibrillation at baseline  
30  
31 (n=24 537), and people with overt renal disease, those who had eGFR  $\leq$  29 and those with prior hospitalisations for congestive heart failure or  
32  
33 who were on loop diuretics at baseline (n=1582). Only subjects with European or Indian background were included. The risk factor  
34  
35 measurements in the PREDICT cohort were extracted from a standardised electronic template that primary care practitioners completed. The  
36  
37 SBP was based on the mean of the last two recordings done by the GP or practice nurse, in most cases with a manual mercury  
38  
39  
40  
41  
42  
43  
44  
45  
46  
47  
48  
49



1  
2  
3  
4  
5 sphygmomanometer. Blood lipid and glucose or HbA1c measurements were carried out in the community laboratories routinely used by  
6  
7  
8 general practitioners and smoking status and other risk factor data was measured using a standard questionnaire completed by a primary care  
9  
10 practitioner.

### 11 12 13 **Cohort of Norway**

14  
15 We included participants from three surveys conducted during 2000-2002 in Oslo, Norway; The Oslo Health Study (HUBRO), The Oslo  
16  
17 Immigrant Health Study (I-HUBRO) and The Romsås in Motion study (MoRo II) (n=26 709), which are part of the Cohort of Norway  
18  
19 (CONOR)[23]; a collection of health data and blood samples from several Norwegian health surveys. Participation rates for the three studies  
20  
21 were 40-46%[23].  
22  
23

24  
25 All CONOR surveys followed the same standard procedure for collection of data from self-administered questionnaires, physical measurements  
26  
27 and blood samples. The CONOR questionnaire provided information on self-reported diabetes, smoking, use of blood pressure and/or lipid  
28  
29 lowering medication and family history of CVD. All participants attended a clinical examination and non-fasting venous blood samples were  
30  
31 drawn. SBP was measured by an automatic device (DINAMAP, Criticon, Tampa, FL,USA) after 2 minutes of seated resting. Three recordings  
32  
33 were made at 1-min intervals. For the analyses we used the average of the second and third SBP measurements. The blood samples were  
34  
35 subsequently measured for total cholesterol (TC) and HDL cholesterol[23].  
36  
37  
38  
39  
40  
41  
42  
43  
44  
45

1  
2  
3  
4  
5 Using an 11-digit personal identifier, CONOR data were linked to hospitalizations and deaths in the Cardiovascular Disease in Norway (CVDNOR)  
6  
7 project, 1994-2009[24,25]. This enabled us to follow CONOR participants for CVD outcomes (hospitalizations or deaths) occurring after CONOR  
8  
9 examination through December 31<sup>st</sup> 2009.  
10

11  
12 We included participants aged 30-74 years old at baseline (n=3 871 excluded) to ensure comparable samples between the Norwegian and New  
13  
14 Zealand data. We excluded participants not born in Norway or South Asia (n=5 651 excluded), pregnant women (n=197), and participants with  
15  
16 prior CVD ((coronary heart disease (CHD), cerebrovascular disease, atherosclerotic disease, transient ischemic attack (TIA) and heart failure  
17  
18 (HF)) (n=353) or atrial fibrillation (n=31) registered in the hospital data before screening.  
19  
20  
21

## 22 23 **Outcomes**

24  
25 In both cohorts, we identified the first CVD event (non-fatal and fatal) using main or secondary diagnoses from hospital discharge data or the  
26  
27 underlying cause of death from national mortality statistics. The International Classification of Diseases (ICD) codes (versions 9 and/or 10) were  
28  
29 used to define outcome variables. New Zealand hospitals used an Australian modification of the ICD-10 classification called ICD10-AM[26].  
30  
31

32  
33 CVD in the Norwegian cohort included the codes: ICD9: 410-414, 428, 430-438, 440, 441 except 441.7, 442, 443.9, 444; ICD10:I20-I25, I50, I60-  
34  
35 I69, I70-I79, G45. The CVD variable in the New Zealand PREDICT cohort also included some additional ICD10-codes (I469, J81, G460-G468, Z951,  
36  
37 Z955, Z958, Z959) plus a list of procedure codes (too many to be listed here). The PREDICT CVD outcome has been described elsewhere[19].  
38  
39  
40  
41  
42

## Ethnicity

Ethnicity in the New Zealand PREDICT data was based on two sources: 1) the PREDICT template filled in by the GP and 2) the National Health Index dataset, both according to pre-defined categories. A prioritising algorithm was used to agree on one ethnicity in case of multiple ethnicities recorded. The system for coding ethnicity in New Zealand enables identification of Indian people, who account for approximately 90% of South Asian people living in New Zealand. The remaining South Asian ethnic groups are classified as part of the “Other Asian” ethnic group in national health data and so could not be included here. Indian people can include both immigrants and individuals who have been born in New Zealand with parents (or older generations) who have immigrated. The majority of this group are immigrants since 76.5% of the people who identified themselves with the Indian ethnic group in New Zealand in 2013 were born overseas[27].

For the Norwegian cohort, we used country of birth merged into larger world regions to define ethnicity[28]. We defined South Asians as individuals who migrated to Norway from Bangladesh, Myanmar, Sri Lanka, Pakistan, India or Nepal[28]. The largest share of South Asians in this dataset (95%) came from the HUBRO or the I-HUBRO study. HUBRO and I-HUBRO combined included 1145 Sri Lankans and 780 Pakistanis,[29] indicating that about 50% of the South Asian group (n=2206) in the present study are Sri Lankans and 35% are Pakistanis.

1  
2  
3  
4  
5 In general, we refer to the ethnic groups as South Asians (South Asians in Norway and/or Indians in New Zealand) and Europeans (ethnic  
6  
7  
8 Norwegians and/or New-Zealanders with ethnic European origin). Most European New Zealanders are of British and Irish ancestry, of whom  
9  
10 about three quarters were born in New Zealand.

### 11 12 13 **Statistical analysis**

14  
15 Baseline characteristics are reported as mean values with standard deviations for continuous variables and fractions for categorical variables.  
16  
17 We tested the differences between the ethnic groups adjusted for age by analysis of covariance. We used Cox regression models to examine  
18  
19 the prospective relationship between baseline risk factors (blood pressure, lipids, diabetes and smoking) and time until subsequent first CVD  
20  
21 event. People were censored if they died from other causes. Cox regression was also used to calculate hazard ratios (HRs) for CVD in South  
22  
23 Asians versus Europeans using ethnicity as the exposure variable and adjusting for risk factors. Proportional hazards assumptions were tested  
24  
25 using scaled Schoenfeld residuals[30]. All analyses were stratified by sex and ethnicity. Only complete cases were included in the analyses.  
26  
27  
28  
29 Stata 14 was used for analyses in the Norwegian data and Stata 11 for analysis in the New Zealand data.

30  
31  
32 To check whether the use of BP medication at baseline would impact the analyses where SBP were included, we repeated the Cox regression  
33  
34 analyses excluding people using antihypertensive medication at baseline. Correspondingly, we also repeated the Cox-regression analyses for  
35  
36  
37 TC/HDL ratio without people using lipid lowering medication at baseline.  
38  
39  
40  
41  
42  
43  
44  
45

## Ethics

The current project was approved by the Regional Committee for Medical Research Ethics, Health Region West. Each individual CONOR study was approved by the Norwegian Data Inspectorate and evaluated by the Regional Committee for Medical Research ethics[31]. The PREDICT study was approved by the Northern Region Ethics Committee Y in 2003 (AKY/03/12/134), and later annually approved by the National Multi Region Ethics Committee since 2007 (MEC07/19/EXP)[19]. Both datasets contained anonymized data.

## RESULTS

### Baseline characteristics

The final study sample from the New Zealand cohort consisted of 129 449 individuals (43% women) of European (87%) or Indian ethnicity (13%) with no history of CVD, atrial fibrillation or renal disease. Correspondingly for the Norwegian cohort, the final study sample consisted of 16 606 individuals (54% women) born in either Norway (87%) or South Asia (13%) with no history of CVD or atrial fibrillation.

At baseline, the Norwegian cohort was younger than the New Zealand cohort, and New Zealand women were older than New Zealand men (Table 1). In both cohorts, South Asians were younger than Europeans.

Table 1. Baseline characteristics (unadjusted) of the Norwegian and New Zealand participants. Participants free of prior CVD.

|                                                 | <i>Norwegian cohort</i> |                    | <i>Women</i>     |                    |
|-------------------------------------------------|-------------------------|--------------------|------------------|--------------------|
|                                                 | <i>Norwegian</i>        | <i>South Asian</i> | <i>Norwegian</i> | <i>South Asian</i> |
| <i>N</i>                                        | 6 385                   | 1 239              | 8 015            | 967                |
| <i>Age (years)</i>                              | 43.7 (11.2)             | 41.4 (7.8)         | 43.9 (10.9)      | 40.3 (7.9)         |
| <i>Age range</i>                                | 30.0 – 70.1             | 30.0 - 67.8        | 30.0 – 74.9      | 30.0 - 65.5        |
| <i>TC (mmol/L)</i>                              | 5.60 (1.1)              | 5.48 (1.0)         | 5.41 (1.0)       | 4.98 (0.9)         |
| <i>HDL cholesterol (mmol/L)</i>                 | 1.31 (0.3)              | 1.07 (0.2)         | 1.62 (0.4)       | 1.24 (0.3)         |
| <i>TC/HDL ratio</i>                             | 4.55 (1.4)              | 5.33 (1.4)         | 3.52 (1.1)       | 4.22 (1.2)         |
| <i>SBP (mmHg)</i>                               | 132.6 (14.4)            | 126.6 (13.2)       | 124.0 (15.7)     | 119.1 (15.6)       |
| <i>Diastolic blood pressure (mmHg)</i>          | 77.6 (10.8)             | 76.9 (9.8)         | 71.5 (10.3)      | 70.0 (10.1)        |
| <i>Hypertension<sup>†</sup> (%)</i>             | 30                      | 22                 | 19               | 16                 |
| <i>Diabetes (%)</i>                             | 1.6                     | 8.7                | 1.4              | 10.9               |
| <i>Former smokers (%)</i>                       | 28                      | 16                 | 26               | 2                  |
| <i>Current smokers (%)</i>                      | 26                      | 25                 | 31               | 1                  |
| <i>Family history of heart disease* (%)</i>     | 33                      | 24                 | 37               | 27                 |
| <i>Family history of stroke<sup>#</sup> (%)</i> | 11                      | 3                  | 13               | 4                  |
| <i>Antihypertensive treatment (%)</i>           | 6                       | 8                  | 6                | 9                  |
| <i>Lipid lowering treatment (%)</i>             | 4                       | 6                  | 3                | 6                  |
| <i>Follow-up time (years)</i>                   | 8.44 (1.4)              | 7.65 (1.4)         | 8.54 (1.2)       | 7.88 (1.1)         |
|                                                 |                         | <i>Men</i>         |                  | <i>Women</i>       |
|                                                 |                         | <i>European</i>    |                  | <i>Indian</i>      |
| <i>N</i>                                        | 63 319                  | 9 997              | 49 094           | 7 039              |
| <i>Age (years)</i>                              | 55.0 (9.3)              | 47.4 (9.7)         | 58.7 (8.7)       | 52.9 (8.5)         |
| <i>Age range</i>                                | 30.0 - 74.0             | 30.0 - 74.0        | 30.0 - 74.0      | 30.0 - 74.0        |
| <i>TC (mmol/L)</i>                              | 5.36 (1.1)              | 5.09 (1.1)         | 5.68 (1.1)       | 5.04 (1.0)         |
| <i>HDL cholesterol (mmol/L)</i>                 | 1.29 (0.4)              | 1.14 (0.3)         | 1.59 (0.5)       | 1.30 (0.3)         |
| <i>LDL cholesterol (mmol/L)</i>                 | 3.3 (1.0)               | 2.9 (1.0)          | 3.4 (1.1)        | 2.8 (0.9)          |
| <i>TC/HDL ratio</i>                             | 4.35 (1.3)              | 4.60 (1.3)         | 3.68 (1.1)       | 3.93 (1.1)         |
| <i>SBP (mmHg)</i>                               | 131.5 (16.3)            | 125.3 (16.1)       | 131.6 (17.4)     | 126.1 (17.4)       |

|                                        |             |             |            |            |
|----------------------------------------|-------------|-------------|------------|------------|
| Diastolic blood pressure (mmHg)        | 80.5 (10.0) | 79.1 (10.4) | 78.8 (9.7) | 77.4 (9.8) |
| Hypertension <sup>†</sup> (%)          | 40          | 34          | 44         | 39         |
| Type 2 diabetes <sup>§</sup> (%)       | 9           | 24          | 9          | 29         |
| Former smokers (%)                     | 19          | 6           | 16         | 1          |
| Current smokers (%)                    | 12          | 9           | 10         | 1          |
| Family history of CVD <sup>§</sup> (%) | 12          | 8           | 15         | 10         |
| Antihypertensive treatment (%)         | 24          | 26          | 30         | 32         |
| Lipid lowering treatment (%)           | 18          | 27          | 18         | 27         |
| Follow-up time (years)                 | 2.94 (2.3)  | 2.93 (2.0)  | 2.92 (2.3) | 2.83 (1.9) |

Data are mean values (SD) for continuous variables and prevalence (%) for categorical variables. <sup>†</sup>Hypertension is defined as having systolic blood pressure  $\geq 140$  mmHg or diastolic blood pressure  $\geq 90$  mmHg or using blood pressure medication.

HDL, high density lipoprotein; LDL, low density lipoprotein; SBP, systolic blood pressure, TC, total cholesterol. \*Parents or siblings have had heart attack or angina pectoris (self-report).

<sup>#</sup>Parents or siblings have had stroke (self-report). <sup>§</sup>The diabetes variable in the New Zealand data includes people with diabetes of unknown type (5%) and type 2 diabetes (95%), while in the Norwegian data we could not differentiate between different types of diabetes. <sup>§</sup>Family history of CVD in the New Zealand data: self-reported familial history of ischemic heart disease or ischemic stroke occurring in a father or brother <55 years of age, or a mother or sister <65 years of age

South Asians had lower levels of TC and HDL and higher mean levels of TC/HDL ratios than Europeans in both Norway and New Zealand. South Asians also had the lowest SBP levels (Table 1). These differences persisted after adjustment for age ( $p < 0.05$  for differences between ethnic groups – results not shown).

The diabetes baseline prevalence was higher among South Asians compared to Europeans in both cohorts (Table 1). The difference in diabetes were the same after adjustment for age ( $p < 0.001$ ). Antihypertensive and lipid lowering treatments were generally more prevalent among South Asians than Europeans, and more prevalent in the New Zealand cohort compared to the Norwegian cohort. Cigarette smoking was more

1  
2  
3  
4  
5 common among Europeans than South Asians, and practically none of the South Asian women smoked. Mean follow up time was significantly  
6  
7 longer in the Norwegian cohort than in the New Zealand cohort (Table 1).  
8

### 9 10 **CVD events**

11  
12 During follow-up, we observed 743 new CVD events among the 16 606 individuals in the Norwegian cohort (139 470 person-years) and 2 654  
13  
14 CVD events among 129 446 individuals in the New Zealand cohort (378 874 person-years). The overall crude rates were 533 per 100 000  
15  
16 person-years in the Norwegian cohort and 700 per 100 000 person-years in the New Zealand cohort. Ethnic specific rates and age-adjusted  
17  
18 HRs, for men and women in the two cohorts are shown in the Appendices (tables A1-A4).  
19  
20  
21  
22

### 23 **Prospective associations between risk factors and CVD**

24  
25 Increasing age was significantly associated with risk of CVD in both ethnic groups in both cohorts (Table 2). The age effect was very similar  
26  
27 within the countries for both ethnic groups and gender, but was stronger in the Norwegian cohort compared to the New Zealand cohort. After  
28  
29 adjustment for age, the traditional CVD risk factors were positively associated with CVD in both ethnic groups, across gender and country.  
30  
31 Whereas all the risk factor-CVD event associations were statistically significant in Europeans, the 95% CIs were wider and the results not always  
32  
33 statistically significant among South Asians. The relationship between SBP, TC/HDL ratio, smoking and subsequent CVD appeared to be weaker  
34  
35 in Indian men compared to European men in the New Zealand cohort. The prospective association between the risk factors and CVD changed  
36  
37 little after adjusting for the other risk factors in addition to age (results not shown). In the sensitivity analyses where we excluded people using  
38  
39  
40  
41  
42  
43  
44  
45  
46  
47  
48  
49



BP- and lipid lowering medication at baseline, the estimates for the prospective associations between risk factors and CVD were similar as in the main analyses. However, for women in the New Zealand cohort, after excluding people on lipid-lowering medication, the HR for TC/HDL ratio changed to 1.12; 95% CI 0.91-1.39 for Indian women and to 1.20; 95% CI 1.12-1.27 for European women.

Table 2. Age-adjusted hazard ratios for first CVD event after baseline for selected risk factors in men and women aged 30-74 years with no history of CVD, stratified by cohort, ethnicity and gender.

| <b>MEN</b>                |                               |                       |                       |                       |                                |                          |                                 |
|---------------------------|-------------------------------|-----------------------|-----------------------|-----------------------|--------------------------------|--------------------------|---------------------------------|
|                           | <b>N events/N<sup>‡</sup></b> | <b>Age (one year)</b> | <b>SBP (10 mm/Hg)</b> | <b>DBP (10 mm/Hg)</b> | <b>TC/HDL ratio (one unit)</b> | <b>Diabetes (yes/no)</b> | <b>Current smoking (yes/no)</b> |
| <i>New Zealand cohort</i> |                               | HR (95%CI)            | HR (95%CI)            | HR (95%CI)            | HR (95%CI)                     | HR (95%CI)               | HR (95%CI)                      |
| <b>European men</b>       | 1518/63316                    | 1.07 (1.06-1.07)      | 1.15 (1.12-1.18)      | 1.16 (1.10-1.22)      | 1.20 (1.16-1.23)               | 1.92 (1.68-2.19)         | 2.29 (2.02-2.59)                |
| <b>Indian men</b>         | 273/9997                      | 1.06 (1.05-1.07)      | 1.05 (0.98-1.13)      | 1.02 (0.91-1.14)      | 1.08 (0.98-1.19)               | 1.72 (1.34-2.20)         | 1.45 (0.99-2.11)                |
| <i>Norwegian cohort</i>   |                               |                       |                       |                       |                                |                          |                                 |
| <b>Norwegian men</b>      | 379/6385                      | 1.10 (1.09-1.11)      | 1.15 (1.08-1.22)      | 1.19 (1.08-1.30)      | 1.22 (1.15-1.30)               | 3.15 (2.14-4.65)         | 1.86 (1.51-2.29)                |
| <b>South Asian men</b>    | 79/1239                       | 1.11 (1.08-1.14)      | 1.17 (1.01-1.35)      | 1.21 (0.97-1.51)      | 1.23 (1.05-1.42)               | 1.61 (0.90-2.86)         | 1.43 (0.88-2.30)                |
| <b>WOMEN</b>              |                               |                       |                       |                       |                                |                          |                                 |
|                           | <b>N events/N<sup>‡</sup></b> | <b>Age (one year)</b> | <b>SBP(10 mm/Hg)</b>  | <b>DBP (10 mm/Hg)</b> | <b>TC/HDL ratio (one unit)</b> | <b>Diabetes (yes/no)</b> | <b>Current smoking (yes/no)</b> |
| <i>New Zealand cohort</i> |                               | HR (95%CI)            | HR (95%CI)            | HR (95%CI)            | HR (95%CI)                     | HR (95%CI)               | HR (95%CI)                      |
| <b>European women</b>     | 757/49094                     | 1.06 (1.05-1.07)      | 1.09 (1.05-1.13)      | 1.13 (1.05-1.22)      | 1.14 (1.09-1.21)               | 1.93 (1.59-2.35)         | 2.74 (2.30-3.27)                |
| <b>Indian women</b>       | 106/7039                      | 1.06 (1.03-1.08)      | 1.27 (1.16-1.39)      | 1.25 (1.03-1.50)      | 1.21 (1.03-1.41)               | 2.29 (1.55-3.37)         | 2.60 (0.64-10.59)               |
| <i>Norwegian cohort</i>   |                               |                       |                       |                       |                                |                          |                                 |
| <b>Norwegian women</b>    | 259/8015                      | 1.10 (1.09-1.12)      | 1.20 (1.12-1.28)      | 1.32 (1.18-1.47)      | 1.30 (1.19-1.43)               | 2.79 (1.52-5.11)         | 2.22 (1.73-2.84)                |
| <b>South Asian women</b>  | 26/967                        | 1.14 (1.09-1.19)      | 1.06 (0.86-1.30)      | 1.07 (0.74-1.55)      | 1.04 (0.77-1.39)               | 2.74 (1.21-6.22)         | †                               |

<sup>‡</sup>The numbers of events and people included in the analyses may differ due to missing risk factor data. Few were missing in the NZ cohort. <sup>†</sup> Not calculated due to no exposed cases.

DBP, diastolic blood pressure; HDL, high density lipoprotein; SBP, systolic blood pressure; TC, total cholesterol.

### Ethnic difference in CVD

South Asians of both genders in Norway and New Zealand had increased risk of CVD compared to the European majority populations (Table 3), being respectively 92% and 87% higher in South Asian men and women in Norway, and 75% and 42% higher in South Asian men and women in New Zealand. After adjustment for TC/HDL ratio and diabetes, the HRs for South Asians versus Europeans were reduced and no longer significant in women. Additional adjustments for SBP and smoking increased the hazard ratios again so that South Asians in both countries had significantly increased risk of CVD compared to Europeans. In the Norwegian cohort, South Asians had 57% and 76% higher risk than Europeans in men and women respectively after adjustment for age, TC/HDL ratio, diabetes, SBP and smoking. The corresponding excess risk after full adjustment was 64% for men and 39% for women in South Asians vs Europeans in the New Zealand cohort.

Table 3. Hazard ratios (95% CI) for first CVD event in South Asian groups compared to ethnic European groups in Norway and New Zealand.

|                                                  | Men                          |                         | Women                        |                            |
|--------------------------------------------------|------------------------------|-------------------------|------------------------------|----------------------------|
|                                                  | South Asians vs. Norwegians* | Indian vs. European NZ* | South Asians vs. Norwegians* | Indian NZ vs. European NZ* |
| <b><i>N events/N Adjusted for</i></b>            | 436/7387                     | 1791/73308              | 264/8558                     | 8631/56126                 |
| <b>Age</b>                                       | 1.92 (1.48-2.49)             | 1.75 (1.53-2.00)        | 1.87 (1.21-2.87)             | 1.42 (1.16-1.75)           |
| <b>Age, TC/HDL ratio</b>                         | 1.66 (1.27-2.16)             | 1.77 (1.55-2.02)        | 1.52 (0.98-2.36)             | 1.41 (1.14-1.73)           |
| <b>Age, TC/HDL ratio, diabetes</b>               | 1.42 (1.08-1.87)             | 1.49 (1.30-1.71)        | 1.30 (0.82-2.04)             | 1.15 (0.92-1.42)           |
| <b>Age, TC/HDL ratio, diabetes, SBP</b>          | 1.53 (1.16-2.01)             | 1.57 (1.37-1.80)        | 1.31 (0.83-2.07)             | 1.19 (0.96-1.47)           |
| <b>Age, TC/HDL ratio, diabetes, SBP, smoking</b> | 1.57 (1.19-2.07)             | 1.64 (1.43-1.88)        | 1.76 (1.09-2.82)             | 1.39 (1.11-1.73)           |

HDL, high density lipoprotein; NZ, New Zealand; SBP, systolic blood pressure; TC, Total cholesterol.

All had complete information on the risk factors

1  
2  
3  
4  
5 After excluding people using lipid lowering medication in the sensitivity analyses for table 3, the HRs were more attenuated when adding  
6  
7 TC/HDL ratio to the age-adjusted model than before the exclusion, especially for men in the New Zealand cohort (HRs: 1.61; 95%CI 1.36-1.91 in  
8  
9 men and 1.38; 95% CI 1.06-1.79 in women).

## 12 13 **DISCUSSION**

14  
15 This study confirmed that the traditional risk factors SBP, TC/HDL ratio, diabetes and smoking are all positively associated with risk of CVD in  
16  
17 South Asians as well as in Europeans. The present study also confirmed that South Asians had an increased risk of CVD compared to Europeans  
18  
19 and that ethnic differences in the distribution of TC/HDL ratio and type 2 diabetes appear to explain some of this excess risk.

20  
21 The main strengths of this study are the prospective study design, and inclusion of data from two countries. Unfortunately, we lacked  
22  
23 information about duration of stay for the immigrants and the ethnic groups that we studied are heterogeneous.

24  
25  
26  
27  
28 Strengths of CONOR data are the standardized measurements of risk factors, the linkage with disease outcomes from comprehensive national  
29  
30 health registers and the standardized way of defining ethnicity using country of birth. A validation study examining the Oslo Health study,  
31  
32 showed that participants with a non-western background had a lower participation rate than others[32]. This may reflect self-selection which  
33  
34 can work both ways; healthy and resourceful people have the energy and motivation to participate or less healthy people who think their  
35  
36 health could benefit from participating do so. Self-selection is unlikely to influence associations between risk factors and subsequent disease,  
37  
38 but could influence the ethnic comparisons if the mechanisms were systematically different for the ethnic groups. The South Asian group in the  
39  
40  
41  
42

1  
2  
3  
4  
5 Norwegian cohort was relatively small, which reduced the precision of the estimates and limited the statistical power. Another limitation in the  
6  
7 CONOR data is missing information on some of the risk factors (see tables A1-A2 in the appendices for numbers of missing).  
8  
9

10 Strengths of the PREDICT cohort are the large sample size and the completeness of risk factors included in the risk-assessment. Furthermore,  
11  
12 comprehensive national health registers were used to identify and exclude people with prior CVD and to determine cardiovascular outcomes.  
13  
14 In the New Zealand cohort, some recruitment bias is likely since risk assessment was initially prioritized for high-risk patients. The  
15  
16 representativeness of the source population is, however, improving as PREDICTs coverage increases. In this study, follow-up extended to 2012  
17  
18 when PREDICT included 50% of guideline-eligible patients in the practices where the PREDICT software is used[33]. We did not assume that the  
19  
20 cohorts were representative of the general populations in the two countries, but that the ethnic groups within the two cohorts should be  
21  
22 comparable. Results from the two cohorts showed approximately the same regarding ethnic differences, which is a strength concerning the  
23  
24 external validity of these results. A limitation in the New Zealand data is short follow-up time restricting the statistical power. Another  
25  
26 limitation is the lack of standardized BP measurements since recorded BP can easily be affected by a range of factors including the type of  
27  
28 device used[34].  
29  
30  
31  
32  
33  
34

35 In both cohorts, the endpoints are based on register data, including both hospital and mortality data, which enables almost complete  
36  
37 ascertainment of CVD events. In New Zealand, more than 95% of patients with an acute CVD event are managed by government-funded health  
38  
39 services[19]. However, CVD events occurring among participants who travelled outside of New Zealand, those who emigrated after the index  
40  
41  
42  
43  
44  
45

1  
2  
3  
4  
5 CVD risk assessment or among participants treated in private hospitals would not be captured in the national hospital and mortality  
6 registers[19]. We have no information about possible emigration for the New Zealand cohort, but for the Norwegian cohort we know that few  
7  
8 people have emigrated (about 1% of the ethnic Norwegians and <3% of the South Asians who participated in the Oslo health studies had  
9  
10 emigrated by the end of follow-up).  
11  
12  
13

14  
15 Our finding that the traditional major CVD risk factors contribute to the development of CVD in South Asians as in Europeans was an expected,  
16  
17 yet important, finding since most knowledge about CVD prevention is based on studies in populations of European descent, and some have  
18  
19 questioned whether these risk factors apply worldwide[11, 35]. This finding is in line with the large INTERHEART and INTERSTROKE case-control  
20  
21 studies[11, 12], which reported that 90% of the population attributable risk for AMI and stroke worldwide was accounted for by respectively  
22  
23 nine and ten (similar) risk factors, including those included in the present study. We are only aware of two other prospective studies reporting  
24  
25 HRs for the prospective relationship between major CVD risk factors and subsequent CVD in South Asians[7, 36]. One of these studies included  
26  
27 only men,[7] and the other showed estimates for men and women combined and did not include blood lipids[36]. These studies generally agree  
28  
29 with our findings that traditional risk factors contribute to the development of CVD in South Asians as in Europeans[7, 36]. Also, consistent with  
30  
31 previous reports[5, 6], we found that South Asians in both Norway and New Zealand have a higher risk of CVD compared to the European  
32  
33 majority populations. By including all the measured risk factors (BP, TC/HDL ratio, diabetes and smoking) as adjustment variables in one  
34  
35  
36  
37  
38  
39  
40  
41  
42  
43  
44  
45

1  
2  
3  
4  
5 statistical model, we could not explain the higher risk of CVD in South Asians. However, the increased risk was attenuated when we only  
6  
7 included the risk factors more prevalent in South Asians than in Europeans (TC/HDL ratio and diabetes).  
8  
9

10 The excess risk of CVD among South Asians compared to Europeans in the Norwegian cohort was almost two-fold. This is comparable to what  
11 we reported previously when studying the total Norwegian population[5]. The South Asians in the New Zealand cohort had 42-75% higher risk  
12 of CVD compared to European New Zealanders which also agrees with previous New Zealand studies [6]. In both the Norwegian and New  
13 Zealand data, South Asians had higher baseline levels of dyslipidemia indicated by the TC/HDL ratio and higher diabetes prevalence compared  
14 to the European majority populations, which is in general agreement with previous knowledge from these countries[14-16]. Attenuation of the  
15 excess risk in South Asians versus Europeans was best achieved in the Cox model only including diabetes and TC/HDL ratio as covariates in  
16 addition to age. The same was found in both cohorts, clearly indicating that the unfavorable distribution of blood lipids and type 2 diabetes  
17 explains some of the higher risk of CVD in South Asians. South Asians generally have a high prevalence of metabolic risk factors related to  
18 insulin resistance, often clustered so that they match the concept of the metabolic syndrome[37-40]. A British cohort study that tested  
19 whether traditional risk factors could account for the high mortality of CHD among South Asian men compared to European men, reported that  
20 adjusting for insulin resistance, dyslipidemia and hyperglycemia in South Asians did not explain their higher risk[7]. However, they also adjusted  
21 for smoking and total cholesterol, which were both less prevalent/lower among South Asian men compared to European men.  
22  
23  
24  
25  
26  
27  
28  
29  
30  
31  
32  
33  
34  
35  
36  
37  
38  
39  
40  
41  
42  
43  
44  
45  
46  
47  
48  
49

1  
2  
3  
4  
5 It is unclear why the traditional risk factors do not completely explain the excess risk of CVD in South Asians. This could be related to  
6  
7 incomplete adjustments; due to either imprecise measurement of risk factors or that other important risk factors were not included (e.g. waist  
8  
9 measurement, length of time since diabetes diagnosis). A number of non-conventional risk factors are also thought to partially account for the  
10  
11 high risk of CVD in South Asians, including dysfunctional HDL, C-Reactive Protein, thrombogenic risk factors, telomere length, high  
12  
13 homocysteine levels and low birth weight[41, 42]. Socioeconomic factors could probably also explain some of the differences in risk between  
14  
15 the ethnic groups, but we did not have such variables. Another possibility is that risk factors work cumulatively over time in the development of  
16  
17 atherosclerosis, and some risk factors may also work at specific and crucial time points during the life course. Measurements taken on single  
18  
19 occasions may also lead to an underestimation of the strength between the *usual* levels of the risk factors and later disease, known as the  
20  
21 regression dilution bias[43]. Consequently, it is unlikely that the ethnic differences would disappear completely by adjusting for selected risk  
22  
23 factors measured once in midlife.  
24  
25  
26  
27  
28

29 Although South Asians seem to have an underlying susceptibility for metabolic diseases, traditional and modifiable risk factors are important  
30  
31 for preventing disease. Our analyses indicate that it is important to focus on the prevention of type 2 diabetes and dyslipidaemia when aiming  
32  
33 to reduce the burden of CVD among South Asians. The additional effect of abdominal obesity for the risk of CVD among South Asians in Norway  
34  
35 and New Zealand has, however, not yet been studied although we know that the prevalence is high in this ethnic group[38, 44]. In both  
36  
37 Norway[45, 46] and New Zealand,[47] intervention studies targeting immigrants from South Asia have been carried out with some promising  
38  
39  
40  
41  
42  
43  
44  
45

1  
2  
3  
4  
5 results. A UK-study that prospectively examined the influence from four health behaviors on the risk of CVD in South Asian immigrants and UK  
6  
7 Europeans found an important potential for disease prevention among South Asians if they adhered to healthy behaviors[8].  
8  
9

## 10 11 12 **CONCLUSION**

13  
14 Ethnic differences in distribution of TC/HDL ratio and type 2 diabetes explained some, but not all, the excess risk of CVD in South Asians  
15  
16 compared to Europeans in Norway and New Zealand. Smoking and elevated BP were less prevalent among South Asians and thus could not  
17  
18 explain any of the observed differences in risk of CVD. Targeted diabetes and dyslipidaemia management among South Asians, including  
19  
20 support for healthy lifestyle choices, should be a priority if the high burden of CVD in these ethnic populations is to be reduced.  
21  
22  
23  
24  
25  
26  
27

## 28 **Acknowledgements**

29  
30 The authors thank Tomislav Dimoski at the Norwegian Knowledge Centre for Health Services, Oslo, Norway for his contribution by developing  
31  
32 software necessary for obtaining data from Norwegian hospitals, conducting the data collection and quality assurance of data in this project.  
33  
34 We also wish to thank Dr. Geeta Gala and Dr Roshini Peiris-John, members of the South Asian governance group for the University of Auckland  
35  
36 VIEW research team, for reviewing the paper and giving us their feedback.  
37  
38  
39  
40  
41  
42  
43  
44  
45  
46  
47  
48  
49



1  
2  
3  
4  
5 **Competing interests:** All authors have completed the ICMJE uniform disclosure form at [www.icmje.org/coi\\_disclosure.pdf](http://www.icmje.org/coi_disclosure.pdf). Dr. Jackson and Dr.  
6  
7 Mehta both report grants from Health Research Council of New Zealand. All other co-authors declare to have no competing interests.  
8

9  
10 **Funding:** This work was supported by the Norwegian Extra-Foundation for Health and Rehabilitation (grant number 2012-2-0129).  
11

12  
13 **Contributors:** HEM, RJ and GST contributed to the conception and design of the work. RJ, BK, AKJ and GST contributed to the collection of data.  
14  
15  
16 JI, RP and SM contributed to data preparations and definition of endpoints. KRS drafted the paper and carried out the data analyses. All authors  
17  
18 contributed to the interpretation of data as well as critical reading and revision of the draft.  
19

20  
21 **Data sharing statement:** No additional data are available.  
22  
23  
24  
25  
26  
27  
28  
29  
30  
31  
32  
33  
34  
35  
36  
37  
38  
39  
40  
41  
42  
43  
44  
45  
46  
47  
48  
49

## REFERENCES

1. Zaman MJ, Bhopal RS. New answers to three questions on the epidemic of coronary mortality in south Asians: incidence or case fatality? Biology or environment? Will the next generation be affected? *Heart* 2013;99(3):154-8.
2. Bo A, Zinckernagel L, Krasnik A et al. Coronary heart disease incidence among non-Western immigrants compared to Danish-born people: effect of country of birth, migrant status, and income. *Eur J Prev Cardiol* 2015;22(10):1281-9
3. Hedlund E, Lange A, Hammar N. Acute myocardial infarction incidence in immigrants to Sweden. Country of birth, time since immigration, and time trends over 20 years. *Eur J Epidemiol* 2007;22(8):493-503.
4. Tillin T, Hughes AD, Mayet J, et al. The Relationship Between Metabolic Risk Factors and Incident Cardiovascular Disease in Europeans, South Asians, and African Caribbeans: SABRE (Southall and Brent Revisited)—A Prospective Population-Based Study. *J Am Coll Cardiol*. 2013;61(17):1777-1786.
5. Rabanal KS, Selmer RM, Iglund J et al. Ethnic inequalities in acute myocardial infarction and stroke rates in Norway 1994-2009: a nationwide cohort study (CVDNOR). *BMC Public Health* 2015;15:1073.
6. Ministry of Health, *Asian Health Chart Book 2006*. 2006: Wellington: Ministry of Health
7. Forouhi N, Sattar N, Tillin T et al. Do known risk factors explain the higher coronary heart disease mortality in South Asian compared with European men? Prospective follow-up of the Southall and Brent studies, UK. *Diabetologia*, 2006;49(11):2580-2588.
8. Eriksen A, Tillin T, O'Connor L et al. The impact of health behaviours on incident cardiovascular disease in Europeans and South Asians—a prospective analysis in the UK SABRE study. *PLoS one*, 2015;1:15.
9. de Munter JS, Agyemang C, Stronks K et al, Association of physical activity, smoking, and alcohol intake with CVD-related hospital discharge in people of European, South Asian, or African descent. *Eur J Prev Cardiol* 2013;20(1):80-8.
10. Ranganathan M and Bhopal R. Exclusion and inclusion of nonwhite ethnic minority groups in 72 North American and European cardiovascular cohort studies. *PLoS medicine*, 2006;3(3):e44.
11. Yusuf S, Hawken S, Ounpuu S et al. Effect of potentially modifiable risk factors associated with myocardial infarction in 52 countries (the INTERHEART study): case-control study. *Lancet* 2004;364(9438):937-52.
12. O'Donnell MJ, Xavier D, Liu L et al. Risk factors for ischaemic and intracerebral haemorrhagic stroke in 22 countries (the INTERSTROKE study): a case-control study. *Lancet* 2010;376(9735):112-23.
13. Joshi P, Islam S, Pais P et al, Risk factors for early myocardial infarction in South Asians compared with individuals in other countries. *Jama* 2007;297(3):286-94
14. Perumal L, Wells S, Ameratunga S et al. Markedly different clustering of CVD risk factors in New Zealand Indian and European people but similar risk scores (PREDICT-14). *Aust N Z J Public Health* 2012;36(2):141-4.
15. Jenun A, Diep LM, Holmboe-Ottesen G et al. Diabetes susceptibility in ethnic minority groups from Turkey, Vietnam, Sri Lanka and Pakistan compared with Norwegians - the association with adiposity is strongest for ethnic minority women. *BMC Public Health* 2012;12(1):150.
16. Rabanal KS, Lindman AS, Selmer RM et al. Ethnic differences in risk factors and total risk of cardiovascular disease based on the Norwegian CONOR study. *Eur J Prev Cardiol* 2013;20(6):1013-1021.

- 1
- 2
- 3
- 4
- 5 17. Kumar B, Selmer R, Lindman AS et al. Ethnic differences in SCORE cardiovascular risk in Oslo, Norway. *Eur J Cardiovasc Prev Rehabil* 2009;16:229 -
- 6 234.
- 7 18. Bannink L, Wells S, Broad J et al. Web-based assessment of cardiovascular disease risk in routine primary care practice in New Zealand: the first
- 8 18,000 patients (PREDICT CVD-1). *N Z Med J* 2006; 119(1245):U2313.
- 9 19. Wells S, Riddell T, Kerr A et al. Cohort Profile: The PREDICT Cardiovascular Disease Cohort in New Zealand Primary Care (PREDICT-CVD 19). *Int J*
- 10 *Epidemiol* 2015:dyy312.
- 11 20. Statistics New Zealand. Subnational population estimates tables. Wellington: Statistics New Zealand. 2014.
- 12 21. New Zealand Guideline Group. The assessment and Management of Cardiovascular Risk. 2003: Wellington, New Zealand
- 13 22. Anderson KM, Odell PM, Wilson PW et al. Cardiovascular disease risk profiles. *Am Heart J* 1991;121(1):293-298.
- 14 23. Næss Ø, Sjøgaard AJ, Arnesen et al. Cohort Profile: Cohort of Norway (CONOR). *Int J Epidemiol* 2008; 37(3):481-485.
- 15 24. Sulo G, Iglund J, Vollset SE et al. Cardiovascular disease and diabetes mellitus in Norway during 1994-2009 CVDNOR - a nationwide research project.
- 16 *Norsk epidemiologi* 2013;23(1).
- 17 25. Sulo G, Iglund J, Nygård O et al. Favourable trends in incidence of AMI in Norway during 2001–2009 do not include younger adults: a CVDNOR
- 18 project. *Eur J Prev Cardiol* 2014;21.11:1358-64.
- 19 26. Ministry of Health. ICD-10-AM/ACHI/ACS. Wellington: Ministry of Health. September 25 2015]; Available from: [http://www.health.govt.nz/nz-](http://www.health.govt.nz/nz-health-statistics/classification-and-terminology/icd-10-am-achi-acs)
- 20 [health-statistics/classification-and-terminology/icd-10-am-achi-acs](http://www.health.govt.nz/nz-health-statistics/classification-and-terminology/icd-10-am-achi-acs).
- 21 27. Statistics New Zealand. Tauranga Aotearoa. 2013 Census. Ethnic group profile: Indian. Retrived 11.09.2015 from:
- 22 [http://www.stats.govt.nz/Census/2013-census/profile-and-summary-reports/ethnic-](http://www.stats.govt.nz/Census/2013-census/profile-and-summary-reports/ethnic-profiles.aspx?request_value=24743&parent_id=24726&tabname=#)
- 23 [profiles.aspx?request\\_value=24743&parent\\_id=24726&tabname=#](http://www.stats.govt.nz/Census/2013-census/profile-and-summary-reports/ethnic-profiles.aspx?request_value=24743&parent_id=24726&tabname=#) 2013.
- 24 28. Norwegian Institute of Public Health. Documentation of the CONOR file. Version 02.07.2012. 14.12.2016]; Available from:
- 25 <https://www.fhi.no/globalassets/migrering/dokumenter/pdf/documentation-of-the-conor-file.pdf>
- 26 29. Kumar B, Grøtvedt L, Meyer H et al. The Oslo immigrant health profile, in Rapport 2008:7. Oslo: Norwegian Institute of Public Health 2008.
- 27 30. Schoenfeld D. Partial residuals for the proportional hazards regression model. *Biometrika*. 1982;69(1)239-41.
- 28 31. Sogaard A. Cohort Norway (CONOR): Materials and methods: Norwegian Institute of Public Health; 2007. Available from:
- 29 <http://www.fhi.no/studier/cohort-of-norway>.
- 30 32. Sogaard A, Selmer R, Bjertness E et al. The Oslo Health Study: The impact of self-selection in a large population-based survey. *Int J Equity Health*.
- 31 2004;3(3):1-12.
- 32 33. Ministry of Health. How is my PHO performing? 2014/15 Quarter 3 (January to March) results. Wellington: Ministry of Health 2015 [February 5
- 33 2015]. Available from: <http://www.health.govt.nz/new-zealand-health-system/health-targets/how-my-pho-performing>.
- 34 34. Tolonen H, Koponen P, Naska A et al. Challenges in standardization of blood pressure measurement at the population level. *BMC Med Res Methodol*
- 35 2015;15:33.
- 36 35. Pais P, Pogue J, Gerstein H et al. Risk factors for acute myocardial infarction in Indians: a case-control study. *Lancet*. 1996;348(9024):358-63.
- 37
- 38
- 39
- 40
- 41
- 42
- 43
- 44
- 45
- 46
- 47
- 48
- 49

- 1  
2  
3  
4  
5 36. Williams ED, Stamatakis E, Chandola T et al. Physical activity behaviour and coronary heart disease mortality among South Asian people in the UK: an observational longitudinal study. *Heart*. 2011;97(8):655-9.
- 6  
7 37. Alberti KG, Eckel RH, Grundy SM, Zimmet PZ, Cleeman JI, Donato KA, et al. Harmonizing the metabolic syndrome: a joint interim statement of the International Diabetes Federation Task Force on Epidemiology and Prevention; National Heart, Lung, and Blood Institute; American Heart Association; World Heart Federation; International Atherosclerosis Society; and International Association for the Study of Obesity. *Circulation*. 2009;120(16):1640-5.
- 8  
9 38. Misra A and Khurana L. The metabolic syndrome in South Asians: epidemiology, determinants, and prevention. *Metab Syndr Relat Disord* 2009;7(6):497-514.
- 10  
11 39. McKeigue P, Shah B, Marmot M. Relation of central obesity and insulin resistance with high diabetes prevalence and cardiovascular risk in South Asians. *Lancet*. 1991;337(8738):382-6..
- 12  
13 40. Hjellset VT, Bjorge B, Eriksen HR et al, Risk factors for type 2 diabetes among female Pakistani immigrants: the InvaDiab-DEPLAN study on Pakistani immigrant women living in Oslo, Norway. *J Immigr Minor Health*, 2011;13(1):101-10.
- 14  
15 41. Ahmed E, El-Menyar A. South Asian Ethnicity and Cardiovascular Risk The Known, the Unknown, and the Paradox. *Angiology* 2015;66(5):405-15.
- 16  
17 42. Nair M, Prabhakaran D. Why Do South Asians Have High Risk for CAD? *Glob Heart*. 2012;7(4):307-14.
- 18  
19 43. MacMahon S, Peto R, Cutler J et al. Blood pressure, stroke, and coronary heart disease. Part 1, Prolonged differences in blood pressure: prospective observational studies corrected for the regression dilution bias. *Lancet*. 1990;335(8692):765-74.
- 20  
21 44. Kumar B, Meyer H, Wandel M et al. Ethnic differences in obesity among immigrants from developing countries, in Oslo, Norway. *Int J Obes*. 2006;30:684-90.
- 22  
23 45. Telle-Hjellset V, Raberg Kjollesdal MK, Bjorge B et al. The InnvaDiab-DE-PLAN study: a randomised controlled trial with a culturally adapted education programme improved the risk profile for type 2 diabetes in Pakistani immigrant women. *Br J Nutr*. 2013;109(3):529-38.
- 24  
25 46. Andersen E, Hostmark AT, Holme I, Anderssen SA. Intervention effects on physical activity and insulin levels in men of Pakistani origin living in Oslo: a randomised controlled trial. *J Immigr Minor Health*. 2013;15(1):101-10.
- 26  
27 47. Rush EC, Chandu V, Plank LD. Reduction of abdominal fat and chronic disease factors by lifestyle change in migrant Asian Indians older than 50 years. *Asia Pac J Clin Nutr*. 2007; 16(4):671-676.
- 28  
29  
30  
31  
32  
33  
34  
35  
36  
37  
38  
39  
40  
41  
42  
43  
44  
45  
46  
47  
48  
49

## Appendix

Table A1. Crude rates and age-adjusted HR of CVD by risk factors, Norwegian and South Asian men from the Norwegian cohort.

|                              | Norwegian      |                   |                                          |                  | South Asian    |                   |                                          |                  |
|------------------------------|----------------|-------------------|------------------------------------------|------------------|----------------|-------------------|------------------------------------------|------------------|
|                              | No. of persons | No. of CVD events | Crude rate/100 000 person-years (95% CI) | HR (95% CI)      | No. of persons | No. of CVD events | Crude rate/100 000 person-years (95% CI) | HR (95% CI)      |
| <b>Total</b>                 | 6385           | 379               | 703 (636-778)                            |                  | 1239           | 79                | 833 (668-1039)                           |                  |
| <b>Diabetes</b>              |                |                   |                                          |                  |                |                   |                                          |                  |
| <b>No</b>                    | 6167           | 339               | 649 (583-721)                            | 1.00             | 1088           | 59                | 704 (545-908)                            | 1.00             |
| <b>Yes</b>                   | 101            | 28                | 3936 (2718-5701)                         | 3.15 (2.14-4.65) | 103            | 16                | 2166 (1327-3536)                         | 1.61 (0.90-2.86) |
| <b>Missing</b>               | 117            | 12                | 539 (298-973)                            |                  | 48             | 4                 | 1110 (416-2956)                          |                  |
| <b>SBP</b>                   |                |                   |                                          |                  |                |                   |                                          |                  |
| <b>&lt;140</b>               | 4701           | 198               | 493 (429-566)                            | 1.00             | 1068           | 56                | 682 (525-886)                            | 1.00             |
| <b>140-159</b>               | 1373           | 130               | 1150 (969-1366)                          | 1.39 (1.10-1.74) | 150            | 19                | 1681 (1072-2636)                         | 1.44 (0.83-2.49) |
| <b>&gt;160</b>               | 296            | 51                | 2228 (1693-2932)                         | 1.76 (1.28-2.42) | 21             | 4                 | 2865 (1075-7634)                         | 1.51 (0.53-4.28) |
| <b>Missing</b>               | 15             | 0                 |                                          |                  | 0              | 0                 |                                          |                  |
| <b>TC/HDL ratio</b>          |                |                   |                                          |                  |                |                   |                                          |                  |
| <b>&lt;5</b>                 | 4284           | 207               | 568 (495-650)                            | 1.00             | 538            | 21                | 499 (325-765)                            | 1.00             |
| <b>≥ 5</b>                   | 2090           | 170               | 980 (843-1139)                           | 1.64 (1.34-2.00) | 698            | 58                | 1105 (854-1430)                          | 2.14 (1.30-3.52) |
| <b>Missing</b>               | 11             | 2                 | 2328 (582-9307)                          |                  | 3              | 0                 |                                          |                  |
| <b>TC</b>                    |                |                   |                                          |                  |                |                   |                                          |                  |
| <b>&lt; 5 mmol/L</b>         | 1930           | 68                | 410 (324-520)                            | 1.00             | 407            | 19                | 609 (389-955)                            | 1.00             |
| <b>≥ 5 mmol/L</b>            | 4444           | 309               | 830 (742-927)                            | 1.17 (0.90-1.53) | 830            | 60                | 945 (734-1217)                           | 1.49 (0.89-2.49) |
| <b>Missing</b>               | 11             | 2                 | 2328 (582-9307)                          |                  | 2              | 0                 |                                          |                  |
| <b>HDL</b>                   |                |                   |                                          |                  |                |                   |                                          |                  |
| <b>&lt; 1.00 mmol/L</b>      | 1032           | 78                | 915 (733-1142)                           | 1.00             | 525            | 34                | 855 (611-1197)                           | 1.00             |
| <b>≥ 1.00 mmol/L</b>         | 5343           | 299               | 660 (589-739)                            | 0.61 (0.47-0.78) | 711            | 45                | 821 (613-1099)                           | 0.99 (0.63-1.55) |
| <b>Missing</b>               | 10             | 2                 | 2608 (652-10427)                         |                  | 3              | 0                 |                                          |                  |
| <b>Current daily smokers</b> |                |                   |                                          |                  |                |                   |                                          |                  |
| <b>No</b>                    | 4706           | 231               | 578 (508-657)                            | 1.00             | 905            | 52                | 749 (571-983)                            | 1.00             |
| <b>Yes</b>                   | 1660           | 146               | 1062 (903-1248)                          | 1.86 (1.51-2.29) | 302            | 25                | 1088 (735-1610)                          | 1.43 (0.88-2.30) |
| <b>Missing</b>               | 19             | 2                 | 1236 (309-4941)                          |                  | 32             | 2                 | 831 (208-3323)                           |                  |

CI, confidence interval; CVD, cardiovascular disease; HDL, high density lipoprotein; HR, hazard ratio; TC, total cholesterol; SBP, systolic blood pressure

## APPENDIX

Table A2. Crude rates and age-adjusted HR of CVD by risk factors, Norwegian and South Asian women from the Norwegian cohort.

|                              | Norwegian      |                   |                                          |                  | South Asian    |                   |                                          |                  |
|------------------------------|----------------|-------------------|------------------------------------------|------------------|----------------|-------------------|------------------------------------------|------------------|
|                              | No. of persons | No. of CVD events | Crude rate/100 000 person-years (95% CI) | HR (95% CI)      | No. of persons | No. of CVD events | Crude rate/100 000 person-years (95% CI) | HR (95% CI)      |
| <b>Total</b>                 | 8015           | 259               | 378 (335-427)                            |                  | 967            | 26                | 341 (232-501)                            |                  |
| <b>Diabetes</b>              |                |                   |                                          |                  |                |                   |                                          |                  |
| <b>No</b>                    | 7657           | 237               | 361 (318-410)                            | 1.00             | 816            | 17                | 262 (163-422)                            | 1.00             |
| <b>Yes</b>                   | 105            | 11                | 1305 (723-2356)                          | 2.79 (1.52-5.11) | 100            | 9                 | 1212 (630-2329)                          | 2.74 (1.21-6.22) |
| <b>Missing</b>               | 253            | 11                | 539 (298-973)                            |                  | 51             | 0                 |                                          |                  |
| <b>SBP</b>                   |                |                   |                                          |                  |                |                   |                                          |                  |
| <b>&lt;140</b>               | 6823           | 151               | 257 (219-302)                            | 1.00             | 876            | 18                | 260 (164-412)                            | 1.00             |
| <b>140-159</b>               | 920            | 76                | 999 (798-1251)                           | 1.82 (1.37-2.43) | 67             | 4                 | 774 (291-2062)                           | 1.45 (0.48-4.34) |
| <b>&gt;160</b>               | 266            | 31                | 1450 (1020-2062)                         | 2.11 (1.42-3.15) | 23             | 4                 | 2378 (892-6335)                          | 2.42 (0.76-7.71) |
| <b>Missing</b>               | 6              | 1                 | 2128 (300-15106)                         |                  | 1              | 0                 |                                          |                  |
| <b>TC/HDL ratio</b>          |                |                   |                                          |                  |                |                   |                                          |                  |
| <b>&lt;5</b>                 | 7225           | 203               | 328 (286-376)                            | 1.00             | 749            | 17                | 287 (178-462)                            | 1.00             |
| <b>≥ 5</b>                   | 781            | 54                | 833 (638-1088)                           | 1.79 (1.33-2.42) | 215            | 9                 | 537 (279-1032)                           | 1.46 (0.65-3.30) |
| <b>Missing</b>               | 9              | 2                 | 3122 (781-12483)                         |                  |                | 0                 |                                          |                  |
| <b>TC</b>                    |                |                   |                                          |                  |                |                   |                                          |                  |
| <b>&lt; 5 mmol/L</b>         | 3004           | 44                | 169 (125-227)                            | 1.00             | 524            | 8                 | 193 (97-386)                             | 1.00             |
| <b>≥ 5 mmol/L</b>            | 5002           | 213               | 503 (440-576)                            | 1.40 (1.00-1.97) | 440            | 18                | 521 (328-826)                            | 1.54 (0.65-3.64) |
| <b>Missing</b>               | 9              | 2                 | 3122 (781-12483)                         |                  | 3              | 0                 |                                          |                  |
| <b>HDL</b>                   |                |                   |                                          |                  |                |                   |                                          |                  |
| <b>&lt; 1.2 mmol/L</b>       | 1057           | 52                | 587 (447-770)                            | 1.00             | 465            | 12                | 329 (187-578)                            | 1.00             |
| <b>≥1.2 mmol/L</b>           | 6949           | 205               | 344 (300-395)                            | 0.55 (0.40-0.74) | 499            | 14                | 354 (210-598)                            | 0.77 (0.36-1.69) |
| <b>Missing</b>               | 9              | 2                 | 3122 (781-12483)                         |                  | 3              | 0                 |                                          |                  |
| <b>Current daily smokers</b> |                |                   |                                          |                  |                |                   |                                          |                  |
| <b>No</b>                    | 5461           | 134               | 285 (241-338)                            | 1.00             | 883            | 24                | 344 (231-514)                            | 1.00             |
| <b>Yes</b>                   | 2510           | 119               | 564 (471-675)                            | 2.22 (1.73-2.84) | 13             | 0                 |                                          |                  |
| <b>Missing</b>               | 44             | 6                 | 1759 (790-3916)                          |                  | 71             | 2                 | 365 (91-1461)                            |                  |

CI, confidence interval; CVD, cardiovascular disease; HDL, high density lipoprotein; HR, hazard ratio; TC, total cholesterol; SBP, systolic blood pressure

## APPENDIX

Table A3. Crude rates and age-adjusted HR of CVD by risk factors, European and Indian New Zealand men from the New Zealand cohort.

|                              | European       |                   |                                          |                  | Indian         |                   |                                          |                  |
|------------------------------|----------------|-------------------|------------------------------------------|------------------|----------------|-------------------|------------------------------------------|------------------|
|                              | No. of persons | No. of CVD events | Crude rate/100 000 person-years (95% CI) | HR (95% CI)      | No. of persons | No. of CVD events | Crude rate/100 000 person-years (95% CI) | HR (95% CI)      |
| <b>Total</b>                 | 63 319         | 1 518             | 815 (775-857)                            |                  | 9 997          | 273               | 933 (828-1050)                           |                  |
| <b>Type 2 diabetes</b>       |                |                   |                                          |                  |                |                   |                                          |                  |
| <b>No</b>                    | 57 760         | 1 241             | 728 (689-770)                            | 1.00             | 7 641          | 158               | 712 (610-833)                            | 1.00             |
| <b>Yes</b>                   | 5 559          | 277               | 1739 (1546-1957)                         | 1.92 (1.68-2.19) | 2 356          | 115               | 1622 (1351-1947)                         | 1.72 (1.34-2.20) |
| <b>Missing</b>               | 0              |                   |                                          |                  | 0              |                   |                                          |                  |
| <b>SBP</b>                   |                |                   |                                          |                  |                |                   |                                          |                  |
| <b>&lt;140</b>               | 42 666         | 776               | 632 (589-678)                            | 1.00             | 7 888          | 188               | 805 (698-929)                            | 1.00             |
| <b>140-159</b>               | 16 417         | 514               | 1030 (945-1123)                          | 1.35 (1.20-1.51) | 1 723          | 68                | 1431 (1128-1814)                         | 1.37 (1.03-1.81) |
| <b>&gt;160</b>               | 4 236          | 228               | 1675 (1471-1908)                         | 2.03 (1.75-2.36) | 386            | 17                | 1462 (909-2352)                          | 1.22 (0.74-2.02) |
| <b>Missing</b>               | 0              |                   |                                          |                  | 0              |                   |                                          |                  |
| <b>TC/HDL ratio</b>          |                |                   |                                          |                  |                |                   |                                          |                  |
| <b>&lt;5</b>                 | 45 177         | 994               | 756 (711-805)                            | 1.00             | 6 379          | 178               | 926 (799-1072)                           | 1.00             |
| <b>≥ 5</b>                   | 18 139         | 524               | 955 (876-1040)                           | 1.58 (1.42-1.76) | 3 617          | 95                | 946 (774-1157)                           | 1.28 (1.00-1.65) |
| <b>Missing*</b>              | 3              | 0                 |                                          |                  | 1              | 0                 |                                          |                  |
| <b>TC</b>                    |                |                   |                                          |                  |                |                   |                                          |                  |
| <b>&lt; 5 mmol/L</b>         | 20 226         | 395               | 879 (797-970)                            | 1.00             | 4 450          | 103               | 841 (693-1020)                           | 1.00             |
| <b>≥ 5 mmol/L</b>            | 36 071         | 684               | 756 (702-815)                            | 1.01 (0.89-1.14) | 5 130          | 137               | 974 (824-1152)                           | 1.36 (1.05-1.76) |
| <b>Missing*</b>              | 7 022          | 439               | 861 (785-946)                            |                  | 417            | 33                | 1114 (792-1567)                          |                  |
| <b>HDL</b>                   |                |                   |                                          |                  |                |                   |                                          |                  |
| <b>&lt; 1.00 mmol/L</b>      | 2 325          | 55                | 986 (757-1284)                           | 1.00             | 561            | 15                | 1327 (800-2202)                          | 1.00             |
| <b>≥1.00 mmol/L</b>          | 10 920         | 323               | 891 (799-993)                            | 0.87 (0.66-1.17) | 1 231          | 39                | 1140 (833-1561)                          | 0.62 (0.33-1.14) |
| <b>Missing*</b>              | 50 074         | 1 140             | 789 (744-836)                            |                  | 8 205          | 219               | 886 (776-1011)                           |                  |
| <b>Current daily smokers</b> |                |                   |                                          |                  |                |                   |                                          |                  |
| <b>No</b>                    | 55 587         | 1 197             | 733 (692-776)                            | 1.00             | 9 105          | 242               | 913 (805-1035)                           | 1.00             |
| <b>Yes</b>                   | 7 731          | 321               | 1396 (1252-1558)                         | 2.29 (2.02-2.59) | 892            | 31                | 1123 (790-1597)                          | 1.45 (0.99-2.11) |
| <b>Missing</b>               | 1              | 0                 |                                          |                  | 0              |                   |                                          |                  |

CI, confidence interval; CVD, cardiovascular disease; HDL, high density lipoprotein; HR, hazard ratio; TC, total cholesterol; SBP, systolic blood pressure. \*The number of missing information is different for TC/HDL ratio than for TC and HDL separately. This is because the risk factors included in the PREDICT risk assessment (age, gender, smoking, diabetes, systolic BP and total cholesterol/HDL ratio) was compulsory for assessing risk. Risk factors not compulsory for risk assessment consequently have more missing information (e.g. the HDL and TC)

## APPENDIX

Table A4. Crude rates and age-adjusted HR of CVD by risk factors, European and Indian New Zealand women from the New Zealand cohort.

|                              | European       |                   |                                          |                  | Indian         |                   |                                          |                  |
|------------------------------|----------------|-------------------|------------------------------------------|------------------|----------------|-------------------|------------------------------------------|------------------|
|                              | No. of persons | No. of CVD events | Crude rate/100 000 person-years (95% CI) | HR               | No. of persons | No. of CVD events | Crude rate/100 000 person-years (95% CI) | HR               |
| <b>Total</b>                 | 49 094         | 757               | 528 (492-567)                            |                  | 7 039          | 106               | 531 (439-643)                            |                  |
| <b>Type 2 diabetes</b>       |                |                   |                                          |                  |                |                   |                                          |                  |
| <b>No</b>                    | 44 880         | 635               | 485 (448-524)                            | 1.00             | 5 010          | 50                | 358 (271-472)                            | 1.00             |
| <b>Yes</b>                   | 4 214          | 122               | 994 (832-1187)                           | 1.93 (1.59-2.35) | 2 029          | 56                | 936 (720-1216)                           | 2.29 (1.55-3.38) |
| <b>Missing</b>               | 0              |                   |                                          |                  | 0              |                   |                                          |                  |
| <b>SBP</b>                   |                |                   |                                          |                  |                |                   |                                          |                  |
| <b>&lt;140</b>               | 32 178         | 395               | 436 (395-481)                            | 1.00             | 5 370          | 56                | 371 (285-482)                            | 1.00             |
| <b>140-159</b>               | 13 019         | 258               | 646 (572-730)                            | 1.22 (1.04-1.44) | 1 281          | 34                | 919 (656-1286)                           | 2.11 (1.37-3.25) |
| <b>&gt;160</b>               | 3 896          | 104               | 813 (671-985)                            | 1.42 (1.14-1.77) | 388            | 16                | 1388 (851-2266)                          | 2.99 (1.70-5.29) |
| <b>Missing</b>               | 1              | 0                 |                                          |                  | 0              |                   |                                          |                  |
| <b>TC/HDL ratio</b>          |                |                   |                                          |                  |                |                   |                                          |                  |
| <b>&lt;5</b>                 | 42 800         | 626               | 507 (469-549)                            | 1.00             | 5 895          | 89                | 527 (428-648)                            | 1.00             |
| <b>≥ 5</b>                   | 6 289          | 131               | 658 (555-781)                            | 1.42 (1.17-1.71) | 1 143          | 17                | 559 (347-898)                            | 1.11 (0.66-1.88) |
| <b>Missing*</b>              | 5              | 0                 |                                          |                  | 1              | 0                 |                                          |                  |
| <b>TC</b>                    |                |                   |                                          |                  |                |                   |                                          |                  |
| <b>&lt; 5 mmol/L</b>         | 10 940         | 127               | 515 (433-613)                            | 1.00             | 3 277          | 57                | 639 (493-828)                            | 1.00             |
| <b>≥ 5 mmol/L</b>            | 32 974         | 415               | 516 (469-569)                            | 0.96 (0.79-1.17) | 3 515          | 37                | 398 (289-550)                            | 0.62 (0.41-0.95) |
| <b>Missing*</b>              | 5 180          | 215               | 561 (491-641)                            |                  | 247            | 12                | 689 (391-1212)                           |                  |
| <b>HDL</b>                   |                |                   |                                          |                  |                |                   |                                          |                  |
| <b>&lt; 1.2 mmol/L</b>       | 1 852          | 26                | 529 (360-776)                            | 1.00             | 568            | 9                 | 781 (406-1501)                           | 1.00             |
| <b>≥1.2 mmol/L</b>           | 7 985          | 149               | 578 (492-678)                            | 0.97 (0.64-1.47) | 866            | 14                | 600 (355-1013)                           | 0.75 (0.32-1.77) |
| <b>Missing*</b>              | 39 257         | 582               | 517 (477-561)                            |                  | 5 605          | 83                | 504 (406-625)                            |                  |
| <b>Current daily smokers</b> |                |                   |                                          |                  |                |                   |                                          |                  |
| <b>No</b>                    | 43 994         | 595               | 466 (430-505)                            | 1.00             | 6 973          | 104               | 526 (434-638)                            | 1.00             |
| <b>Yes</b>                   | 5 100          | 162               | 1038 (890-1211)                          | 2.74 (2.30-3.27) | 66             | 2                 | 1090 (272-4357)                          | 2.60 (0.64-10.0) |
| <b>Missing</b>               | 0              |                   |                                          |                  | 0              |                   |                                          |                  |

CI, confidence interval; CVD, cardiovascular disease; HDL, high density lipoprotein; HR, hazard ratio; TC, total cholesterol; SBP, systolic blood pressure. \*The number of missing information is different for TC/HDL ratio than for TC and HDL separately. This is because the risk factors included in the PREDICT risk assessment (age, gender, smoking, diabetes, systolic BP and total cholesterol/HDL ratio) was compulsory for assessing risk. Risk factors not compulsory for risk assessment consequently have more missing information (e.g. the HDL and TC).



STROBE 2007 (v4) Statement—Checklist of items that should be included in reports of cohort studies

| Section/Topic             | Item # | Recommendation                                                                                                                                                                       | Reported on page # |
|---------------------------|--------|--------------------------------------------------------------------------------------------------------------------------------------------------------------------------------------|--------------------|
| Title and abstract        | 1      | (a) Indicate the study’s design with a commonly used term in the title or the abstract                                                                                               | 1,2                |
|                           |        | (b) Provide in the abstract an informative and balanced summary of what was done and what was found                                                                                  | 2-3                |
| <b>Introduction</b>       |        |                                                                                                                                                                                      |                    |
| Background/rationale      | 2      | Explain the scientific background and rationale for the investigation being reported                                                                                                 | 4-5                |
| Objectives                | 3      | State specific objectives, including any prespecified hypotheses                                                                                                                     | 5                  |
| <b>Methods</b>            |        |                                                                                                                                                                                      |                    |
| Study design              | 4      | Present key elements of study design early in the paper                                                                                                                              | 5                  |
| Setting                   | 5      | Describe the setting, locations, and relevant dates, including periods of recruitment, exposure, follow-up, and data collection                                                      | 5-8                |
| Participants              | 6      | (a) Give the eligibility criteria, and the sources and methods of selection of participants. Describe methods of follow-up                                                           | 6-8                |
|                           |        | (b) For matched studies, give matching criteria and number of exposed and unexposed                                                                                                  |                    |
| Variables                 | 7      | Clearly define all outcomes, exposures, predictors, potential confounders, and effect modifiers. Give diagnostic criteria, if applicable                                             | 6-9                |
| Data sources/ measurement | 8*     | For each variable of interest, give sources of data and details of methods of assessment (measurement). Describe comparability of assessment methods if there is more than one group | 5-9                |
| Bias                      | 9      | Describe any efforts to address potential sources of bias                                                                                                                            | 10                 |
| Study size                | 10     | Explain how the study size was arrived at                                                                                                                                            | 6-8,11             |
| Quantitative variables    | 11     | Explain how quantitative variables were handled in the analyses. If applicable, describe which groupings were chosen and why                                                         | 9-10               |
| Statistical methods       | 12     | (a) Describe all statistical methods, including those used to control for confounding                                                                                                | 9-10               |
|                           |        | (b) Describe any methods used to examine subgroups and interactions                                                                                                                  | 9-10               |
|                           |        | (c) Explain how missing data were addressed                                                                                                                                          | 10                 |
|                           |        | (d) If applicable, explain how loss to follow-up was addressed                                                                                                                       | 10                 |
|                           |        | (e) Describe any sensitivity analyses                                                                                                                                                | 10                 |
| <b>Results</b>            |        |                                                                                                                                                                                      |                    |

|                  |     |                                                                                                                                                                                                   |                                                                                                                                                                                                                                                                                                    |
|------------------|-----|---------------------------------------------------------------------------------------------------------------------------------------------------------------------------------------------------|----------------------------------------------------------------------------------------------------------------------------------------------------------------------------------------------------------------------------------------------------------------------------------------------------|
| Participants     | 13* | (a) Report numbers of individuals at each stage of study—eg numbers potentially eligible, examined for eligibility, confirmed eligible, included in the study, completing follow-up, and analysed | 11                                                                                                                                                                                                                                                                                                 |
|                  |     | (b) Give reasons for non-participation at each stage                                                                                                                                              | We did not have information about reasons for non-participation in CONOR, but participation rates are given on page 7 and the possibility of self-selection bias is discussed on page 17. This was not relevant for the PREDICT cohort since it was based on contact with the primary health care. |
|                  |     | (c) Consider use of a flow diagram                                                                                                                                                                | Different persons were involved in the exclusion of participants, so it was easier to describe this process in text.                                                                                                                                                                               |
| Descriptive data | 14* | (a) Give characteristics of study participants (eg demographic, clinical, social) and information on exposures and potential confounders                                                          | 11-14                                                                                                                                                                                                                                                                                              |
|                  |     | (b) Indicate number of participants with missing data for each variable of interest                                                                                                               | 27-30 (Tables A1-A4 in the appendices)                                                                                                                                                                                                                                                             |
|                  |     | (c) Summarise follow-up time (eg, average and total amount)                                                                                                                                       | 12-13 (Table 1)                                                                                                                                                                                                                                                                                    |
| Outcome data     | 15* | Report numbers of outcome events or summary measures over time                                                                                                                                    | 14                                                                                                                                                                                                                                                                                                 |

1  
2  
3  
4  
5  
6  
7  
8  
9  
10  
11  
12  
13  
14  
15  
16  
17  
18  
19  
20  
21  
22  
23  
24  
25  
26  
27  
28  
29  
30  
31  
32  
33  
34  
35  
36  
37  
38  
39  
40  
41  
42  
43  
44  
45  
46  
47  
48  
49

|                          |    |                                                                                                                                                                                                              |                                                  |
|--------------------------|----|--------------------------------------------------------------------------------------------------------------------------------------------------------------------------------------------------------------|--------------------------------------------------|
| Main results             | 16 | (a) Give unadjusted estimates and, if applicable, confounder-adjusted estimates and their precision (eg, 95% confidence interval). Make clear which confounders were adjusted for and why they were included | 15-16                                            |
|                          |    | (b) Report category boundaries when continuous variables were categorized                                                                                                                                    | 13 (in table legend) and 26-29                   |
|                          |    | (c) If relevant, consider translating estimates of relative risk into absolute risk for a meaningful time period                                                                                             |                                                  |
| Other analyses           | 17 | Report other analyses done—eg analyses of subgroups and interactions, and sensitivity analyses                                                                                                               | Sensitivity analyses are reported on page 15,17. |
| <b>Discussion</b>        |    |                                                                                                                                                                                                              |                                                  |
| Key results              | 18 | Summarise key results with reference to study objectives                                                                                                                                                     | 17                                               |
| <b>Limitations</b>       |    |                                                                                                                                                                                                              |                                                  |
| Interpretation           | 20 | Give a cautious overall interpretation of results considering objectives, limitations, multiplicity of analyses, results from similar studies, and other relevant evidence                                   | 17-22                                            |
| Generalisability         | 21 | Discuss the generalisability (external validity) of the study results                                                                                                                                        | 18                                               |
| <b>Other information</b> |    |                                                                                                                                                                                                              |                                                  |
| Funding                  | 22 | Give the source of funding and the role of the funders for the present study and, if applicable, for the original study on which the present article is based                                                | 23                                               |

\*Give information separately for cases and controls in case-control studies and, if applicable, for exposed and unexposed groups in cohort and cross-sectional studies.

**Note:** An Explanation and Elaboration article discusses each checklist item and gives methodological background and published examples of transparent reporting. The STROBE checklist is best used in conjunction with this article (freely available on the Web sites of PLoS Medicine at <http://www.plosmedicine.org/>, Annals of Internal Medicine at <http://www.annals.org/>, and Epidemiology at <http://www.epidem.com/>). Information on the STROBE Initiative is available at [www.strobe-statement.org](http://www.strobe-statement.org).

# BMJ Open

## Can traditional risk factors explain the higher risk of cardiovascular disease in South Asians compared to Europeans in Norway and New Zealand? Two cohort studies

|                                 |                                                                                                                                                                                                                                                                                                                                                                                                                                                                                                                                                                                                                                                                                                                                                                                                                                                                                                  |
|---------------------------------|--------------------------------------------------------------------------------------------------------------------------------------------------------------------------------------------------------------------------------------------------------------------------------------------------------------------------------------------------------------------------------------------------------------------------------------------------------------------------------------------------------------------------------------------------------------------------------------------------------------------------------------------------------------------------------------------------------------------------------------------------------------------------------------------------------------------------------------------------------------------------------------------------|
| Journal:                        | <i>BMJ Open</i>                                                                                                                                                                                                                                                                                                                                                                                                                                                                                                                                                                                                                                                                                                                                                                                                                                                                                  |
| Manuscript ID                   | bmjopen-2017-016819.R1                                                                                                                                                                                                                                                                                                                                                                                                                                                                                                                                                                                                                                                                                                                                                                                                                                                                           |
| Article Type:                   | Research                                                                                                                                                                                                                                                                                                                                                                                                                                                                                                                                                                                                                                                                                                                                                                                                                                                                                         |
| Date Submitted by the Author:   | 09-Jun-2017                                                                                                                                                                                                                                                                                                                                                                                                                                                                                                                                                                                                                                                                                                                                                                                                                                                                                      |
| Complete List of Authors:       | Rabanal, Kjersti; Nasjonalt folkehelseinstitutt, Domain for Mental and Physical Health<br>Meyer, Haakon; Norwegian Institute of Public Health, Epidemiology<br>Tell, Grethe; University of Bergen, Department of Global Public Health and Primary Care<br>Igland, Jannicke; Faculty of Medicine and Dentistry, University of Bergen, Global Public Health and Primary Care<br>Pylypchuk, Romana; University of Auckland, Epidemiology and Biostatistics, School of Population Health<br>Mehta, Suneela; University of Auckland, Epidemiology and Biostatistics, School of Population Health<br>Kumar, Bernadette; Oslo University Hospital, Norwegian Center for Minority Health Research<br>Jenum, Anne; University of Oslo,<br>Selmer, Randi; Norwegian Institute of Public Health, Department of Pharmacoepidemiology<br>Jackson, Rod; University of Auckland, Epidemiology and Biostatistics |
| <b>Primary Subject Heading</b>: | Epidemiology                                                                                                                                                                                                                                                                                                                                                                                                                                                                                                                                                                                                                                                                                                                                                                                                                                                                                     |
| Secondary Subject Heading:      | Cardiovascular medicine, Public health                                                                                                                                                                                                                                                                                                                                                                                                                                                                                                                                                                                                                                                                                                                                                                                                                                                           |
| Keywords:                       | cardiovascular disease, risk factors, South Asians, ethnicity, prospective, cohort                                                                                                                                                                                                                                                                                                                                                                                                                                                                                                                                                                                                                                                                                                                                                                                                               |
|                                 |                                                                                                                                                                                                                                                                                                                                                                                                                                                                                                                                                                                                                                                                                                                                                                                                                                                                                                  |

SCHOLARONE™  
Manuscripts

1  
2  
3  
4 **Can traditional risk factors explain the higher risk of cardiovascular disease in South Asians**  
5 **compared to Europeans in Norway and New Zealand? Two cohort studies**  
6

7 Kjersti S Rabanal<sup>a</sup>, Haakon E Meyer<sup>a, b</sup>, Grethe S Tell<sup>c, d</sup>, Jannicke Igland<sup>d</sup>, Romana Pylypchuk<sup>e</sup>,  
8 Suneela Mehta<sup>e</sup>, Bernadette Kumar<sup>f</sup>, Anne Karen Jenum<sup>g</sup>, Randi M Selmer<sup>a</sup>, Rod Jackson<sup>e</sup>  
9

10  
11 <sup>a</sup> Domain for Mental and Physical Health, Norwegian Institute of Public Health, Oslo, Norway  
12

13 <sup>b</sup> Department of Community Medicine, Institute of Health and Society, University of Oslo,  
14 Oslo, Norway  
15

16 <sup>c</sup> Domain for Health Data and Digitalisation, Norwegian Institute of Public Health, Bergen,  
17 Norway  
18

19 <sup>d</sup> Department of Global Public Health and Primary Care, University of Bergen, Norway  
20

21 <sup>e</sup> School of Population Health, University of Auckland, Auckland, New Zealand  
22

23 <sup>f</sup> Norwegian Center for Minority Health Research, Oslo, Norway  
24

25 <sup>g</sup> Institute of Health and Society, Faculty of Health and Society, University of Oslo, Oslo,  
26 Norway  
27  
28  
29

30 **Corresponding author**

31 Kjersti S Rabanal

32 Address: Norwegian Institute of Public Health, P.O. Box 4404, Nydalen, 0403 Oslo, Norway

33 Telephone number: +47 22078118

34 E-mail: [kjersti.stormark.rabanal@fhi.no](mailto:kjersti.stormark.rabanal@fhi.no), [kjersti.rabanal@hotmail.com](mailto:kjersti.rabanal@hotmail.com)  
35  
36

37 Wordcount, abstract: 298

38 Wordcount, manuscript text: 4615  
39  
40

41 Keywords: cardiovascular disease, risk factors, South Asians, ethnicity, prospective, cohort  
42  
43  
44  
45  
46  
47  
48  
49  
50  
51  
52  
53  
54  
55  
56  
57  
58  
59  
60

**ABSTRACT**

**Objectives** The objective was to prospectively examine potential differences in the risk of first cardiovascular disease (CVD) events between South Asians and Europeans living in Norway and New Zealand, and to investigate whether traditional risk factors could explain any differences.

**Methods** We included participants (30-74 years) without prior CVD in a Norwegian (n=16 606) and a New Zealand (n=129 449) cohort. Ethnicity and cardiovascular risk factor information was linked with hospital registry data and cause of death registries to identify subsequent CVD events. We used Cox proportional hazards regression to investigate the relationship between risk factors and subsequent CVD for South Asians and Europeans, and to calculate age-adjusted hazard ratios (HRs) for CVD in South Asians versus Europeans in the two cohorts separately. We sequentially added the major CVD risk factors (blood pressure, lipids, diabetes and smoking) to study their explanatory role in observed ethnic CVD risk differences.

**Results** South Asians had higher total cholesterol (TC)/high density lipoprotein (HDL) ratio and more diabetes at baseline than Europeans, but lower blood pressure and smoking levels. South Asians had increased age-adjusted risk of CVD compared to Europeans (87-92% higher in the Norwegian cohort and 42-75% higher in the New Zealand cohort) and remained with significantly increased risk after adjusting for all major CVD risk factors. Adjusted HRs for South Asians versus Europeans in the Norwegian cohort were 1.57; 95% CI 1.19-2.07 in men and 1.76; 95% CI 1.09-2.82 in women. Corresponding figures for the New Zealand cohort were 1.64; 95% CI 1.43-1.88 in men and 1.39; 95% CI 1.11-1.73 in women.

1  
2  
3 **Conclusion** Differences in TC/HDL ratio and diabetes appear to explain some of the excess  
4  
5 risk of CVD in South Asians compared to Europeans. Preventing dyslipidaemia and diabetes  
6  
7 in South Asians may therefore help reduce their excess risk of CVD.  
8  
9

#### 10 11 12 13 **Strengths and limitations of this study**

- 14  
15 • This is one of few prospective investigations of cardiovascular disease and its risk factors  
16 in South Asian populations living in Western countries.  
17
- 18  
19 • A special feature is the inclusion of prospective data from two different countries  
20 enhancing the external validity of the findings.  
21
- 22  
23 • The two cohorts differed in how participants were recruited and how information about  
24 risk factor levels was collected at baseline.  
25
- 26  
27 • A limited number of South Asians in the Norwegian cohort and short follow up time in  
28 the New Zealand cohort restricted the statistical power in our analyses.  
29  
30  
31  
32  
33  
34  
35  
36  
37  
38  
39  
40  
41  
42  
43  
44  
45  
46  
47  
48  
49  
50  
51  
52  
53  
54  
55  
56  
57  
58  
59  
60

## INTRODUCTION

Immigrants from South Asia (countries in the Indian subcontinent such as India, Pakistan, Sri Lanka and Bangladesh) who have settled in Western countries have increased risk of cardiovascular disease (CVD) compared to their host populations of European origin[1]. This excess risk has been documented in several countries, especially the increased risk of coronary heart disease (CHD)[2-4]. We recently found that South Asian immigrants in Norway had more than two-fold higher risk of acute myocardial infarction (AMI) than ethnic Norwegians and an increased risk of stroke (26% higher in men and 58% higher in women)[5]. Collaborators in New Zealand found a higher risk of CVD in Indians compared to the European New Zealand population[6].

The mechanisms underlying the increased risk of CVD in South Asian populations are mostly unknown[1]. Few studies have examined the prospective relationship between CVD risk factors and subsequent CVD among South Asians[4, 7-9], despite the urgent need for such studies being addressed for more than ten years ago[10]. The two large and multinational case-control studies, Interheart[11] and Interstroke,[12] indicate that different populations share the same risk factors and that the relationship between risk factors and CVD is similar in different populations around the world. The Interheart study also concluded that the earlier age of AMI in South Asians can be largely attributed to higher risk factor levels at younger ages[13]. However, the Interheart and Interstroke studies are both case-control studies. In both Norway and New Zealand, South Asians have been found to have similar or higher mean total cholesterol (TC) to high density lipoprotein (HDL) ratio and higher prevalence of diabetes compared to the European majority populations[14-17]. However, they also have lower levels of smoking (especially women) and mean systolic blood pressure (SBP) than the European majority populations. Whether the higher risk of CVD among South



1  
2  
3 Asians in Norway and New Zealand is due to higher levels of certain risk factors have not  
4  
5 previously been studied.  
6  
7

8  
9 Due to the dearth of prospective data on the relationship between risk factors and CVD  
10  
11 among South Asians, we aimed to prospectively examine possible differences in the risk of a  
12  
13 first CVD event between South Asians and Europeans using cohort studies from Norway and  
14  
15 New Zealand, and to examine whether traditional CVD risk factors could explain such  
16  
17 differences. Since the two cohorts differ in several aspects we do not intend to compare the  
18  
19 two cohorts directly, but mainly focus on within-country comparisons.  
20  
21  
22

## 23 **MATERIAL AND METHODS**

### 24 **The New Zealand PREDICT-CVD cohort**

25  
26 We used data from the PREDICT-CVD cohort, collected through use of the PREDICT web-  
27  
28 based decision support program in New Zealand for the assessment and management of  
29  
30 CVD risk during primary health care consultations[18]. The study methods and data  
31  
32 definitions are described in detail elsewhere[18, 19]. In short, the software has been  
33  
34 integrated with commonly used primary care management systems, and allows  
35  
36 systematically coded CVD risk data to be automatically and anonymously extracted from  
37  
38 patients' electronic medical records and augmented where required by primary care  
39  
40 staff[18, 19]. The cardiovascular profile data was subsequently linked, using an encrypted  
41  
42 national health identifier number to national and regional health datasets with information  
43  
44 about hospitalisations, deaths, publicly funded drug dispensing and laboratory test claims  
45  
46 and results[19].  
47  
48  
49  
50  
51  
52

53  
54 The PREDICT software is used in around 35% of New Zealand primary care practices mainly  
55  
56 in the Auckland and Northland regions,[19] which serve around 1.7 million people,  
57  
58  
59  
60

1  
2  
3 representing around 37 % of the New Zealand population[20]. Any patient with their CVD  
4  
5 risk assessed by a general practitioner (GP) or practice nurse into online PREDICT-CVD forms  
6  
7 are included in the PREDICT cohort.  
8  
9

10  
11 New Zealand CVD risk management guidelines recommend that all men over 45 years and all  
12  
13 women over 55 years have a regular CVD risk assessment[21]. Specified high-CVD risk  
14  
15 groups, including those of South Asian ethnicity, are recommended to undergo a risk  
16  
17 assessment ten years earlier than the general population.  
18  
19

20  
21 We used PREDICT data from August 2002 until September 2012. Members of the cohort  
22  
23 were enrolled and examined continuously throughout this period via their contact with the  
24  
25 primary health care. We included individuals aged 30 to 74 years since the dataset was  
26  
27 comprised of people undergoing a risk assessment based on a Framingham risk score  
28  
29 intended for people in this age group[22]. Using information from the GP, hospital  
30  
31 discharges and medication dispensing, we excluded persons with a history of CVD (CHD  
32  
33 (including angina), stroke, TIA, peripheral vascular disease (PVD), percutaneous coronary  
34  
35 intervention (PCI) or coronary artery bypass grafting (CABG)), or atrial fibrillation at baseline  
36  
37 (n=24 537), and people with overt renal disease, those who had eGFR  $\leq$  29 and those with  
38  
39 prior hospitalisations for congestive heart failure or who were on loop diuretics at baseline  
40  
41 (n=1582). Only subjects with European or Indian background were included. The risk factor  
42  
43 measurements in the PREDICT cohort were extracted from a standardised electronic  
44  
45 template that primary care practitioners completed. The SBP was based on the mean of the  
46  
47 last two recordings done by the GP or practice nurse, in most cases with a manual mercury  
48  
49 sphygmomanometer. Blood lipid and glucose or HbA1c measurements were carried out in  
50  
51 the community laboratories routinely used by general practitioners and smoking status and  
52  
53  
54  
55  
56  
57  
58  
59  
60

1  
2  
3 other risk factor data was measured using a standard questionnaire completed by a primary  
4  
5 care practitioner.  
6  
7

### 8 **Cohort of Norway**

9  
10 We included participants from three surveys conducted during 2000-2002 in Oslo, Norway;  
11  
12 The Oslo Health Study (HUBRO), The Oslo Immigrant Health Study (I-HUBRO) and The  
13  
14 Romsås in Motion study (MoRo II) (n=26 709), which are part of the Cohort of Norway  
15  
16 (CONOR)[23]; a collection of health data and blood samples from several Norwegian health  
17  
18 surveys. Participation rates for the three studies were 40-46%[23].  
19  
20  
21

22  
23 All CONOR surveys followed the same standard procedure for collection of data from self-  
24  
25 administered questionnaires, physical measurements and blood samples. The CONOR  
26  
27 questionnaire provided information on self-reported diabetes, smoking, use of blood  
28  
29 pressure and/or lipid lowering medication and family history of CVD. All participants  
30  
31 attended a clinical examination and non-fasting venous blood samples were drawn. SBP was  
32  
33 measured by an automatic device (DINAMAP, Criticon, Tampa, FL,USA) after 2 minutes of  
34  
35 seated resting. Three recordings were made at 1-min intervals. For the analyses we used the  
36  
37 average of the second and third SBP measurements. The blood samples were subsequently  
38  
39 measured for total cholesterol (TC) and HDL cholesterol[23].  
40  
41  
42  
43  
44

45  
46 Using an 11-digit personal identifier, CONOR data were linked to hospitalizations and deaths  
47  
48 in the Cardiovascular Disease in Norway (CVDNOR) project, 1994-2009[24,25]. This enabled  
49  
50 us to follow CONOR participants for CVD outcomes (hospitalizations or deaths) occurring  
51  
52 after CONOR examination through December 31<sup>st</sup> 2009.  
53  
54

55  
56 We included participants aged 30-74 years old at baseline (n=3 871 excluded) to ensure  
57  
58 comparable samples between the Norwegian and New Zealand data. We excluded  
59  
60

1  
2  
3 participants not born in Norway or South Asia (n=5 651 excluded), pregnant women (n=197),  
4  
5 and participants with prior CVD ((coronary heart disease (CHD), cerebrovascular disease,  
6  
7 atherosclerotic disease, transient ischemic attack (TIA) and heart failure (HF)) (n=353) or  
8  
9 atrial fibrillation (n=31) registered in the hospital data before screening.  
10  
11

### 12 13 **Outcomes**

14  
15 In both cohorts, we identified the first CVD event (non-fatal and fatal) using main or  
16  
17 secondary diagnoses from hospital discharge data or the underlying cause of death from  
18  
19 national mortality statistics. The International Classification of Diseases (ICD) codes  
20  
21 (versions 9 and/or 10) were used to define outcome variables. New Zealand hospitals used  
22  
23 an Australian modification of the ICD-10 classification called ICD10-AM[26].  
24  
25  
26

27  
28 CVD in both cohorts included the following conditions: CHD; HF; cerebrovascular disease  
29  
30 including TIA; diseases of arteries, arterioles and capillaries including atherosclerosis,  
31  
32 aneurysm and dissection as well as embolism and thrombosis. For the Norwegian cohort this  
33  
34 included the codes: ICD9: 410-414, 428, 430-438, 440, 441 except 441.7, 442, 443.9, 444;  
35  
36 ICD10:I20-I25, I50, I60-I69, I70-I79, G45. The CVD variable in the New Zealand PREDICT  
37  
38 cohort included the same ICD10 codes as just listed, and also some additional ICD10-codes  
39  
40 (I469, J81, G460-G468, Z951, Z955, Z958, Z959) plus a list of procedure codes (too many to  
41  
42 be listed here). The PREDICT CVD outcome has been described elsewhere[19].  
43  
44  
45  
46

### 47 48 **Ethnicity**

49  
50 Ethnicity in the New Zealand PREDICT data was based on two sources: 1) the PREDICT  
51  
52 template filled in by the GP and 2) the National Health Index dataset, both according to pre-  
53  
54 defined categories. A prioritising algorithm was used to agree on one ethnicity in case of  
55  
56 multiple ethnicities recorded (details can be found in a supplementary file entitled the VIEW  
57  
58  
59  
60

1  
2  
3 Ethnicity Protocol). The system for coding ethnicity in New Zealand enables identification of  
4  
5 Indian people, who account for approximately 90% of South Asian people living in New  
6  
7 Zealand. The remaining South Asian ethnic groups are classified as part of the “Other Asian”  
8  
9 ethnic group in national health data and so could not be included here. Indian people can  
10  
11 include both immigrants and individuals who have been born in New Zealand with parents  
12  
13 (or older generations) who have immigrated. The majority of this group are immigrants since  
14  
15 76.5% of the people who identified themselves with the Indian ethnic group in New Zealand  
16  
17 in 2013 were born overseas[27].  
18  
19  
20  
21

22  
23 For the Norwegian cohort, we used country of birth merged into larger world regions to  
24  
25 define ethnicity[28]. We defined South Asians as individuals who migrated to Norway from  
26  
27 Bangladesh, Myanmar, Sri Lanka, Pakistan, India or Nepal[28]. The largest share of South  
28  
29 Asians in this dataset (95%) came from the HUBRO or the I-HUBRO study. HUBRO and I-  
30  
31 HUBRO combined included 1145 Sri Lankans and 780 Pakistanis,[29] indicating that about  
32  
33 50% of the South Asian group (n=2206) in the present study are Sri Lankans and 35% are  
34  
35 Pakistanis.  
36  
37  
38  
39

40  
41 In general, we refer to the ethnic groups as South Asians (South Asians in Norway and/or  
42  
43 Indians in New Zealand) and Europeans (ethnic Norwegians and/or New-Zealanders with  
44  
45 ethnic European origin). Most European New Zealanders are of British and Irish ancestry, of  
46  
47 whom about three quarters were born in New Zealand.  
48  
49

### 50 **Statistical analysis**

51  
52 Baseline characteristics are reported as mean values with standard deviations for continuous  
53  
54 variables and fractions for categorical variables. We tested the differences between the  
55  
56 ethnic groups adjusted for age by analysis of covariance. We used Cox regression models to  
57  
58  
59  
60

1  
2  
3 examine the prospective relationship between baseline risk factors (blood pressure, lipids,  
4 diabetes and smoking) and time until subsequent first CVD event. People were censored if  
5 they died from other causes (n=961 in PREDICT and n=276 in CONOR). Cox regression was  
6 also used to calculate hazard ratios (HRs) for CVD in South Asians versus Europeans using  
7 ethnicity as the exposure variable and adjusting for risk factors. The order we added the risk  
8 factors to the model was based on the distribution of risk factors in the subpopulations. This  
9 meant that we first introduced the risk factors that were more prevalent among South  
10 Asians compared to Europeans (diabetes and TC/HDL ratio) and then added the two less  
11 prevalent risk factors (SBP and smoking). Additional analyses where we added the risk  
12 factors in different orders and looked at each risk factor in separate models with only age as  
13 covariate did not change the conclusions. Proportional hazards assumptions were tested  
14 using scaled Schoenfeld residuals[30]. All analyses were stratified by sex and ethnicity,  
15 except for the analyses where ethnicity was the exposure variable in which we only stratified  
16 by sex. Only complete cases were included in the analyses. Stata 14 was used for analyses in  
17 the Norwegian data and Stata 11 for analysis in the New Zealand data.

18  
19  
20  
21  
22  
23  
24  
25  
26  
27  
28  
29  
30  
31  
32  
33  
34  
35  
36  
37  
38  
39 To check whether the use of BP medication at baseline would impact the analyses where  
40 SBP were included, we repeated the Cox regression analyses excluding people using  
41 antihypertensive medication at baseline. Correspondingly, we also repeated the Cox-  
42 regression analyses for TC/HDL ratio without people using lipid lowering medication at  
43 baseline. In addition, since excluding those at highest risk could potentially impact the  
44 sensitivity analyses, we also adjusted for medication use without excluding anyone from the  
45 analyses.

## Ethics

The current project was approved by the Regional Committee for Medical Research Ethics, Health Region West. The PREDICT study was approved by the Northern Region Ethics Committee Y in 2003 (AKY/03/12/134), and later annually approved by the National Multi Region Ethics Committee since 2007 (MEC07/19/EXP)[19]. Each individual CONOR study was approved by the Norwegian Data Inspectorate and evaluated by the Regional Committee for Medical Research ethics[31]. Both datasets contained anonymized data.

## RESULTS

### Baseline characteristics

The final study sample from the New Zealand cohort consisted of 129 449 individuals (43% women) of European (87%) or Indian ethnicity (13%) with no history of CVD, atrial fibrillation or renal disease. Correspondingly for the Norwegian cohort, the final study sample consisted of 16 606 individuals (54% women) born in either Norway (87%) or South Asia (13%) with no history of CVD or atrial fibrillation.

At baseline, the Norwegian cohort was younger than the New Zealand cohort, and New Zealand women were older than New Zealand men (Table 1). In both cohorts, South Asians were younger than Europeans.

Table 1. Baseline characteristics (unadjusted) of the Norwegian and New Zealand participants. Participants free of prior CVD.

|                                           | <i>New Zealand cohort</i> |              |              |              |
|-------------------------------------------|---------------------------|--------------|--------------|--------------|
|                                           | Men                       |              | Women        |              |
|                                           | European                  | Indian       | European     | Indian       |
| <i>N</i>                                  | 63 319                    | 9 997        | 49 094       | 7 039        |
| Age (years)                               | 55.0 (9.3)                | 47.4 (9.7)   | 58.7 (8.7)   | 52.9 (8.5)   |
| Age range                                 | 30.0 - 74.0               | 30.0 - 74.0  | 30.0 - 74.0  | 30.0 - 74.0  |
| TC (mmol/L)                               | 5.36 (1.1)                | 5.09 (1.1)   | 5.68 (1.1)   | 5.04 (1.0)   |
| HDL cholesterol (mmol/L)                  | 1.29 (0.4)                | 1.14 (0.3)   | 1.59 (0.5)   | 1.30 (0.3)   |
| LDL cholesterol (mmol/L)                  | 3.3 (1.0)                 | 2.9 (1.0)    | 3.4 (1.1)    | 2.8 (0.9)    |
| TC/HDL ratio                              | 4.35 (1.3)                | 4.60 (1.3)   | 3.68 (1.1)   | 3.93 (1.1)   |
| SBP (mmHg)                                | 131.5 (16.3)              | 125.3 (16.1) | 131.6 (17.4) | 126.1 (17.4) |
| Diastolic blood pressure (mmHg)           | 80.5 (10.0)               | 79.1 (10.4)  | 78.8 (9.7)   | 77.4 (9.8)   |
| Hypertension <sup>†</sup> (%)             | 40                        | 34           | 44           | 39           |
| Type 2 diabetes <sup>§</sup> (%)          | 9                         | 24           | 9            | 29           |
| Former smokers (%)                        | 19                        | 6            | 16           | 1            |
| Current smokers (%)                       | 12                        | 9            | 10           | 1            |
| Family history of CVD <sup>§</sup> (%)    | 12                        | 8            | 15           | 10           |
| Antihypertensive treatment (%)            | 24                        | 26           | 30           | 32           |
| Lipid lowering treatment (%)              | 18                        | 27           | 18           | 27           |
| Follow-up time (years)                    | 2.94 (2.3)                | 2.93 (2.0)   | 2.92 (2.3)   | 2.83 (1.9)   |
|                                           | <i>Norwegian cohort</i>   |              |              |              |
|                                           | Men                       |              | Women        |              |
|                                           | Norwegian                 | South Asian  | Norwegian    | South Asian  |
| <i>N</i>                                  | 6 385                     | 1 239        | 8 015        | 967          |
| Age (years)                               | 43.7 (11.2)               | 41.4 (7.8)   | 43.9 (10.9)  | 40.3 (7.9)   |
| Age range                                 | 30.0 - 70.1               | 30.0 - 67.8  | 30.0 - 74.9  | 30.0 - 65.5  |
| TC (mmol/L)                               | 5.60 (1.1)                | 5.48 (1.0)   | 5.41 (1.0)   | 4.98 (0.9)   |
| HDL cholesterol (mmol/L)                  | 1.31 (0.3)                | 1.07 (0.2)   | 1.62 (0.4)   | 1.24 (0.3)   |
| TC/HDL ratio                              | 4.55 (1.4)                | 5.33 (1.4)   | 3.52 (1.1)   | 4.22 (1.2)   |
| SBP (mmHg)                                | 132.6 (14.4)              | 126.6 (13.2) | 124.0 (15.7) | 119.1 (15.6) |
| Diastolic blood pressure (mmHg)           | 77.6 (10.8)               | 76.9 (9.8)   | 71.5 (10.3)  | 70.0 (10.1)  |
| Hypertension <sup>†</sup> (%)             | 30                        | 22           | 19           | 16           |
| Diabetes (%)                              | 1.6                       | 8.6          | 1.4          | 10.9         |
| Former smokers (%)                        | 28                        | 16           | 26           | 2            |
| Current smokers (%)                       | 26                        | 25           | 31           | 1            |
| Family history of heart disease* (%)      | 33                        | 24           | 37           | 27           |
| Family history of stroke <sup>#</sup> (%) | 11                        | 3            | 13           | 4            |
| Antihypertensive treatment (%)            | 6                         | 8            | 6            | 9            |
| Lipid lowering treatment (%)              | 4                         | 6            | 3            | 6            |
| Follow-up time (years)                    | 8.44 (1.4)                | 7.65 (1.4)   | 8.54 (1.2)   | 7.88 (1.1)   |

Data are mean values (SD) for continuous variables and prevalence (%) for categorical variables. <sup>†</sup> Hypertension is defined as having systolic blood pressure  $\geq 140$  mmHg or diastolic blood pressure  $\geq 90$  mmHg or using blood pressure medication. HDL, high density lipoprotein; LDL, low density lipoprotein; SBP, systolic blood pressure, TC, total cholesterol. \*Parents or siblings have had heart attack or angina pectoris (self-report). <sup>#</sup>Parents or siblings have had stroke (self-report). <sup>§</sup>The diabetes variable in the New Zealand data includes people with diabetes of unknown type (5%) and type 2 diabetes (95%), while in the Norwegian data we could not differentiate between different types of diabetes. <sup>§</sup>Family history of CVD in the New Zealand data: self-reported familial history of ischemic heart disease or ischemic stroke occurring in a father or brother <55 years of age, or a mother or sister <65 years of age



1  
2  
3 South Asians had lower levels of TC and HDL and higher mean levels of TC/HDL ratios than  
4  
5 Europeans in both Norway and New Zealand. South Asians also had the lowest SBP levels  
6  
7 (Table 1). These differences persisted after adjustment for age ( $p < 0.05$  for differences  
8  
9 between ethnic groups – results not shown).  
10

11  
12  
13 The diabetes baseline prevalence was higher among South Asians compared to Europeans in  
14  
15 both cohorts (Table 1). The difference in diabetes were the same after adjustment for age  
16  
17 ( $p < 0.001$ ). Antihypertensive and lipid lowering treatments were generally more prevalent  
18  
19 among South Asians than Europeans, and more prevalent in the New Zealand cohort  
20  
21 compared to the Norwegian cohort. Cigarette smoking was more common among  
22  
23 Europeans than South Asians, and practically none of the South Asian women smoked.  
24  
25 Mean follow up time was significantly longer in the Norwegian cohort than in the New  
26  
27 Zealand cohort (Table 1).  
28  
29  
30  
31

### 32 **CVD events**

33  
34 During follow-up, we observed 2 654 CVD events among 129 446 individuals in the New  
35  
36 Zealand cohort (378 874 person-years) and 743 new CVD events among the 16 606  
37  
38 individuals in the Norwegian cohort (139 470 person-years). The overall crude rates were  
39  
40 700 per 100 000 person-years in the New Zealand cohort and 533 per 100 000 person-years  
41  
42 in the Norwegian cohort. Ethnic specific rates for men and women in the two cohorts are  
43  
44 shown in table 2 and in the Appendices (tables A1-A4). Also crude rates and age-adjusted  
45  
46 HRs of CVD by risk factors, ethnic groups, cohort and gender can be found in the Appendices.  
47  
48  
49  
50

### 51 **Prospective associations between risk factors and CVD**

52  
53 Increasing age was significantly associated with risk of CVD in both ethnic groups in both  
54  
55 cohorts (Table 2). The age effect was very similar within the countries for both ethnic groups  
56  
57  
58  
59  
60

1  
2  
3 and gender, but was stronger in the Norwegian cohort compared to the New Zealand  
4  
5 cohort. After adjustment for age, the traditional CVD risk factors were positively associated  
6  
7 with CVD in both ethnic groups, across gender and country. Whereas all the risk factor-CVD  
8  
9 event associations were statistically significant in Europeans, the 95% CIs were wider and the  
10  
11 results not always statistically significant among South Asians. The relationship between SBP,  
12  
13 TC/HDL ratio, smoking and subsequent CVD appeared to be weaker in Indian men compared  
14  
15 to European men in the New Zealand cohort. The prospective association between the risk  
16  
17 factors and CVD changed little after adjusting for the other risk factors in addition to age  
18  
19 (results not shown). In the sensitivity analyses where we either adjusted for medication use  
20  
21 or excluded people using BP- and lipid lowering medication at baseline, the estimates for the  
22  
23 prospective associations between risk factors and CVD were similar as in the main analyses.  
24  
25 However, for women in the New Zealand cohort, after excluding people on lipid-lowering  
26  
27 medication, the HR for TC/HDL ratio changed to 1.12; 95% CI 0.91-1.39 for Indian women  
28  
29 and to 1.20; 95% CI 1.12-1.27 for European women.  
30  
31  
32  
33  
34  
35  
36  
37  
38  
39  
40  
41  
42  
43  
44  
45  
46  
47  
48  
49  
50  
51  
52  
53  
54  
55  
56  
57  
58  
59  
60

Table 2. Age-adjusted hazard ratios for first CVD event after baseline for selected risk factors in men and women aged 30-74 years with no history of CVD, stratified by cohort, ethnicity and gender.

| MEN                       | N events/N <sup>‡</sup> | Crude rate/100 000 person-years (95% CI) | Age (one year)<br>HR (95%CI) | SBP (10 mm/Hg)<br>HR (95%CI) | DBP (10 mm/Hg)<br>HR (95%CI) | TC/HDL ratio (one unit)<br>HR (95%CI) | Diabetes (yes/no)<br>HR (95%CI) | Current smoking (yes/no)<br>HR (95%CI) |
|---------------------------|-------------------------|------------------------------------------|------------------------------|------------------------------|------------------------------|---------------------------------------|---------------------------------|----------------------------------------|
| <i>New Zealand cohort</i> |                         |                                          |                              |                              |                              |                                       |                                 |                                        |
| European men              | 1518/63316              | 815 (775-857)                            | 1.07 (1.06-1.07)             | 1.15 (1.12-1.18)             | 1.16 (1.10-1.22)             | 1.20 (1.16-1.23)                      | 1.92 (1.68-2.19)                | 2.29 (2.02-2.59)                       |
| Indian men                | 273/9997                | 933 (828-1050)                           | 1.06 (1.05-1.07)             | 1.05 (0.98-1.13)             | 1.02 (0.91-1.14)             | 1.08 (0.98-1.19)                      | 1.72 (1.34-2.20)                | 1.45 (0.99-2.11)                       |
| <i>Norwegian cohort</i>   |                         |                                          |                              |                              |                              |                                       |                                 |                                        |
| Norwegian men             | 379/6385                | 703 (636-778)                            | 1.10 (1.09-1.11)             | 1.15 (1.08-1.22)             | 1.19 (1.08-1.30)             | 1.22 (1.15-1.30)                      | 3.15 (2.14-4.65)                | 1.86 (1.51-2.29)                       |
| South Asian men           | 79/1239                 | 833 (668-1039)                           | 1.11 (1.08-1.14)             | 1.17 (1.01-1.35)             | 1.21 (0.97-1.51)             | 1.23 (1.05-1.42)                      | 1.61 (0.90-2.86)                | 1.43 (0.88-2.30)                       |
| WOMEN                     | N events/N <sup>‡</sup> | Crude rate/100 000 person-years (95% CI) | Age (one year)<br>HR (95%CI) | SBP(10 mm/Hg)<br>HR (95%CI)  | DBP (10 mm/Hg)<br>HR (95%CI) | TC/HDL ratio (one unit)<br>HR (95%CI) | Diabetes (yes/no)<br>HR (95%CI) | Current smoking (yes/no)<br>HR (95%CI) |
| <i>New Zealand cohort</i> |                         |                                          |                              |                              |                              |                                       |                                 |                                        |
| European women            | 757/49094               | 528 (492-567)                            | 1.06 (1.05-1.07)             | 1.09 (1.05-1.13)             | 1.13 (1.05-1.22)             | 1.14 (1.09-1.21)                      | 1.93 (1.59-2.35)                | 2.74 (2.30-3.27)                       |
| Indian women              | 106/7039                | 531 (439-643)                            | 1.06 (1.03-1.08)             | 1.27 (1.16-1.39)             | 1.25 (1.03-1.50)             | 1.21 (1.03-1.41)                      | 2.29 (1.55-3.37)                | 2.60 (0.64-10.59)                      |
| <i>Norwegian cohort</i>   |                         |                                          |                              |                              |                              |                                       |                                 |                                        |
| Norwegian women           | 259/8015                | 378 (335-427)                            | 1.10 (1.09-1.12)             | 1.20 (1.12-1.28)             | 1.32 (1.18-1.47)             | 1.30 (1.19-1.43)                      | 2.79 (1.52-5.11)                | 2.22 (1.73-2.84)                       |
| South Asian women         | 26/967                  | 341 (232-501)                            | 1.14 (1.09-1.19)             | 1.06 (0.86-1.30)             | 1.07 (0.74-1.55)             | 1.04 (0.77-1.39)                      | 2.74 (1.21-6.22)                | †                                      |

<sup>‡</sup>The numbers of events and people included in the analyses may differ due to missing risk factor data. Few were missing in the NZ cohort. <sup>†</sup> Not calculated due to no exposed cases.

DBP, diastolic blood pressure; HDL, high density lipoprotein; SBP, systolic blood pressure; TC, total cholesterol.

### Ethnic difference in CVD

South Asians of both genders in Norway and New Zealand had increased risk of CVD compared to the European majority populations (Table 3), with age-adjusted HRs ranging from 1.42-1.92. After adjustment for TC/HDL ratio and diabetes, the HRs for South Asians versus Europeans were reduced and no longer significant in women. Additional adjustments for SBP and smoking increased the hazard ratios again so that South Asians in both countries had significantly increased risk of CVD compared to Europeans. After adjustment for age, TC/HDL ratio, diabetes, SBP and smoking, the HRs for the excess risk in South Asians compared to Europeans varied from 1.39-1.76. The largest reduction in risk estimate after full adjustment was seen in South Asian men in the Norwegian cohort where the HR was lowered by approximately 38% after adjusting for the four major risk factors. The smallest

reduction in risk estimate after adjustment was among South Asian women in the New Zealand cohort where the risk estimate was only reduced by 7 % (from 1.42 – 1.39).

Table 3. Hazard ratios (95% CI) for first CVD event in South Asian groups compared to ethnic European groups in New Zealand and Norway.

|                                           | Men                    |                             | Women                     |                             |
|-------------------------------------------|------------------------|-----------------------------|---------------------------|-----------------------------|
|                                           | Indian vs. European NZ | South Asians vs. Norwegians | Indian NZ vs. European NZ | South Asians vs. Norwegians |
| <i>N events/N</i>                         | 1791/73308             | 436/7387                    | 863/56126                 | 264/8558                    |
| <i>Adjusted for</i>                       |                        |                             |                           |                             |
| Age                                       | 1.75 (1.53-2.00)       | 1.92 (1.48-2.49)            | 1.42 (1.16-1.75)          | 1.87 (1.21-2.87)            |
| Age, TC/HDL ratio                         | 1.77 (1.55-2.02)       | 1.66 (1.27-2.16)            | 1.41 (1.14-1.73)          | 1.52 (0.98-2.36)            |
| Age, TC/HDL ratio, diabetes               | 1.49 (1.30-1.71)       | 1.42 (1.08-1.87)            | 1.15 (0.92-1.42)          | 1.30 (0.82-2.04)            |
| Age, TC/HDL ratio, diabetes, SBP          | 1.57 (1.37-1.80)       | 1.53 (1.16-2.01)            | 1.19 (0.96-1.47)          | 1.31 (0.83-2.07)            |
| Age, TC/HDL ratio, diabetes, SBP, smoking | 1.64 (1.43-1.88)       | 1.57 (1.19-2.07)            | 1.39 (1.11-1.73)          | 1.76 (1.09-2.82)            |

HDL, high density lipoprotein; NZ, New Zealand; SBP, systolic blood pressure; TC, Total cholesterol.

All had complete information on the risk factors

Additional analyses showed that the excess risk in South Asians was particularly high for CHD. The full-adjusted HRs for CHD (corresponding to the analyses in the last row of Table 3) were 2.07; 95% CI 1.76-2.44 in South Asian men and 1.60; 95% CI 1.20-2.13 in South Asian women in New Zealand. In the Norwegian cohort, the full-adjusted HRs for CHD were 1.86; 95% CI 1.36-2.55 in South Asian men and 2.84; 95% CI 1.61-5.03 in South Asian women. In the sensitivity analyses for table 3 where we excluded people using BP- or lipid lowering medication at baseline, the patterns according to the risk factor adjustments remained the same as in the main analysis.

## DISCUSSION

This study confirmed that the traditional risk factors SBP, TC/HDL ratio, diabetes and smoking are all positively associated with risk of CVD in South Asians as well as in Europeans. The present study also confirmed that South Asians had an increased risk of CVD compared

1  
2  
3 to Europeans and that ethnic differences in the distribution of TC/HDL ratio and type 2  
4  
5 diabetes appear to explain some of this excess risk.  
6  
7

8  
9 The main strengths of this study are the prospective study design, and inclusion of data from  
10  
11 two countries. Unfortunately, we lacked information about duration of stay for the  
12  
13 immigrants and the ethnic groups that we studied are heterogeneous.  
14

15  
16 Strengths of the PREDICT cohort are the large sample size and the completeness of risk  
17  
18 factors included in the risk-assessment. Only 0.01% were missing on any of the four major  
19  
20 risk factors because they were part of the prediction algorithm and thereby compulsory to  
21  
22 fill in to the PREDICT template. Furthermore, comprehensive national health registers were  
23  
24 used to identify and exclude people with prior CVD and to determine cardiovascular  
25  
26 outcomes. In the New Zealand cohort, some recruitment bias is likely since risk assessment  
27  
28 was initially prioritized for high-risk patients. Indian patients are therefore over-represented  
29  
30 in the cohort together with Maoris and Pacifics[19]. The representativeness of the source  
31  
32 population is, however, improving as PREDICTs coverage increases. In this study, follow-up  
33  
34 extended to 2012 when PREDICT included 50% of guideline-eligible patients in the practices  
35  
36 where the PREDICT software is used[32]. We did not assume that the cohorts were  
37  
38 representative of the general populations in the two countries, but that the ethnic groups  
39  
40 within the two cohorts should be comparable. Adjusting for age was therefore particularly  
41  
42 important in the New Zealand cohort since South Asians were around seven years younger  
43  
44 than Europeans. Results from the two cohorts showed approximately the same regarding  
45  
46 ethnic differences, which is a strength concerning the external validity of these results. A  
47  
48 limitation in the New Zealand data is short follow-up time restricting the statistical power.  
49  
50  
51  
52  
53  
54  
55  
56  
57  
58  
59  
60

1  
2  
3 Another limitation is the lack of standardized BP measurements since recorded BP can easily  
4  
5 be affected by a range of factors including the type of device used[33].  
6  
7

8  
9 Strengths of CONOR data are the standardized measurements of risk factors, the linkage  
10  
11 with disease outcomes from comprehensive national health registers and the standardized  
12  
13 way of defining ethnicity using country of birth. A validation study examining the Oslo Health  
14  
15 study, showed that participants with a non-western background had a lower participation  
16  
17 rate than others[34]. This may reflect self-selection which can work both ways; healthy and  
18  
19 resourceful people have the energy and motivation to participate or less healthy people who  
20  
21 think their health could benefit from participating do so. Self-selection is unlikely to  
22  
23 influence associations between risk factors and subsequent disease, but could influence the  
24  
25 ethnic comparisons if the mechanisms were systematically different for the ethnic groups.  
26  
27

28  
29 The South Asian group in the Norwegian cohort was relatively small, which reduced the  
30  
31 precision of the estimates and limited the statistical power. Another limitation in the CONOR  
32  
33 data is missing information on some of the risk factors (see tables A1-A2 in the appendices  
34  
35 for numbers of missing). However, the extent of missing was small. The risk factor with most  
36  
37 missing in CONOR was diabetes (3% for the total cohort).  
38  
39

40  
41 In both cohorts, the endpoints are based on register data, including both hospital and  
42  
43 mortality data, which enables almost complete ascertainment of CVD events. In New  
44  
45 Zealand, more than 95% of patients with an acute CVD event are managed by government-  
46  
47 funded health services[19]. However, CVD events occurring among participants who  
48  
49 travelled outside of New Zealand, those who emigrated after the index CVD risk assessment  
50  
51 or among participants treated in private hospitals would not be captured in the national  
52  
53 hospital and mortality registers[19]. We have no information about possible emigration for  
54  
55  
56  
57  
58  
59  
60

1  
2  
3 the New Zealand cohort, but for the Norwegian cohort we know that few people have  
4  
5 emigrated (about 1% of the ethnic Norwegians and <3% of the South Asians who  
6  
7 participated in the Oslo health studies had emigrated by the end of follow-up). A limitation  
8  
9 for both cohorts is also the lack of medication data during follow-up. However, adjustment  
10  
11 for baseline medication did not change the estimates (results not shown), and Table 1 shows  
12  
13 that South Asians used more antihypertensives and lipid lowering drugs at baseline than  
14  
15 Europeans. Both countries have universal health care and South Asians should have the  
16  
17 same access to cardiovascular medication as Europeans. It is therefore not likely that lack of  
18  
19 treatment explains the differences in risk of CVD between the two ethnic groups.  
20  
21  
22  
23

24  
25 Our finding that the traditional major CVD risk factors contribute to the development of CVD  
26  
27 in South Asians as in Europeans was an expected, yet important, finding since most  
28  
29 knowledge about CVD prevention is based on studies in populations of European descent,  
30  
31 and some have questioned whether these risk factors apply worldwide[11, 35]. This finding  
32  
33 is in line with the large INTERHEART and INTERSTROKE case-control studies[11, 12], which  
34  
35 reported that 90% of the population attributable risk for AMI and stroke worldwide was  
36  
37 accounted for by respectively nine and ten (similar) risk factors, including those included in  
38  
39 the present study. We are only aware of two other prospective studies reporting HRs for the  
40  
41 prospective relationship between major CVD risk factors and subsequent CVD in South  
42  
43 Asians[7, 36]. One of these studies included only men,[7] and the other showed estimates  
44  
45 for men and women combined and did not include blood lipids[36]. These studies generally  
46  
47 agree with our findings that traditional risk factors contribute to the development of CVD in  
48  
49 South Asians as in Europeans[7, 36]. Also, consistent with previous reports[5, 6], we found  
50  
51 that South Asians in both Norway and New Zealand have a higher risk of CVD compared to  
52  
53 the European majority populations. By including all the measured risk factors (BP, TC/HDL  
54  
55  
56  
57  
58  
59  
60

1  
2  
3 ratio, diabetes and smoking) as adjustment variables in one statistical model, we could not  
4  
5 explain the higher risk of CVD in South Asians. However, the increased risk was attenuated  
6  
7 when we only included the risk factors more prevalent in South Asians than in Europeans  
8  
9 (TC/HDL ratio and diabetes).  
10

11  
12  
13 The excess risk of CVD among South Asians compared to Europeans in the Norwegian cohort  
14  
15 was almost two-fold. This is comparable to what we reported previously when studying the  
16  
17 total Norwegian population[5]. The South Asians in the New Zealand cohort had 42-75%  
18  
19 higher risk of CVD compared to European New Zealanders which also agrees with previous  
20  
21 New Zealand studies [6]. In both the Norwegian and New Zealand data, South Asians had  
22  
23 higher baseline levels of dyslipidemia indicated by the TC/HDL ratio and higher diabetes  
24  
25 prevalence compared to the European majority populations, which is in general agreement  
26  
27 with previous knowledge from these countries[14-16]. Attenuation of the excess risk in  
28  
29 South Asians versus Europeans was best achieved in the Cox model only including diabetes  
30  
31 and TC/HDL ratio as covariates in addition to age. The same was found in both cohorts,  
32  
33 clearly indicating that the unfavorable distribution of blood lipids and type 2 diabetes  
34  
35 explains some of the higher risk of CVD in South Asians. South Asians generally have a high  
36  
37 prevalence of metabolic risk factors related to insulin resistance, often clustered so that they  
38  
39 match the concept of the metabolic syndrome[37-40]. A British cohort study that tested  
40  
41 whether traditional risk factors could account for the high mortality of CHD among South  
42  
43 Asian men compared to European men, reported that adjusting for insulin resistance,  
44  
45 dyslipidemia and hyperglycemia in South Asians did not explain their higher risk[7].  
46  
47 However, they also adjusted for smoking and total cholesterol, which were both less  
48  
49 prevalent/lower among South Asian men compared to European men.  
50  
51  
52  
53  
54  
55  
56  
57  
58  
59  
60



1  
2  
3 It is unclear why the traditional risk factors do not completely explain the excess risk of CVD  
4  
5 in South Asians. This could be related to incomplete adjustments; due to either imprecise  
6  
7 measurement of risk factors or that other important risk factors were not included (e.g.  
8  
9 waist measurement, length of time since diabetes diagnosis). A number of non-conventional  
10  
11 risk factors are also thought to partially account for the high risk of CVD in South Asians,  
12  
13 including dysfunctional HDL, C-Reactive Protein, thrombogenic risk factors, telomere length,  
14  
15 high homocysteine levels and low birth weight[41, 42]. Socioeconomic factors could  
16  
17 probably also explain some of the differences in risk between the ethnic groups, but we did  
18  
19 not have such variables. Another possibility is that risk factors work cumulatively over time  
20  
21 in the development of atherosclerosis, and some risk factors may also work at specific and  
22  
23 crucial time points during the life course. Measurements taken on single occasions may also  
24  
25 lead to an underestimation of the strength between the *usual* levels of the risk factors and  
26  
27 later disease, known as the regression dilution bias[43]. Consequently, it is unlikely that the  
28  
29 ethnic differences would disappear completely by adjusting for selected risk factors  
30  
31 measured once in midlife.  
32  
33  
34  
35  
36  
37  
38

39 Although South Asians seem to have an underlying susceptibility for metabolic diseases,  
40  
41 traditional and modifiable risk factors are important for preventing disease. Our analyses  
42  
43 indicate that it is important to focus on the prevention of type 2 diabetes and dyslipidaemia  
44  
45 when aiming to reduce the burden of CVD among South Asians. The additional effect of  
46  
47 abdominal obesity for the risk of CVD among South Asians in Norway and New Zealand has,  
48  
49 however, not yet been studied although we know that the prevalence is high in this ethnic  
50  
51 group[38, 44]. In both Norway[45, 46] and New Zealand,[47] intervention studies targeting  
52  
53 immigrants from South Asia have been carried out with some promising results. A UK-study  
54  
55 that prospectively examined the influence from four health behaviors on the risk of CVD in  
56  
57  
58  
59  
60

1  
2  
3 South Asian immigrants and UK Europeans found an important potential for disease  
4  
5 prevention among South Asians if they adhered to healthy behaviors[8].  
6  
7  
8  
9

## 10 **CONCLUSION**

11  
12 Ethnic differences in distribution of TC/HDL ratio and type 2 diabetes explained some, but  
13 not all, the excess risk of CVD in South Asians compared to Europeans in Norway and New  
14 Zealand. Smoking and elevated BP were less prevalent among South Asians and thus could  
15 not explain any of the observed differences in risk of CVD. Targeted diabetes and  
16  
17 dyslipidaemia management among South Asians, including support for healthy lifestyle  
18  
19 choices, should be a priority if the high burden of CVD in these ethnic populations is to be  
20  
21 reduced.  
22  
23  
24  
25  
26  
27  
28  
29  
30  
31  
32

## 33 **Acknowledgements**

34  
35 The authors thank Tomislav Dimoski at the Norwegian Knowledge Centre for Health Services,  
36 Oslo, Norway for his contribution by developing software necessary for obtaining data from  
37 Norwegian hospitals, conducting the data collection and quality assurance of data in this  
38 project. We also wish to thank Dr. Geeta Gala and Dr Roshini Peiris-John, members of the  
39 South Asian governance group for the University of Auckland VIEW research team, for  
40 reviewing the paper and giving us their feedback.  
41  
42  
43  
44  
45  
46  
47  
48  
49

50 **Competing interests:** All authors have completed the ICMJE uniform disclosure form at  
51 [www.icmje.org/coi\\_disclosure.pdf](http://www.icmje.org/coi_disclosure.pdf). Dr. Jackson and Dr. Mehta both report grants from  
52 Health Research Council of New Zealand. All other co-authors declare to have no competing  
53  
54  
55  
56  
57  
58  
59  
60  
61  
62  
63  
64  
65  
66  
67  
68  
69  
70  
71  
72  
73  
74  
75  
76  
77  
78  
79  
80  
81  
82  
83  
84  
85  
86  
87  
88  
89  
90  
91  
92  
93  
94  
95  
96  
97  
98  
99  
100  
101  
102  
103  
104  
105  
106  
107  
108  
109  
110  
111  
112  
113  
114  
115  
116  
117  
118  
119  
120  
121  
122  
123  
124  
125  
126  
127  
128  
129  
130  
131  
132  
133  
134  
135  
136  
137  
138  
139  
140  
141  
142  
143  
144  
145  
146  
147  
148  
149  
150  
151  
152  
153  
154  
155  
156  
157  
158  
159  
160  
161  
162  
163  
164  
165  
166  
167  
168  
169  
170  
171  
172  
173  
174  
175  
176  
177  
178  
179  
180  
181  
182  
183  
184  
185  
186  
187  
188  
189  
190  
191  
192  
193  
194  
195  
196  
197  
198  
199  
200  
201  
202  
203  
204  
205  
206  
207  
208  
209  
210  
211  
212  
213  
214  
215  
216  
217  
218  
219  
220  
221  
222  
223  
224  
225  
226  
227  
228  
229  
230  
231  
232  
233  
234  
235  
236  
237  
238  
239  
240  
241  
242  
243  
244  
245  
246  
247  
248  
249  
250  
251  
252  
253  
254  
255  
256  
257  
258  
259  
260  
261  
262  
263  
264  
265  
266  
267  
268  
269  
270  
271  
272  
273  
274  
275  
276  
277  
278  
279  
280  
281  
282  
283  
284  
285  
286  
287  
288  
289  
290  
291  
292  
293  
294  
295  
296  
297  
298  
299  
300  
301  
302  
303  
304  
305  
306  
307  
308  
309  
310  
311  
312  
313  
314  
315  
316  
317  
318  
319  
320  
321  
322  
323  
324  
325  
326  
327  
328  
329  
330  
331  
332  
333  
334  
335  
336  
337  
338  
339  
340  
341  
342  
343  
344  
345  
346  
347  
348  
349  
350  
351  
352  
353  
354  
355  
356  
357  
358  
359  
360  
361  
362  
363  
364  
365  
366  
367  
368  
369  
370  
371  
372  
373  
374  
375  
376  
377  
378  
379  
380  
381  
382  
383  
384  
385  
386  
387  
388  
389  
390  
391  
392  
393  
394  
395  
396  
397  
398  
399  
400  
401  
402  
403  
404  
405  
406  
407  
408  
409  
410  
411  
412  
413  
414  
415  
416  
417  
418  
419  
420  
421  
422  
423  
424  
425  
426  
427  
428  
429  
430  
431  
432  
433  
434  
435  
436  
437  
438  
439  
440  
441  
442  
443  
444  
445  
446  
447  
448  
449  
450  
451  
452  
453  
454  
455  
456  
457  
458  
459  
460  
461  
462  
463  
464  
465  
466  
467  
468  
469  
470  
471  
472  
473  
474  
475  
476  
477  
478  
479  
480  
481  
482  
483  
484  
485  
486  
487  
488  
489  
490  
491  
492  
493  
494  
495  
496  
497  
498  
499  
500  
501  
502  
503  
504  
505  
506  
507  
508  
509  
510  
511  
512  
513  
514  
515  
516  
517  
518  
519  
520  
521  
522  
523  
524  
525  
526  
527  
528  
529  
530  
531  
532  
533  
534  
535  
536  
537  
538  
539  
540  
541  
542  
543  
544  
545  
546  
547  
548  
549  
550  
551  
552  
553  
554  
555  
556  
557  
558  
559  
560  
561  
562  
563  
564  
565  
566  
567  
568  
569  
570  
571  
572  
573  
574  
575  
576  
577  
578  
579  
580  
581  
582  
583  
584  
585  
586  
587  
588  
589  
590  
591  
592  
593  
594  
595  
596  
597  
598  
599  
600  
601  
602  
603  
604  
605  
606  
607  
608  
609  
610  
611  
612  
613  
614  
615  
616  
617  
618  
619  
620  
621  
622  
623  
624  
625  
626  
627  
628  
629  
630  
631  
632  
633  
634  
635  
636  
637  
638  
639  
640  
641  
642  
643  
644  
645  
646  
647  
648  
649  
650  
651  
652  
653  
654  
655  
656  
657  
658  
659  
660  
661  
662  
663  
664  
665  
666  
667  
668  
669  
670  
671  
672  
673  
674  
675  
676  
677  
678  
679  
680  
681  
682  
683  
684  
685  
686  
687  
688  
689  
690  
691  
692  
693  
694  
695  
696  
697  
698  
699  
700  
701  
702  
703  
704  
705  
706  
707  
708  
709  
710  
711  
712  
713  
714  
715  
716  
717  
718  
719  
720  
721  
722  
723  
724  
725  
726  
727  
728  
729  
730  
731  
732  
733  
734  
735  
736  
737  
738  
739  
740  
741  
742  
743  
744  
745  
746  
747  
748  
749  
750  
751  
752  
753  
754  
755  
756  
757  
758  
759  
760  
761  
762  
763  
764  
765  
766  
767  
768  
769  
770  
771  
772  
773  
774  
775  
776  
777  
778  
779  
780  
781  
782  
783  
784  
785  
786  
787  
788  
789  
790  
791  
792  
793  
794  
795  
796  
797  
798  
799  
800  
801  
802  
803  
804  
805  
806  
807  
808  
809  
810  
811  
812  
813  
814  
815  
816  
817  
818  
819  
820  
821  
822  
823  
824  
825  
826  
827  
828  
829  
830  
831  
832  
833  
834  
835  
836  
837  
838  
839  
840  
841  
842  
843  
844  
845  
846  
847  
848  
849  
850  
851  
852  
853  
854  
855  
856  
857  
858  
859  
860  
861  
862  
863  
864  
865  
866  
867  
868  
869  
870  
871  
872  
873  
874  
875  
876  
877  
878  
879  
880  
881  
882  
883  
884  
885  
886  
887  
888  
889  
890  
891  
892  
893  
894  
895  
896  
897  
898  
899  
900  
901  
902  
903  
904  
905  
906  
907  
908  
909  
910  
911  
912  
913  
914  
915  
916  
917  
918  
919  
920  
921  
922  
923  
924  
925  
926  
927  
928  
929  
930  
931  
932  
933  
934  
935  
936  
937  
938  
939  
940  
941  
942  
943  
944  
945  
946  
947  
948  
949  
950  
951  
952  
953  
954  
955  
956  
957  
958  
959  
960  
961  
962  
963  
964  
965  
966  
967  
968  
969  
970  
971  
972  
973  
974  
975  
976  
977  
978  
979  
980  
981  
982  
983  
984  
985  
986  
987  
988  
989  
990  
991  
992  
993  
994  
995  
996  
997  
998  
999  
1000

1  
2  
3 **Funding:** This work was supported by the Norwegian Extra-Foundation for Health and  
4  
5 Rehabilitation (grant number 2012-2-0129).  
6  
7

8 **Contributors:** HEM, RJ and GST contributed to the conception and design of the work. RJ, BK,  
9  
10 AKJ and GST contributed to the collection of data. JI, RP and SM contributed to data  
11  
12 preparations and definition of endpoints. KRS drafted the paper and carried out the data  
13  
14 analyses. All authors contributed to the interpretation of data as well as critical reading and  
15  
16 revision of the draft.  
17  
18  
19

20  
21 **Data sharing statement:** No additional data are available.  
22  
23  
24  
25  
26  
27  
28  
29  
30  
31  
32  
33  
34  
35  
36  
37  
38  
39  
40  
41  
42  
43  
44  
45  
46  
47  
48  
49  
50  
51  
52  
53  
54  
55  
56  
57  
58  
59  
60

## REFERENCES

1. Zaman MJ, Bhopal RS. New answers to three questions on the epidemic of coronary mortality in south Asians: incidence or case fatality? Biology or environment? Will the next generation be affected? *Heart* 2013;99(3):154-8.
2. Bo A, Zinckernagel L, Krasnik A et al. Coronary heart disease incidence among non-Western immigrants compared to Danish-born people: effect of country of birth, migrant status, and income. *Eur J Prev Cardiol* 2015;22(10):1281-9
3. Hedlund E, Lange A, Hammar N. Acute myocardial infarction incidence in immigrants to Sweden. Country of birth, time since immigration, and time trends over 20 years. *Eur J Epidemiol* 2007;22(8):493-503.
4. Tillin T, Hughes AD, Mayet J, et al. The Relationship Between Metabolic Risk Factors and Incident Cardiovascular Disease in Europeans, South Asians, and African Caribbeans: SABRE (Southall and Brent Revisited)—A Prospective Population-Based Study. *J Am Coll Cardiol*. 2013;61(17):1777-1786.
5. Rabanal KS, Selmer RM, Iglund J et al. Ethnic inequalities in acute myocardial infarction and stroke rates in Norway 1994-2009: a nationwide cohort study (CVDNOR). *BMC Public Health* 2015;15:1073.
6. Ministry of Health, *Asian Health Chart Book 2006*. 2006: Wellington: Ministry of Health
7. Forouhi N, Sattar N, Tillin T et al. Do known risk factors explain the higher coronary heart disease mortality in South Asian compared with European men? Prospective follow-up of the Southall and Brent studies, UK. *Diabetologia*, 2006;49(11):2580-2588.
8. Eriksen A, Tillin T, O'Connor L et al. The impact of health behaviours on incident cardiovascular disease in Europeans and South Asians—a prospective analysis in the UK SABRE study. *PLoS one*, 2015;1:15.
9. de Munter JS, Agyemang C, Stronks K et al, Association of physical activity, smoking, and alcohol intake with CVD-related hospital discharge in people of European, South Asian, or African descent. *Eur J Prev Cardiol* 2013;20(1):80-8.
10. Ranganathan M and Bhopal R. Exclusion and inclusion of nonwhite ethnic minority groups in 72 North American and European cardiovascular cohort studies. *PLoS medicine*, 2006;3(3):e44.
11. Yusuf S, Hawken S, Ounpuu S et al. Effect of potentially modifiable risk factors associated with myocardial infarction in 52 countries (the INTERHEART study): case-control study. *Lancet* 2004;364(9438):937-52.
12. O'Donnell MJ, Xavier D, Liu L et al. Risk factors for ischaemic and intracerebral haemorrhagic stroke in 22 countries (the INTERSTROKE study): a case-control study. *Lancet* 2010;376(9735):112-23.
13. Joshi P, Islam S, Pais P et al, Risk factors for early myocardial infarction in South Asians compared with individuals in other countries. *Jama* 2007;297(3):286-94
14. Perumal L, Wells S, Ameratunga S et al. Markedly different clustering of CVD risk factors in New Zealand Indian and European people but similar risk scores (PREDICT-14). *Aust N Z J Public Health* 2012;36(2):141-4.
15. Jenum A, Diep LM, Holmboe-Ottesen G et al. Diabetes susceptibility in ethnic minority groups from Turkey, Vietnam, Sri Lanka and Pakistan compared with Norwegians - the association with adiposity is strongest for ethnic minority women. *BMC Public Health* 2012;12(1):150.
16. Rabanal KS, Lindman AS, Selmer RM et al. Ethnic differences in risk factors and total risk of cardiovascular disease based on the Norwegian CONOR study. *Eur J Prev Cardiol* 2013;20(6):1013-1021.
17. Kumar B, Selmer R, Lindman AS et al. Ethnic differences in SCORE cardiovascular risk in Oslo, Norway. *Eur J Cardiovasc Prev Rehabil* 2009;16:229 - 234.

- 1
  - 2
  - 3
  - 4
  - 5
  - 6
  - 7
  - 8
  - 9
  - 10
  - 11
  - 12
  - 13
  - 14
  - 15
  - 16
  - 17
  - 18
  - 19
  - 20
  - 21
  - 22
  - 23
  - 24
  - 25
  - 26
  - 27
  - 28
  - 29
  - 30
  - 31
  - 32
  - 33
  - 34
  - 35
  - 36
  - 37
  - 38
  - 39
  - 40
  - 41
  - 42
  - 43
  - 44
  - 45
  - 46
  - 47
  - 48
  - 49
  - 50
  - 51
  - 52
  - 53
  - 54
  - 55
  - 56
  - 57
  - 58
  - 59
  - 60
18. Bannink L, Wells S, Broad J et al. Web-based assessment of cardiovascular disease risk in routine primary care practice in New Zealand: the first 18,000 patients (PREDICT CVD-1). *N Z Med J* 2006; 119(1245):U2313.
19. Wells S, Riddell T, Kerr A et al. Cohort Profile: The PREDICT Cardiovascular Disease Cohort in New Zealand Primary Care (PREDICT-CVD 19). *Int J Epidemiol* 2015:dyv312.
20. Statistics New Zealand. Subnational population estimates tables. Wellington: Statistics New Zealand. 2014.
21. New Zealand Guideline Group. The assessment and Management of Cardiovascular Risk. 2003: Wellington, New Zealand
22. Anderson KM, Odell PM, Wilson PW et al. Cardiovascular disease risk profiles. *Am Heart J* 1991;121(1):293-298.
23. Næss Ø, Sjøgaard AJ, Arnese et al. Cohort Profile: Cohort of Norway (CONOR). *Int J Epidemiol* 2008; 37(3):481-485.
24. Sulo G, Igland J, Vollset SE et al. Cardiovascular disease and diabetes mellitus in Norway during 1994-2009 CVDNOR - a nationwide research project. *Norsk epidemiologi* 2013;23(1).
25. Sulo G, Igland J, Nygård O et al. Favourable trends in incidence of AMI in Norway during 2001-2009 do not include younger adults: a CVDNOR project. *Eur J Prev Cardiol* 2014;21.11:1358-64.
26. Ministry of Health. ICD-10-AM/ACHI/ACS. Wellington: Ministry of Health. September 25 2015]; Available from: <http://www.health.govt.nz/nz-health-statistics/classification-and-terminology/icd-10-am-achi-acs>.
27. Statistics New Zealand. Tatauranga Aotearoa. 2013 Census. Ethnic group profile: Indian. Retrived 11.09.2015 from: [http://www.stats.govt.nz/Census/2013-census/profile-and-summary-reports/ethnic-profiles.aspx?request\\_value=24743&parent\\_id=24726&tabname=#2013](http://www.stats.govt.nz/Census/2013-census/profile-and-summary-reports/ethnic-profiles.aspx?request_value=24743&parent_id=24726&tabname=#2013).
28. Norwegian Institute of Public Health. Documentation of the CONOR file. Version 02.07.2012. 14.12.2016]; Available from: <https://www.fhi.no/globalassets/migrering/dokumenter/pdf/documentation-of-the-conor-file.pdf>
29. Kumar B, Grøtvedt L, Meyer H et al. The Oslo immigrant health profile, in Rapport 2008:7. Oslo: Norwegian Institute of Public Health 2008.
30. Schoenfeld D. Partial residuals for the proportional hazards regression model. *Biometrika*. 1982;69(1)239-41.
31. Sogaard A. Cohort Norway (CONOR): Materials and methods: Norwegian Institute of Public Health; 2007. Available from: <http://www.fhi.no/studier/cohort-of-norway>.
32. Ministry of Health. How is my PHO performing? 2014/15 Quarter 3 (January to March) results. Wellington: Ministry of Health 2015 [February 5 2015]. Available from: <http://www.health.govt.nz/new-zealand-health-system/health-targets/how-my-pho-performing>.
33. Tolonen H, Koponen P, Naska A et al. Challenges in standardization of blood pressure measurement at the population level. *BMC Med Res Methodol* 2015;15:33.
34. Sogaard A, Selmer R, Bjertness E et al. The Oslo Health Study: The impact of self-selection in a large population-based survey. *Int J Equity Health*. 2004;3(3):1-12.
35. Pais P, Pogue J, Gerstein H et al. Risk factors for acute myocardial infarction in Indians: a case-control study. *Lancet*. 1996;348(9024):358-63.
36. Williams ED, Stamatakis E, Chandola T et al. Physical activity behaviour and coronary heart disease mortality among South Asian people in the UK: an observational longitudinal study. *Heart*. 2011;97(8):655-9.
37. Alberti KG, Eckel RH, Grundy SM, Zimmet PZ, Cleeman JI, Donato KA, et al. Harmonizing the metabolic syndrome: a joint interim statement of the International Diabetes Federation Task Force on Epidemiology and Prevention; National Heart, Lung, and Blood Institute; American

- 1  
2  
3 Heart Association; World Heart Federation; International Atherosclerosis Society; and  
4 International Association for the Study of Obesity. *Circulation*. 2009;120(16):1640-5.  
5 38. Misra A and Khurana L. The metabolic syndrome in South Asians: epidemiology,  
6 determinants, and prevention. *Metab Syndr Relat Disord* 2009;7(6):497-514.  
7 39. McKeigue P, Shah B, Marmot M. Relation of central obesity and insulin resistance with high  
8 diabetes prevalence and cardiovascular risk in South Asians. *Lancet*. 1991;337(8738):382-6..  
9 40. Hjellset VT, Bjorge B, Eriksen HR et al, Risk factors for type 2 diabetes among female Pakistani  
10 immigrants: the InvaDiab-DEPLAN study on Pakistani immigrant women living in Oslo,  
11 Norway. *J Immigr Minor Health*, 2011;13(1):101-10.  
12 41. Ahmed E, El-Menyar A. South Asian Ethnicity and Cardiovascular Risk The Known, the  
13 Unknown, and the Paradox. *Angiology* 2015;66(5):405-15.  
14 42. Nair M, Prabhakaran D. Why Do South Asians Have High Risk for CAD? *Glob Heart*.  
15 2012;7(4):307-14.  
16 43. MacMahon S, Peto R, Cutler J et al. Blood pressure, stroke, and coronary heart disease. Part  
17 1, Prolonged differences in blood pressure: prospective observational studies corrected for  
18 the regression dilution bias. *Lancet*. 1990;335(8692):765-74.  
19 44. Kumar B, Meyer H, Wandel M et al. Ethnic differences in obesity among immigrants from  
20 developing countries, in Oslo, Norway. *Int J Obes*. 2006;30:684-90.  
21 45. Telle-Hjellset V, Raberg Kjollesdal MK, Bjorge B et al. The InnvaDiab-DE-PLAN study: a  
22 randomised controlled trial with a culturally adapted education programme improved the  
23 risk profile for type 2 diabetes in Pakistani immigrant women. *Br J Nutr*. 2013;109(3):529-38.  
24 46. Andersen E, Hostmark AT, Holme I, Anderssen SA. Intervention effects on physical activity  
25 and insulin levels in men of Pakistani origin living in Oslo: a randomised controlled trial. *J*  
26 *Immigr Minor Health*. 2013;15(1):101-10.  
27 47. Rush EC, Chandu V, Plank LD. Reduction of abdominal fat and chronic disease factors by  
28 lifestyle change in migrant Asian Indians older than 50 years. *Asia Pac J Clin Nutr*. 2007;  
29 16(4):671-676.  
30  
31  
32  
33  
34  
35  
36  
37  
38  
39  
40  
41  
42  
43  
44  
45  
46  
47  
48  
49  
50  
51  
52  
53  
54  
55  
56  
57  
58  
59  
60

## **VIEW Ethnicity Protocol**

Ethnicity is assigned to an individual based on a prioritisation output. The prioritisation ethnicity protocol adopted by VIEW is based on the Statistics New Zealand ethnicity prioritisation method, and is the most frequently used output method in Ministry of Health statistics. The table below shows level 2 ethnicity codes and their corresponding priority. More information on prioritised output can be found in Appendix A

Table 1

### **Level 2 ethnic codes**

| <b>Ethnic Group code</b> | <b>Ethnic Group code description</b> | <b>Ethnic Group priority</b> | <b>Revised VIEW priority</b> |
|--------------------------|--------------------------------------|------------------------------|------------------------------|
| 10                       | European not further defined         | 21                           |                              |
| 11                       | NZ European                          | 22                           |                              |
| 12                       | Other European                       | 20                           |                              |
| 21                       | NZ Maori                             | 1                            |                              |
| 30                       | Pacific Island not further defined   | 9                            |                              |
| 31                       | Samoan                               | 7                            |                              |
| 32                       | Cook Island Maori                    | 6                            |                              |
| 33                       | Tongan                               | 5                            |                              |
| 34                       | Niuean                               | 4                            |                              |
| 35                       | Tokelauan                            | 2                            |                              |
| 36                       | Fijian                               | 3                            |                              |
| 37                       | Other Pacific Island                 | 8                            |                              |
| 40                       | Asian not further defined            | 14                           |                              |
| 41                       | Southeast Asian                      | 10                           | <b>12</b>                    |
| 42                       | Chinese                              | 12                           | <b>11</b>                    |
| 43                       | Indian                               | 11                           | <b>10</b>                    |
| 44                       | Other Asian                          | 13                           |                              |
| 51                       | Middle Eastern                       | 17                           |                              |
| 52                       | Latin American / Hispanic            | 15                           |                              |
| 53                       | African                              | 16                           |                              |
| 54                       | Other (retired on 1/07/2009)         | 19                           |                              |
| 61                       | Other ethnicity                      | 18                           |                              |
| 94                       | Don't know                           | 94                           |                              |
| 95                       | Refused to answer                    | 95                           |                              |
| 97                       | Response unidentifiable              | 97                           |                              |
| 99                       | Not stated                           | 99                           |                              |

**PREDICT 2015 baseline data – Unique ethnicity codes**

Ethnicity data used in VIEW comes from two sources – PREDICT and Ministry of Health. When patients are enrolled into PREDICT, their ethnicity are recorded across three ethnicity inputs fields (allowing for the self-identification of up to 3 ethnicity responses). In addition, the Ministry of Health has provided us with a 2015 update of the NHI Demographic Lookup table, containing the demographic data for 7.7 million unique eNHI. Similarly, up to three ethnicity codes are provided (allowing for the self-identification of up to three ethnicity responses). In total, each patient has up to 6 codes that represent their ethnicity.

All unique responses provided from each of the ethnicity fields in the PREDICT 2015 Baseline Data

| Source                  | Variable name     | Ethnicity Codes                                                                                                       |
|-------------------------|-------------------|-----------------------------------------------------------------------------------------------------------------------|
| PREDICT 2015            | pt_ethnic_group_1 | 10 11 12 21 30 31 32 33 34 35 36 37<br>40 41 42 43 44 51 52 53 54 441 442<br>443 444 44411 44412 44413 44414 44415 NA |
|                         | pt_ethnic_group_2 | 10 11 12 21 30 31 32 33 34 35 36 37<br>40 41 42 43 44 51 52 53 54 99 441<br>443 44411 44412 44414 NA                  |
|                         | pt_ethnic_group_3 | 10 11 12 21 30 31 32 33 34 35 36 37<br>40 41 42 43 44 51 52 53 54 99 441<br>44411 44414 NA                            |
| Ministry of Health 2015 | nhi_ethnicg1      | 10 11 12 21 30 31 32 33 34 35 36 37 40<br>41 42 43 44 51 52 53 54 61 94 95 97 99                                      |
|                         | nhi_ethnicg2      | 10 11 12 21 30 31 32 33 34 35 36 37 40<br>41 42 43 44 51 52 53 54 61 94 95 97 99<br>NA                                |
|                         | nhi_ethnicg3      | 10 11 12 21 30 31 32 33 34 35 36 37 40<br>41 42 43 44 51 52 53 61 97 99 NA                                            |

NB: There are no NAs in “nhi\_ethnicg1”



### Procedure for Ethnicity Allocation

The procedure assigns one single ethnicity to each individual. The ethnicity response (there are 6 in total) of each individual is read by the programme using the prioritisation protocol. The programme checks each of the 6 ethnicity fields of a person, and determines which single ethnicity will be assigned. The programme checks each row of data and executes the following command in this order:

- 1) Is this person Maori? If yes, write "NZMaori", otherwise next question.
- 2) Is this person Pacific? If yes, write "Pacific", otherwise next question.
- 3) Is this person Indian? If yes, write "Indian", otherwise next question.
- 4) Is this person Chinese? If yes, write "Chinese", otherwise next question.
- 5) Is this person Asian? If yes, write "Asian", otherwise next question.
- 6) Is this person MELAA? If yes, write "MELAA", otherwise next question.
- 7) Is this person Other? If yes, write "Other", otherwise next question.
- 8) Is this person European? If yes, write "European", otherwise next question.
- 9) Is the ethnicity unknown, not answered, not identifiable? If yes, write "No\_not\_stated".

NB: MELAA = Middle Eastern, Latin American, African

### **VIEW REVISED** Procedure for Ethnicity Allocation

- 1) Is this person Maori? If yes, write "NZMaori", otherwise next question.
- 2) Is this person Pacific? If yes, write "Pacific", otherwise next question.
- 3) Is this person Indian? If yes, write "Indian", otherwise next question.
- 4) Is this person Chinese? If yes, write "Chinese", otherwise next question.
- 5) Is this person Asian? If yes, write "Asian", otherwise next question.
- 6) Is this person European? If yes, write "European", otherwise next question.
- 7) Is this person MELAA? If yes, write "MELAA", otherwise next question.
- 8) Is this person Other? If yes, write "Other", otherwise next question.
- 9) Is the ethnicity unknown, not answered, not identifiable? If yes, write "No\_not\_stated".

## Multiple Ethnicities

Any individuals with multiple ethnicity responses will be assigned the higher priority of ethnicity.

Example 1 – If a patient is recorded as Maori (21) and Samoan (31), then they are recorded as “Maori”. This is because the programme asks whether this person is “Maori” first. With the answer being yes, “Maori” is recorded. The programme then moves onto the next person instead of asking whether or not they are Pacific.

Example 2 – If a person is recorded as Chinese (42), Southeast Asian (41), and NZ European (11), then they are recorded as Chinese. With Chinese being the highest priority, the person is assigned “Chinese” and the programme moves onto the next person.

NB: “Asian” contains Southeast Asian (41) which has a higher priority compared to Indian and Chinese (see Table 1). However, due to its relatively small population, the Southeast Asian group will be included in the “Asian” group, and thus not prioritised over Indian or Chinese. This is the ONLY exception to the prioritisation order!

## The use of “OTHER” Ethnicity

This classification should be clearly defined. The term “Other” does in fact have its own ethnicity coding. It should not be used as a category for which miscellaneous or small populations are assigned as a matter of convenience. Previously, Middle Eastern (51), Latin American/Hispanic (52), and African (53), were frequently included in the OTHER ethnic group. Since 2009 (I think), Statistics New Zealand and the MOH have adopted a new category called MELAA which incorporates codes 51-53. A distinction between MELAA and Other is therefore created. There are two codes (and there should only be two codes), for Other Ethnicity – 54 (pre-2009) and 61 (post-2009).

### Original “ag\_eth” Classification

| Label    | Code                                                    |
|----------|---------------------------------------------------------|
| Maori    | 21                                                      |
| Pacific  | 30, 31, 32, 33, 34, 35, 36, 37                          |
| Indian   | 43, (36 & 43)                                           |
| Asian    | 40, 41, 42, 44, 441, 442, 443, 444, 44411, 44412, 44414 |
| Other    | 51, 52, 53, 54                                          |
| European | 10, 11, 12, 94, 95, 96, 99, " ", ""                     |

### Problems with above coding convention:

- “44415” is missing from Asian group
- MELAA codes (51-53) are recorded as “Other Ethnicity”
- “Other Ethnicity” code (61) missing
- European group contains residual codes (94, 95, 96, 99, " ", "")
- “Chinese” are not represented clearly

### Distribution of original “ag\_eth” (all unique individuals at baseline)

#### Frequency

| Asian | European | Indian | NZMaori | Other | Pacific | <NA> |
|-------|----------|--------|---------|-------|---------|------|
| 45308 | 276933   | 39205  | 62181   | 8907  | 59305   | 306  |

NB: There should be no NA values since `nhi_ethnicg1` contains no NAs

#### Proportion

| Asian | European | Indian | NZMaori | Other | Pacific | <NA>  |
|-------|----------|--------|---------|-------|---------|-------|
| 0.092 | 0.563    | 0.080  | 0.126   | 0.018 | 0.121   | 0.001 |

**NEW “view\_ag\_eth” Classification**

| Label         | Code                                                       |
|---------------|------------------------------------------------------------|
| Maori         | 21                                                         |
| Pacific       | 30, 31, 32, 33, 34, 35, 36, 37                             |
| Indian        | 43, (36 & 43)                                              |
| Chinese       | 42                                                         |
| Asian         | 40, 41, 44, 441, 442, 443, 444, 44411, 44412, 44414, 44415 |
| MELAA         | 51, 52, 53                                                 |
| Other         | 54, 61                                                     |
| European      | 10, 11, 12                                                 |
| No_not_stated | 94, 95, 96, 99, " ", ""                                    |

“Other” includes individuals who write “Klingon” or “Martian” as their response.

This list of ethnic groups can be combined as suited to the individual study, however the default coding for VIEW should be that “MELAA” and “Other” will be combined into “Other”. As this is a very heterogeneous group, it may be left out of analyses that focus on ethnic-specific analyses.

“No\_not\_stated” is defined rather than the default “NA”. The reason is that the MOH have codes precisely for these situation, ranging from “Don’t know” (94), “Refused to Answer” (95), to “Not Stated” (99). If you’re reporting the status of everyone in your cohort of interest, this should be stated as being missing data on ethnicity and not combined with “Other”, as they represent two different types of data.

In previous merges, the European group included “Other” and “NA”. The new coding allows European to be more clearly defined.

**Distribution of proposed new “ag\_eth2” (all unique individuals at baseline)****Frequency**

| Asian | Chinese | European | Indian | MELAA | No_not_stated | NZMaori |
|-------|---------|----------|--------|-------|---------------|---------|
| 18745 | 26563   | 276433   | 39205  | 6797  | 654           | 62181   |
| Other | Pacific | <NA>     |        |       |               |         |
| 2262  | 59305   | 0        |        |       |               |         |

**Proportion**

| Asian | Chinese | European | Indian | MELAA | No_not_stated | NZMaori |
|-------|---------|----------|--------|-------|---------------|---------|
| 0.038 | 0.054   | 0.562    | 0.080  | 0.014 | 0.001         | 0.126   |
| Other | Pacific | <NA>     |        |       |               |         |
| 0.005 | 0.121   | 0.000    |        |       |               |         |

## Appendix A

### Prioritisation Output for Ethnicity

In prioritised output, each respondent is allocated to a single ethnic group using the priority system (Māori, Pacific peoples, Asian, other groups except NZ European; and NZ European). The aim of prioritisation is to ensure that where some need exists to assign people to a single ethnic group, ethnic groups of policy importance, or of small size, are not swamped by the NZ European ethnic group.

This output type is the one most frequently used in Ministry of Health statistics and is also widely used in the health and disability sector for funding calculations, monitoring changes in the ethnic composition of service utilisation, and so on. Its advantage is that it produces data that are easy to work with as each individual appears only once so the sum of the ethnic group populations will add up to the total New Zealand population.

When ethnicity data is to be output to the Ministry of Health National Systems and more than three ethnicities are available to send, the prioritisation method described in the protocols must be used. This will ensure consistency within the national collections.

#### Limitations are that prioritised output:

- places people in specific (high priority because of policy importance) ethnic groups which simplifies yet biases the resulting statistics
- over-represents some groups at the expense of others – for example, Māori gain at the expense of Pacific peoples (approximately 31,542) and Pacific peoples gain at the expense of other groups (34,602) of which most are Pacific/European (30,018)
- goes against the principle of self-identification.

One of the main criteria stipulated in the definition of ethnicity is that a person can belong to more than one ethnic group. The ethnicity question caters for multiple responses. However, the question does not ask people to indicate the ethnic group with which they identify the most strongly; instead, prioritisation makes this choice for them. The question is to remain the same for the 2006 census so, to ensure numerator and denominator consistency (see Section 1.5), asking people to state the ethnicity with which they identify the 'most strongly' is not an option.

## Appendix

Table A1. Crude rates and age-adjusted HR of CVD by risk factors, Norwegian and South Asian men from the Norwegian cohort.

|                              | Norwegian      |                   |                                          |                  | South Asian    |                   |                                          |                  |
|------------------------------|----------------|-------------------|------------------------------------------|------------------|----------------|-------------------|------------------------------------------|------------------|
|                              | No. of persons | No. of CVD events | Crude rate/100 000 person-years (95% CI) | HR (95% CI)      | No. of persons | No. of CVD events | Crude rate/100 000 person-years (95% CI) | HR (95% CI)      |
| <b>Total</b>                 | 6385           | 379               | 703 (636-778)                            |                  | 1239           | 79                | 833 (668-1039)                           |                  |
| <b>Diabetes</b>              |                |                   |                                          |                  |                |                   |                                          |                  |
| <b>No</b>                    | 6167           | 339               | 649 (583-721)                            | 1.00             | 1088           | 59                | 704 (545-908)                            | 1.00             |
| <b>Yes</b>                   | 101            | 28                | 3936 (2718-5701)                         | 3.15 (2.14-4.65) | 103            | 16                | 2166 (1327-3536)                         | 1.61 (0.90-2.86) |
| <b>Missing</b>               | 117            | 12                | 539 (298-973)                            |                  | 48             | 4                 | 1110 (416-2956)                          |                  |
| <b>SBP</b>                   |                |                   |                                          |                  |                |                   |                                          |                  |
| <b>&lt;140</b>               | 4701           | 198               | 493 (429-566)                            | 1.00             | 1068           | 56                | 682 (525-886)                            | 1.00             |
| <b>140-159</b>               | 1373           | 130               | 1150 (969-1366)                          | 1.39 (1.10-1.74) | 150            | 19                | 1681 (1072-2636)                         | 1.44 (0.83-2.49) |
| <b>&gt;160</b>               | 296            | 51                | 2228 (1693-2932)                         | 1.76 (1.28-2.42) | 21             | 4                 | 2865 (1075-7634)                         | 1.51 (0.53-4.28) |
| <b>Missing</b>               | 15             | 0                 |                                          |                  | 0              | 0                 |                                          |                  |
| <b>TC/HDL ratio</b>          |                |                   |                                          |                  |                |                   |                                          |                  |
| <b>&lt;5</b>                 | 4284           | 207               | 568 (495-650)                            | 1.00             | 538            | 21                | 499 (325-765)                            | 1.00             |
| <b>≥ 5</b>                   | 2090           | 170               | 980 (843-1139)                           | 1.64 (1.34-2.00) | 698            | 58                | 1105 (854-1430)                          | 2.14 (1.30-3.52) |
| <b>Missing</b>               | 11             | 2                 | 2328 (582-9307)                          |                  | 3              | 0                 |                                          |                  |
| <b>TC</b>                    |                |                   |                                          |                  |                |                   |                                          |                  |
| <b>&lt; 5 mmol/L</b>         | 1930           | 68                | 410 (324-520)                            | 1.00             | 407            | 19                | 609 (389-955)                            | 1.00             |
| <b>≥ 5 mmol/L</b>            | 4444           | 309               | 830 (742-927)                            | 1.17 (0.90-1.53) | 830            | 60                | 945 (734-1217)                           | 1.49 (0.89-2.49) |
| <b>Missing</b>               | 11             | 2                 | 2328 (582-9307)                          |                  | 2              | 0                 |                                          |                  |
| <b>HDL</b>                   |                |                   |                                          |                  |                |                   |                                          |                  |
| <b>&lt; 1.00 mmol/L</b>      | 1032           | 78                | 915 (733-1142)                           | 1.00             | 525            | 34                | 855 (611-1197)                           | 1.00             |
| <b>≥1.00 mmol/L</b>          | 5343           | 299               | 660 (589-739)                            | 0.61 (0.47-0.78) | 711            | 45                | 821 (613-1099)                           | 0.99 (0.63-1.55) |
| <b>Missing</b>               | 10             | 2                 | 2608 (652-10427)                         |                  | 3              | 0                 |                                          |                  |
| <b>Current daily smokers</b> |                |                   |                                          |                  |                |                   |                                          |                  |
| <b>No</b>                    | 4706           | 231               | 578 (508-657)                            | 1.00             | 905            | 52                | 749 (571-983)                            | 1.00             |
| <b>Yes</b>                   | 1660           | 146               | 1062 (903-1248)                          | 1.86 (1.51-2.29) | 302            | 25                | 1088 (735-1610)                          | 1.43 (0.88-2.30) |
| <b>Missing</b>               | 19             | 2                 | 1236 (309-4941)                          |                  | 32             | 2                 | 831 (208-3323)                           |                  |

CI, confidence interval; CVD, cardiovascular disease; HDL, high density lipoprotein; HR, hazard ratio; TC, total cholesterol; SBP, systolic blood pressure

APPENDIX

Table A2. Crude rates and age-adjusted HR of CVD by risk factors, Norwegian and South Asian women from the Norwegian cohort.

|                              | Norwegian      |                   |                                          |                  | South Asian    |                   |                                          |                  |
|------------------------------|----------------|-------------------|------------------------------------------|------------------|----------------|-------------------|------------------------------------------|------------------|
|                              | No. of persons | No. of CVD events | Crude rate/100 000 person-years (95% CI) | HR (95% CI)      | No. of persons | No. of CVD events | Crude rate/100 000 person-years (95% CI) | HR (95% CI)      |
| <b>Total</b>                 | 8015           | 259               | 378 (335-427)                            |                  | 967            | 26                | 341 (232-501)                            |                  |
| <b>Diabetes</b>              |                |                   |                                          |                  |                |                   |                                          |                  |
| <b>No</b>                    | 7657           | 237               | 361 (318-410)                            | 1.00             | 816            | 17                | 262 (163-422)                            | 1.00             |
| <b>Yes</b>                   | 105            | 11                | 1305 (723-2356)                          | 2.79 (1.52-5.11) | 100            | 9                 | 1212 (630-2329)                          | 2.74 (1.21-6.22) |
| <b>Missing</b>               | 253            | 11                | 539 (298-973)                            |                  | 51             | 0                 |                                          |                  |
| <b>SBP</b>                   |                |                   |                                          |                  |                |                   |                                          |                  |
| <b>&lt;140</b>               | 6823           | 151               | 257 (219-302)                            | 1.00             | 876            | 18                | 260 (164-412)                            | 1.00             |
| <b>140-159</b>               | 920            | 76                | 999 (798-1251)                           | 1.82 (1.37-2.43) | 67             | 4                 | 774 (291-2062)                           | 1.45 (0.48-4.34) |
| <b>&gt;160</b>               | 266            | 31                | 1450 (1020-2062)                         | 2.11 (1.42-3.15) | 23             | 4                 | 2378 (892-6335)                          | 2.42 (0.76-7.71) |
| <b>Missing</b>               | 6              | 1                 | 2128 (300-15106)                         |                  | 1              | 0                 |                                          |                  |
| <b>TC/HDL ratio</b>          |                |                   |                                          |                  |                |                   |                                          |                  |
| <b>&lt;5</b>                 | 7225           | 203               | 328 (286-376)                            | 1.00             | 749            | 17                | 287 (178-462)                            | 1.00             |
| <b>≥ 5</b>                   | 781            | 54                | 833 (638-1088)                           | 1.79 (1.33-2.42) | 215            | 9                 | 537 (279-1032)                           | 1.46 (0.65-3.30) |
| <b>Missing</b>               | 9              | 2                 | 3122 (781-12483)                         |                  |                | 0                 |                                          |                  |
| <b>TC</b>                    |                |                   |                                          |                  |                |                   |                                          |                  |
| <b>&lt; 5 mmol/L</b>         | 3004           | 44                | 169 (125-227)                            | 1.00             | 524            | 8                 | 193 (97-386)                             | 1.00             |
| <b>≥ 5 mmol/L</b>            | 5002           | 213               | 503 (440-576)                            | 1.40 (1.00-1.97) | 440            | 18                | 521 (328-826)                            | 1.54 (0.65-3.64) |
| <b>Missing</b>               | 9              | 2                 | 3122 (781-12483)                         |                  | 3              | 0                 |                                          |                  |
| <b>HDL</b>                   |                |                   |                                          |                  |                |                   |                                          |                  |
| <b>&lt; 1.2 mmol/L</b>       | 1057           | 52                | 587 (447-770)                            | 1.00             | 465            | 12                | 329 (187-578)                            | 1.00             |
| <b>≥1.2 mmol/L</b>           | 6949           | 205               | 344 (300-395)                            | 0.55 (0.40-0.74) | 499            | 14                | 354 (210-598)                            | 0.77 (0.36-1.69) |
| <b>Missing</b>               | 9              | 2                 | 3122 (781-12483)                         |                  | 3              | 0                 |                                          |                  |
| <b>Current daily smokers</b> |                |                   |                                          |                  |                |                   |                                          |                  |
| <b>No</b>                    | 5461           | 134               | 285 (241-338)                            | 1.00             | 883            | 24                | 344 (231-514)                            | 1.00             |
| <b>Yes</b>                   | 2510           | 119               | 564 (471-675)                            | 2.22 (1.73-2.84) | 13             | 0                 |                                          |                  |
| <b>Missing</b>               | 44             | 6                 | 1759 (790-3916)                          |                  | 71             | 2                 | 365 (91-1461)                            |                  |

CI, confidence interval; CVD, cardiovascular disease; HDL, high density lipoprotein; HR, hazard ratio; TC, total cholesterol; SBP, systolic blood pressure

## APPENDIX

Table A3. Crude rates and age-adjusted HR of CVD by risk factors, European and Indian New Zealand men from the New Zealand cohort.

|                              | European       |                   |                                          |                  | Indian         |                   |                                          |                  |
|------------------------------|----------------|-------------------|------------------------------------------|------------------|----------------|-------------------|------------------------------------------|------------------|
|                              | No. of persons | No. of CVD events | Crude rate/100 000 person-years (95% CI) | HR (95% CI)      | No. of persons | No. of CVD events | Crude rate/100 000 person-years (95% CI) | HR (95% CI)      |
| <b>Total</b>                 | 63 319         | 1 518             | 815 (775-857)                            |                  | 9 997          | 273               | 933 (828-1050)                           |                  |
| <b>Type 2 diabetes</b>       |                |                   |                                          |                  |                |                   |                                          |                  |
| <b>No</b>                    | 57 760         | 1 241             | 728 (689-770)                            | 1.00             | 7 641          | 158               | 712 (610-833)                            | 1.00             |
| <b>Yes</b>                   | 5 559          | 277               | 1739 (1546-1957)                         | 1.92 (1.68-2.19) | 2 356          | 115               | 1622 (1351-1947)                         | 1.72 (1.34-2.20) |
| <b>Missing</b>               | 0              |                   |                                          |                  | 0              |                   |                                          |                  |
| <b>SBP</b>                   |                |                   |                                          |                  |                |                   |                                          |                  |
| <b>&lt;140</b>               | 42 666         | 776               | 632 (589-678)                            | 1.00             | 7 888          | 188               | 805 (698-929)                            | 1.00             |
| <b>140-159</b>               | 16 417         | 514               | 1030 (945-1123)                          | 1.35 (1.20-1.51) | 1 723          | 68                | 1431 (1128-1814)                         | 1.37 (1.03-1.81) |
| <b>&gt;160</b>               | 4 236          | 228               | 1675 (1471-1908)                         | 2.03 (1.75-2.36) | 386            | 17                | 1462 (909-2352)                          | 1.22 (0.74-2.02) |
| <b>Missing</b>               | 0              |                   |                                          |                  | 0              |                   |                                          |                  |
| <b>TC/HDL ratio</b>          |                |                   |                                          |                  |                |                   |                                          |                  |
| <b>&lt;5</b>                 | 45 177         | 994               | 756 (711-805)                            | 1.00             | 6 379          | 178               | 926 (799-1072)                           | 1.00             |
| <b>≥ 5</b>                   | 18 139         | 524               | 955 (876-1040)                           | 1.58 (1.42-1.76) | 3 617          | 95                | 946 (774-1157)                           | 1.28 (1.00-1.65) |
| <b>Missing*</b>              | 3              | 0                 |                                          |                  | 1              | 0                 |                                          |                  |
| <b>TC</b>                    |                |                   |                                          |                  |                |                   |                                          |                  |
| <b>&lt; 5 mmol/L</b>         | 20 226         | 395               | 879 (797-970)                            | 1.00             | 4 450          | 103               | 841 (693-1020)                           | 1.00             |
| <b>≥ 5 mmol/L</b>            | 36 071         | 684               | 756 (702-815)                            | 1.01 (0.89-1.14) | 5 130          | 137               | 974 (824-1152)                           | 1.36 (1.05-1.76) |
| <b>Missing*</b>              | 7 022          | 439               | 861 (785-946)                            |                  | 417            | 33                | 1114 (792-1567)                          |                  |
| <b>HDL</b>                   |                |                   |                                          |                  |                |                   |                                          |                  |
| <b>&lt; 1.00 mmol/L</b>      | 2 325          | 55                | 986 (757-1284)                           | 1.00             | 561            | 15                | 1327 (800-2202)                          | 1.00             |
| <b>≥1.00 mmol/L</b>          | 10 920         | 323               | 891 (799-993)                            | 0.87 (0.66-1.17) | 1 231          | 39                | 1140 (833-1561)                          | 0.62 (0.33-1.14) |
| <b>Missing*</b>              | 50 074         | 1 140             | 789 (744-836)                            |                  | 8 205          | 219               | 886 (776-1011)                           |                  |
| <b>Current daily smokers</b> |                |                   |                                          |                  |                |                   |                                          |                  |
| <b>No</b>                    | 55 587         | 1 197             | 733 (692-776)                            | 1.00             | 9 105          | 242               | 913 (805-1035)                           | 1.00             |
| <b>Yes</b>                   | 7 731          | 321               | 1396 (1252-1558)                         | 2.29 (2.02-2.59) | 892            | 31                | 1123 (790-1597)                          | 1.45 (0.99-2.11) |
| <b>Missing</b>               | 1              | 0                 |                                          |                  | 0              |                   |                                          |                  |

CI, confidence interval; CVD, cardiovascular disease; HDL, high density lipoprotein; HR, hazard ratio; TC, total cholesterol; SBP, systolic blood pressure. \*The number of missing information is different for TC/HDL ratio than for TC and HDL separately. This is because the risk factors included in the PREDICT risk assessment (age, gender, smoking, diabetes, systolic BP and total cholesterol/HDL ratio) was compulsory for assessing risk. Risk factors not compulsory for risk assessment consequently have more missing information (e.g. the HDL and TC)



## APPENDIX

Table A4. Crude rates and age-adjusted HR of CVD by risk factors, European and Indian New Zealand women from the New Zealand cohort.

|                              | European       |                   |                                          |                  | Indian         |                   |                                          |                  |
|------------------------------|----------------|-------------------|------------------------------------------|------------------|----------------|-------------------|------------------------------------------|------------------|
|                              | No. of persons | No. of CVD events | Crude rate/100 000 person-years (95% CI) | HR               | No. of persons | No. of CVD events | Crude rate/100 000 person-years (95% CI) | HR               |
| <b>Total</b>                 | 49 094         | 757               | 528 (492-567)                            |                  | 7 039          | 106               | 531 (439-643)                            |                  |
| <b>Type 2 diabetes</b>       |                |                   |                                          |                  |                |                   |                                          |                  |
| <b>No</b>                    | 44 880         | 635               | 485 (448-524)                            | 1.00             | 5 010          | 50                | 358 (271-472)                            | 1.00             |
| <b>Yes</b>                   | 4 214          | 122               | 994 (832-1187)                           | 1.93 (1.59-2.35) | 2 029          | 56                | 936 (720-1216)                           | 2.29 (1.55-3.37) |
| <b>Missing</b>               | 0              |                   |                                          |                  | 0              |                   |                                          |                  |
| <b>SBP</b>                   |                |                   |                                          |                  |                |                   |                                          |                  |
| <b>&lt;140</b>               | 32 178         | 395               | 436 (395-481)                            | 1.00             | 5 370          | 56                | 371 (285-482)                            | 1.00             |
| <b>140-159</b>               | 13 019         | 258               | 646 (572-730)                            | 1.22 (1.04-1.44) | 1 281          | 34                | 919 (656-1286)                           | 2.11 (1.37-3.26) |
| <b>&gt;160</b>               | 3 896          | 104               | 813 (671-985)                            | 1.42 (1.14-1.77) | 388            | 16                | 1388 (851-2266)                          | 2.99 (1.70-5.27) |
| <b>Missing</b>               | 1              | 0                 |                                          |                  | 0              |                   |                                          |                  |
| <b>TC/HDL ratio</b>          |                |                   |                                          |                  |                |                   |                                          |                  |
| <b>&lt;5</b>                 | 42 800         | 626               | 507 (469-549)                            | 1.00             | 5 895          | 89                | 527 (428-648)                            | 1.00             |
| <b>≥ 5</b>                   | 6 289          | 131               | 658 (555-781)                            | 1.42 (1.17-1.71) | 1 143          | 17                | 559 (347-898)                            | 1.11 (0.66-1.86) |
| <b>Missing*</b>              | 5              | 0                 |                                          |                  | 1              | 0                 |                                          |                  |
| <b>TC</b>                    |                |                   |                                          |                  |                |                   |                                          |                  |
| <b>&lt; 5 mmol/L</b>         | 10 940         | 127               | 515 (433-613)                            | 1.00             | 3 277          | 57                | 639 (493-828)                            | 1.00             |
| <b>≥ 5 mmol/L</b>            | 32 974         | 415               | 516 (469-569)                            | 0.96 (0.79-1.17) | 3 515          | 37                | 398 (289-550)                            | 0.62 (0.41-0.94) |
| <b>Missing*</b>              | 5 180          | 215               | 561 (491-641)                            |                  | 247            | 12                | 689 (391-1212)                           |                  |
| <b>HDL</b>                   |                |                   |                                          |                  |                |                   |                                          |                  |
| <b>&lt; 1.2 mmol/L</b>       | 1 852          | 26                | 529 (360-776)                            | 1.00             | 568            | 9                 | 781 (406-1501)                           | 1.00             |
| <b>≥1.2 mmol/L</b>           | 7 985          | 149               | 578 (492-678)                            | 0.97 (0.64-1.47) | 866            | 14                | 600 (355-1013)                           | 0.75 (0.32-1.77) |
| <b>Missing*</b>              | 39 257         | 582               | 517 (477-561)                            |                  | 5 605          | 83                | 504 (406-625)                            |                  |
| <b>Current daily smokers</b> |                |                   |                                          |                  |                |                   |                                          |                  |
| <b>No</b>                    | 43 994         | 595               | 466 (430-505)                            | 1.00             | 6 973          | 104               | 526 (434-638)                            | 1.00             |
| <b>Yes</b>                   | 5 100          | 162               | 1038 (890-1211)                          | 2.74 (2.30-3.27) | 66             | 2                 | 1090 (272-4357)                          | 2.60 (0.64-10.5) |
| <b>Missing</b>               | 0              |                   |                                          |                  | 0              |                   |                                          |                  |

CI, confidence interval; CVD, cardiovascular disease; HDL, high density lipoprotein; HR, hazard ratio; TC, total cholesterol; SBP, systolic blood pressure. \*The number of missing information is different for TC/HDL ratio than for TC and HDL separately. This is because the risk factors included in the PREDICT risk assessment (age, gender, smoking, diabetes, systolic BP and total cholesterol/HDL ratio) was compulsory for assessing risk. Risk factors not compulsory for risk assessment consequently have more missing information (e.g. the HDL and TC).

STROBE 2007 (v4) Statement—Checklist of items that should be included in reports of *cohort studies*

| Section/Topic                | Item # | Recommendation                                                                                                                                                                       | Reported on page # |
|------------------------------|--------|--------------------------------------------------------------------------------------------------------------------------------------------------------------------------------------|--------------------|
| Title and abstract           | 1      | (a) Indicate the study's design with a commonly used term in the title or the abstract                                                                                               | 1,2                |
|                              |        | (b) Provide in the abstract an informative and balanced summary of what was done and what was found                                                                                  | 2-3                |
| <b>Introduction</b>          |        |                                                                                                                                                                                      |                    |
| Background/rationale         | 2      | Explain the scientific background and rationale for the investigation being reported                                                                                                 | 4-5                |
| Objectives                   | 3      | State specific objectives, including any prespecified hypotheses                                                                                                                     | 5                  |
| <b>Methods</b>               |        |                                                                                                                                                                                      |                    |
| Study design                 | 4      | Present key elements of study design early in the paper                                                                                                                              | 5                  |
| Setting                      | 5      | Describe the setting, locations, and relevant dates, including periods of recruitment, exposure, follow-up, and data collection                                                      | 5-8                |
| Participants                 | 6      | (a) Give the eligibility criteria, and the sources and methods of selection of participants. Describe methods of follow-up                                                           | 6-8                |
|                              |        | (b) For matched studies, give matching criteria and number of exposed and unexposed                                                                                                  |                    |
| Variables                    | 7      | Clearly define all outcomes, exposures, predictors, potential confounders, and effect modifiers. Give diagnostic criteria, if applicable                                             | 6-9                |
| Data sources/<br>measurement | 8*     | For each variable of interest, give sources of data and details of methods of assessment (measurement). Describe comparability of assessment methods if there is more than one group | 5-9                |
| Bias                         | 9      | Describe any efforts to address potential sources of bias                                                                                                                            | 10                 |
| Study size                   | 10     | Explain how the study size was arrived at                                                                                                                                            | 6-8,11             |
| Quantitative variables       | 11     | Explain how quantitative variables were handled in the analyses. If applicable, describe which groupings were chosen and why                                                         | 9-10               |
| Statistical methods          | 12     | (a) Describe all statistical methods, including those used to control for confounding                                                                                                | 9-10               |
|                              |        | (b) Describe any methods used to examine subgroups and interactions                                                                                                                  | 9-10               |
|                              |        | (c) Explain how missing data were addressed                                                                                                                                          | 10                 |
|                              |        | (d) If applicable, explain how loss to follow-up was addressed                                                                                                                       | 10                 |
|                              |        | (e) Describe any sensitivity analyses                                                                                                                                                | 10                 |
| <b>Results</b>               |        |                                                                                                                                                                                      |                    |

1  
2  
3  
4  
5  
6  
7  
8  
9  
10  
11  
12  
13  
14  
15  
16  
17  
18  
19  
20  
21  
22  
23  
24  
25  
26  
27  
28  
29  
30  
31  
32  
33  
34  
35  
36  
37  
38  
39  
40  
41  
42  
43  
44  
45  
46  
47  
48  
49

|                  |     |                                                                                                                                                                                                   |                                                                                                                                                                                                                                                                                                    |
|------------------|-----|---------------------------------------------------------------------------------------------------------------------------------------------------------------------------------------------------|----------------------------------------------------------------------------------------------------------------------------------------------------------------------------------------------------------------------------------------------------------------------------------------------------|
| Participants     | 13* | (a) Report numbers of individuals at each stage of study—eg numbers potentially eligible, examined for eligibility, confirmed eligible, included in the study, completing follow-up, and analysed | 11                                                                                                                                                                                                                                                                                                 |
|                  |     | (b) Give reasons for non-participation at each stage                                                                                                                                              | We did not have information about reasons for non-participation in CONOR, but participation rates are given on page 7 and the possibility of self-selection bias is discussed on page 18. This was not relevant for the PREDICT cohort since it was based on contact with the primary health care. |
|                  |     | (c) Consider use of a flow diagram                                                                                                                                                                | Different persons were involved in the exclusion of participants, so it was easier to describe this process in text.                                                                                                                                                                               |
| Descriptive data | 14* | (a) Give characteristics of study participants (eg demographic, clinical, social) and information on exposures and potential confounders                                                          | 11-13                                                                                                                                                                                                                                                                                              |
|                  |     | (b) Indicate number of participants with missing data for each variable of interest                                                                                                               | Tables A1-A4 in the appendices                                                                                                                                                                                                                                                                     |
|                  |     | (c) Summarise follow-up time (eg, average and total amount)                                                                                                                                       | 12 (Table 1)                                                                                                                                                                                                                                                                                       |
| Outcome data     | 15* | Report numbers of outcome events or summary measures over time                                                                                                                                    | 13                                                                                                                                                                                                                                                                                                 |

|    |                          |    |                                                                                                                                                                                                              |
|----|--------------------------|----|--------------------------------------------------------------------------------------------------------------------------------------------------------------------------------------------------------------|
| 1  |                          |    |                                                                                                                                                                                                              |
| 2  |                          |    |                                                                                                                                                                                                              |
| 3  |                          |    |                                                                                                                                                                                                              |
| 4  | Main results             | 16 | (a) Give unadjusted estimates and, if applicable, confounder-adjusted estimates and their precision (eg, 95% confidence interval). Make clear which confounders were adjusted for and why they were included |
| 5  |                          |    |                                                                                                                                                                                                              |
| 6  |                          |    | (b) Report category boundaries when continuous variables were categorized                                                                                                                                    |
| 7  |                          |    |                                                                                                                                                                                                              |
| 8  |                          |    | (c) If relevant, consider translating estimates of relative risk into absolute risk for a meaningful time period                                                                                             |
| 9  |                          |    |                                                                                                                                                                                                              |
| 10 | Other analyses           | 17 | Report other analyses done—eg analyses of subgroups and interactions, and sensitivity analyses                                                                                                               |
| 11 |                          |    |                                                                                                                                                                                                              |
| 12 |                          |    | Sensitivity analyses are reported on page 14, 16                                                                                                                                                             |
| 13 |                          |    |                                                                                                                                                                                                              |
| 14 | <b>Discussion</b>        |    |                                                                                                                                                                                                              |
| 15 | Key results              | 18 | Summarise key results with reference to study objectives                                                                                                                                                     |
| 16 | <b>Limitations</b>       |    |                                                                                                                                                                                                              |
| 17 |                          |    |                                                                                                                                                                                                              |
| 18 | Interpretation           | 20 | Give a cautious overall interpretation of results considering objectives, limitations, multiplicity of analyses, results from similar studies, and other relevant evidence                                   |
| 19 |                          |    |                                                                                                                                                                                                              |
| 20 | Generalisability         | 21 | Discuss the generalisability (external validity) of the study results                                                                                                                                        |
| 21 |                          |    |                                                                                                                                                                                                              |
| 22 | <b>Other information</b> |    |                                                                                                                                                                                                              |
| 23 | Funding                  | 22 | Give the source of funding and the role of the funders for the present study and, if applicable, for the original study on which the present article is based                                                |
| 24 |                          |    |                                                                                                                                                                                                              |
| 25 |                          |    |                                                                                                                                                                                                              |
| 26 |                          |    |                                                                                                                                                                                                              |

\*Give information separately for cases and controls in case-control studies and, if applicable, for exposed and unexposed groups in cohort and cross-sectional studies.

**Note:** An Explanation and Elaboration article discusses each checklist item and gives methodological background and published examples of transparent reporting. The STROBE checklist is best used in conjunction with this article (freely available on the Web sites of PLoS Medicine at <http://www.plosmedicine.org/>, Annals of Internal Medicine at <http://www.annals.org/>, and Epidemiology at <http://www.epidem.com/>). Information on the STROBE Initiative is available at [www.strobe-statement.org](http://www.strobe-statement.org).

# BMJ Open

## Can traditional risk factors explain the higher risk of cardiovascular disease in South Asians compared to Europeans in Norway and New Zealand? Two cohort studies

|                                 |                                                                                                                                                                                                                                                                                                                                                                                                                                                                                                                                                                                                                                                                                                                                                                                                                                                                                                                                                                                                                                                                  |
|---------------------------------|------------------------------------------------------------------------------------------------------------------------------------------------------------------------------------------------------------------------------------------------------------------------------------------------------------------------------------------------------------------------------------------------------------------------------------------------------------------------------------------------------------------------------------------------------------------------------------------------------------------------------------------------------------------------------------------------------------------------------------------------------------------------------------------------------------------------------------------------------------------------------------------------------------------------------------------------------------------------------------------------------------------------------------------------------------------|
| Journal:                        | <i>BMJ Open</i>                                                                                                                                                                                                                                                                                                                                                                                                                                                                                                                                                                                                                                                                                                                                                                                                                                                                                                                                                                                                                                                  |
| Manuscript ID                   | bmjopen-2017-016819.R2                                                                                                                                                                                                                                                                                                                                                                                                                                                                                                                                                                                                                                                                                                                                                                                                                                                                                                                                                                                                                                           |
| Article Type:                   | Research                                                                                                                                                                                                                                                                                                                                                                                                                                                                                                                                                                                                                                                                                                                                                                                                                                                                                                                                                                                                                                                         |
| Date Submitted by the Author:   | 08-Aug-2017                                                                                                                                                                                                                                                                                                                                                                                                                                                                                                                                                                                                                                                                                                                                                                                                                                                                                                                                                                                                                                                      |
| Complete List of Authors:       | Rabanal, Kjersti; Nasjonalt folkehelseinstitutt, Division for Mental and Physical Health<br>Meyer, Haakon; Norwegian Institute of Public Health, Division for Mental and Physical Health; Universitetet i Oslo Avdeling for samfunnsmedisin<br>Tell, Grethe; University of Bergen, Department of Global Public Health and Primary Care; Nasjonalt folkehelseinstitutt, Division for Health Data and Digitalisation<br>Iglund, Jannicke; Faculty of Medicine and Dentistry, University of Bergen, Global Public Health and Primary Care<br>Pylypchuk, Romana; University of Auckland, Epidemiology and Biostatistic, School of Population Health<br>Mehta, Suneela; University of Auckland, Epidemiology and Biostatistics, School of Population Health<br>Kumar, Bernadette; Oslo University Hospital, Norwegian Center for Minority Health Research<br>Jenum, Anne; University of Oslo,<br>Selmer, Randi; Norwegian Institute of Public Health, Division for Mental and Physical Health<br>Jackson, Rod; University of Auckland, Epidemiology and Biostatistics |
| <b>Primary Subject Heading</b>: | Epidemiology                                                                                                                                                                                                                                                                                                                                                                                                                                                                                                                                                                                                                                                                                                                                                                                                                                                                                                                                                                                                                                                     |
| Secondary Subject Heading:      | Cardiovascular medicine, Public health                                                                                                                                                                                                                                                                                                                                                                                                                                                                                                                                                                                                                                                                                                                                                                                                                                                                                                                                                                                                                           |
| Keywords:                       | cardiovascular disease, risk factors, South Asians, ethnicity, prospective, cohort                                                                                                                                                                                                                                                                                                                                                                                                                                                                                                                                                                                                                                                                                                                                                                                                                                                                                                                                                                               |
|                                 |                                                                                                                                                                                                                                                                                                                                                                                                                                                                                                                                                                                                                                                                                                                                                                                                                                                                                                                                                                                                                                                                  |

SCHOLARONE™  
Manuscripts

1  
2  
3  
4 **Can traditional risk factors explain the higher risk of cardiovascular disease in South Asians**  
5 **compared to Europeans in Norway and New Zealand? Two cohort studies**  
6

7 Kjersti S Rabanal<sup>a</sup>, Haakon E Meyer<sup>a, b</sup>, Grethe S Tell<sup>c, d</sup>, Jannicke Igland<sup>d</sup>, Romana Pylypchuk<sup>e</sup>,  
8 Suneela Mehta<sup>e</sup>, Bernadette Kumar<sup>f</sup>, Anne Karen Jenum<sup>g</sup>, Randi M Selmer<sup>a</sup>, Rod Jackson<sup>e</sup>  
9

10  
11 <sup>a</sup> Division for Mental and Physical Health, Norwegian Institute of Public Health, Oslo, Norway  
12

13 <sup>b</sup> Department of Community Medicine, Institute of Health and Society, University of Oslo,  
14 Oslo, Norway  
15

16 <sup>c</sup> Division for Health Data and Digitalisation, Norwegian Institute of Public Health, Bergen,  
17 Norway  
18

19 <sup>d</sup> Department of Global Public Health and Primary Care, University of Bergen, Norway  
20

21 <sup>e</sup> School of Population Health, University of Auckland, Auckland, New Zealand  
22

23 <sup>f</sup> Norwegian Center for Minority Health Research, Oslo, Norway  
24

25 <sup>g</sup> Institute of Health and Society, Faculty of Health and Society, University of Oslo, Oslo,  
26 Norway  
27  
28  
29

30 **Corresponding author**

31 Kjersti S Rabanal

32 Address: Norwegian Institute of Public Health, P.O. Box 4404, Nydalen, 0403 Oslo, Norway

33 Telephone number: +47 22078118

34 E-mail: [kjersti.stormark.rabanal@fhi.no](mailto:kjersti.stormark.rabanal@fhi.no), [kjersti.rabanal@hotmail.com](mailto:kjersti.rabanal@hotmail.com)  
35  
36

37 Wordcount, abstract: 298

38 Wordcount, manuscript text: 4660  
39  
40

41 Keywords: cardiovascular disease, risk factors, South Asians, ethnicity, prospective, cohort  
42  
43  
44  
45  
46  
47  
48  
49  
50  
51  
52  
53  
54  
55  
56  
57  
58  
59  
60

**ABSTRACT**

**Objectives** The objective was to prospectively examine potential differences in the risk of first cardiovascular disease (CVD) events between South Asians and Europeans living in Norway and New Zealand, and to investigate whether traditional risk factors could explain any differences.

**Methods** We included participants (30-74 years) without prior CVD in a Norwegian (n=16 606) and a New Zealand (n=129 449) cohort. Ethnicity and cardiovascular risk factor information was linked with hospital registry data and cause of death registries to identify subsequent CVD events. We used Cox proportional hazards regression to investigate the relationship between risk factors and subsequent CVD for South Asians and Europeans, and to calculate age-adjusted hazard ratios (HRs) for CVD in South Asians versus Europeans in the two cohorts separately. We sequentially added the major CVD risk factors (blood pressure, lipids, diabetes and smoking) to study their explanatory role in observed ethnic CVD risk differences.

**Results** South Asians had higher total cholesterol (TC)/high density lipoprotein (HDL) ratio and more diabetes at baseline than Europeans, but lower blood pressure and smoking levels. South Asians had increased age-adjusted risk of CVD compared to Europeans (87-92% higher in the Norwegian cohort and 42-75% higher in the New Zealand cohort) and remained with significantly increased risk after adjusting for all major CVD risk factors. Adjusted HRs for South Asians versus Europeans in the Norwegian cohort were 1.57; 95% CI 1.19-2.07 in men and 1.76; 95% CI 1.09-2.82 in women. Corresponding figures for the New Zealand cohort were 1.64; 95% CI 1.43-1.88 in men and 1.39; 95% CI 1.11-1.73 in women.

1  
2  
3 **Conclusion** Differences in TC/HDL ratio and diabetes appear to explain some of the excess  
4  
5 risk of CVD in South Asians compared to Europeans. Preventing dyslipidaemia and diabetes  
6  
7 in South Asians may therefore help reduce their excess risk of CVD.  
8  
9

#### 10 11 12 13 **Strengths and limitations of this study**

- 14  
15 • This is one of few prospective investigations of cardiovascular disease and its risk factors  
16 in South Asian populations living in Western countries.  
17
- 18  
19 • A special feature is the inclusion of prospective data from two different countries  
20 enhancing the external validity of the findings.  
21  
22
- 23  
24 • The two cohorts differed in how participants were recruited and how information about  
25 risk factor levels was collected at baseline.  
26  
27
- 28  
29 • A limited number of South Asians in the Norwegian cohort and short follow up time in  
30 the New Zealand cohort restricted the statistical power in our analyses.  
31  
32  
33  
34  
35  
36  
37  
38  
39  
40  
41  
42  
43  
44  
45  
46  
47  
48  
49  
50  
51  
52  
53  
54  
55  
56  
57  
58  
59  
60



## INTRODUCTION

Immigrants from South Asia (countries in the Indian subcontinent such as India, Pakistan, Sri Lanka and Bangladesh) who have settled in Western countries have increased risk of cardiovascular disease (CVD) compared to their host populations of European origin[1]. This excess risk has been documented in several countries, especially the increased risk of coronary heart disease (CHD)[2-4]. We recently found that South Asian immigrants in Norway had more than two-fold higher risk of acute myocardial infarction (AMI) than ethnic Norwegians and an increased risk of stroke (26% higher in men and 58% higher in women)[5]. Collaborators in New Zealand found a higher risk of CVD in Indians compared to the European New Zealand population[6].

The mechanisms underlying the increased risk of CVD in South Asian populations are mostly unknown[1]. Few studies have examined the prospective relationship between CVD risk factors and subsequent CVD among South Asians[4, 7-9], despite the urgent need for such studies being addressed for more than ten years ago[10]. The two large and multinational case-control studies, Interheart[11] and Interstroke,[12] indicate that different populations share the same risk factors and that the relationship between risk factors and CVD is similar in different populations around the world. The Interheart study also concluded that the earlier age of AMI in South Asians can be largely attributed to higher risk factor levels at younger ages[13]. However, the Interheart and Interstroke studies are both case-control studies. In both Norway and New Zealand, South Asians have been found to have similar or higher mean total cholesterol (TC) to high density lipoprotein (HDL) ratio and higher prevalence of diabetes compared to the European majority populations[14-17]. However, they also have lower levels of smoking (especially women) and mean systolic blood pressure (SBP) than the European majority populations. Whether the higher risk of CVD among South

1  
2  
3 Asians in Norway and New Zealand is due to higher levels of certain risk factors have not  
4  
5 previously been studied.  
6  
7

8  
9 Due to the dearth of prospective data on the relationship between risk factors and CVD  
10  
11 among South Asians, we aimed to prospectively examine possible differences in the risk of a  
12  
13 first CVD event between South Asians and Europeans using cohort studies from Norway and  
14  
15 New Zealand, and to examine whether traditional CVD risk factors could explain such  
16  
17 differences. Since the two cohorts differ in several aspects we do not intend to compare the  
18  
19 two cohorts directly, but mainly focus on within-country comparisons.  
20  
21  
22

## 23 **MATERIAL AND METHODS**

### 24 **The New Zealand PREDICT-CVD cohort**

25  
26 We used data from the PREDICT-CVD cohort, collected through use of the PREDICT web-  
27  
28 based decision support program in New Zealand for the assessment and management of  
29  
30 CVD risk during primary health care consultations[18]. The study methods and data  
31  
32 definitions are described in detail elsewhere[18, 19]. In short, the software has been  
33  
34 integrated with commonly used primary care management systems, and allows  
35  
36 systematically coded CVD risk data to be automatically and anonymously extracted from  
37  
38 patients' electronic medical records and augmented where required by primary care  
39  
40 staff[18, 19]. The cardiovascular profile data was subsequently linked, using an encrypted  
41  
42 national health identifier number to national and regional health datasets with information  
43  
44 about hospitalisations, deaths, publicly funded drug dispensing and laboratory test claims  
45  
46 and results[19].  
47  
48  
49  
50  
51  
52

53  
54 The PREDICT software is used in around 35% of New Zealand primary care practices mainly  
55  
56 in the Auckland and Northland regions,[19] which serve around 1.7 million people,  
57  
58  
59  
60

1  
2  
3 representing around 37 % of the New Zealand population[20]. Any patient with their CVD  
4  
5 risk assessed by a general practitioner (GP) or practice nurse into online PREDICT-CVD forms  
6  
7 are included in the PREDICT cohort.  
8  
9

10  
11 New Zealand CVD risk management guidelines recommend that all men over 45 years and all  
12  
13 women over 55 years have a regular CVD risk assessment[21]. Specified high-CVD risk  
14  
15 groups, including those of South Asian ethnicity, are recommended to undergo a risk  
16  
17 assessment ten years earlier than the general population.  
18  
19

20  
21 We used PREDICT data from August 2002 until September 2012. Members of the cohort  
22  
23 were enrolled and examined continuously throughout this period via their contact with the  
24  
25 primary health care. We included individuals aged 30 to 74 years since the dataset was  
26  
27 comprised of people undergoing a risk assessment based on a Framingham risk score  
28  
29 intended for people in this age group[22]. Using information from the GP, hospital  
30  
31 discharges and medication dispensing, we excluded persons with a history of CVD (CHD  
32  
33 (including angina), stroke, TIA, peripheral vascular disease (PVD), percutaneous coronary  
34  
35 intervention (PCI) or coronary artery bypass grafting (CABG)), or atrial fibrillation at baseline  
36  
37 (n=24 537), and people with overt renal disease, those who had eGFR  $\leq$  29 and those with  
38  
39 prior hospitalisations for congestive heart failure or who were on loop diuretics at baseline  
40  
41 (n=1582). Only subjects with European or Indian background were included. The risk factor  
42  
43 measurements in the PREDICT cohort were extracted from a standardised electronic  
44  
45 template that primary care practitioners completed. The SBP was based on the mean of the  
46  
47 last two recordings done by the GP or practice nurse, in most cases with a manual mercury  
48  
49 sphygmomanometer. Blood lipid and glucose or HbA1c measurements were carried out in  
50  
51 the community laboratories routinely used by general practitioners and smoking status and  
52  
53  
54  
55  
56  
57  
58  
59  
60

1  
2  
3 other risk factor data was measured using a standard questionnaire completed by a primary  
4  
5 care practitioner.  
6  
7

### 8 **Cohort of Norway**

9  
10 We included participants from three surveys conducted during 2000-2002 in Oslo, Norway;  
11  
12 The Oslo Health Study (HUBRO), The Oslo Immigrant Health Study (I-HUBRO) and The  
13  
14 Romsås in Motion study (MoRo II) (n=26 709), which are part of the Cohort of Norway  
15  
16 (CONOR)[23]; a collection of health data and blood samples from several Norwegian health  
17  
18 surveys. Participation rates for the three studies were 40-46%[23].  
19  
20

21  
22 All CONOR surveys followed the same standard procedure for collection of data from self-  
23  
24 administered questionnaires, physical measurements and blood samples. The CONOR  
25  
26 questionnaire provided information on self-reported diabetes, smoking, use of blood  
27  
28 pressure and/or lipid lowering medication and family history of CVD. All participants  
29  
30 attended a clinical examination and non-fasting venous blood samples were drawn. SBP was  
31  
32 measured by an automatic device (DINAMAP, Criticon, Tampa, FL,USA) after 2 minutes of  
33  
34 seated resting. Three recordings were made at 1-min intervals. For the analyses we used the  
35  
36 average of the second and third SBP measurements. The blood samples were subsequently  
37  
38 measured for total cholesterol (TC) and HDL cholesterol[23].  
39  
40  
41  
42  
43  
44

45 Using an 11-digit personal identifier, CONOR data were linked to hospitalizations and deaths  
46  
47 in the Cardiovascular Disease in Norway (CVDNOR) project, 1994-2009[24,25]. This enabled  
48  
49 us to follow CONOR participants for CVD outcomes (hospitalizations or deaths) occurring  
50  
51 after CONOR examination through December 31<sup>st</sup> 2009.  
52  
53  
54

55 We included participants aged 30-74 years old at baseline (n=3 871 excluded) to ensure  
56  
57 comparable samples between the Norwegian and New Zealand data. We excluded  
58  
59  
60

1  
2  
3 participants not born in Norway or South Asia (n=5 651 excluded), pregnant women (n=197),  
4  
5 and participants with prior CVD ((coronary heart disease (CHD), cerebrovascular disease,  
6  
7 atherosclerotic disease, transient ischemic attack (TIA) and heart failure (HF)) (n=353) or  
8  
9 atrial fibrillation (n=31) registered in the hospital data before screening.  
10  
11

### 12 13 **Outcomes**

14  
15 In both cohorts, we identified the first CVD event (non-fatal and fatal) using main or  
16  
17 secondary diagnoses from hospital discharge data or the underlying cause of death from  
18  
19 national mortality statistics. The International Classification of Diseases (ICD) codes  
20  
21 (versions 9 and/or 10) were used to define outcome variables. New Zealand hospitals used  
22  
23 an Australian modification of the ICD-10 classification called ICD10-AM[26].  
24  
25  
26

27  
28 CVD in both cohorts included the following conditions: CHD; HF; cerebrovascular disease  
29  
30 including TIA; diseases of arteries, arterioles and capillaries including atherosclerosis,  
31  
32 aneurysm and dissection as well as embolism and thrombosis. For the Norwegian cohort this  
33  
34 included the codes: ICD9: 410-414, 428, 430-438, 440, 441 except 441.7, 442, 443.9, 444;  
35  
36 ICD10:I20-I25, I50, I60-I69, I70-I79, G45. The CVD variable in the New Zealand PREDICT  
37  
38 cohort included the same ICD10 codes as just listed, and also some additional ICD10-codes  
39  
40 (I469, J81, G460-G468, Z951, Z955, Z958, Z959) plus a list of procedure codes (too many to  
41  
42 be listed here). The PREDICT CVD outcome has been described elsewhere[19].  
43  
44  
45  
46

### 47 **Ethnicity**

48  
49 Ethnicity in the New Zealand PREDICT data was based on two sources: 1) the PREDICT  
50  
51 template filled in by the GP and 2) the National Health Index dataset, both according to pre-  
52  
53 defined categories. A prioritising algorithm was used to agree on one ethnicity in case of  
54  
55 multiple ethnicities recorded (details can be found in a supplementary file entitled the VIEW  
56  
57  
58  
59  
60

1  
2  
3 Ethnicity Protocol). The system for coding ethnicity in New Zealand enables identification of  
4  
5 Indian people, who account for approximately 90% of South Asian people living in New  
6  
7 Zealand. The remaining South Asian ethnic groups are classified as part of the “Other Asian”  
8  
9 ethnic group in national health data and so could not be included here. Indian people can  
10  
11 include both immigrants and individuals who have been born in New Zealand with parents  
12  
13 (or older generations) who have immigrated. The majority of this group are immigrants since  
14  
15 76.5% of the people who identified themselves with the Indian ethnic group in New Zealand  
16  
17 in 2013 were born overseas[27].  
18  
19  
20  
21

22  
23 For the Norwegian cohort, we used country of birth merged into larger world regions to  
24  
25 define ethnicity[28]. We defined South Asians as individuals who migrated to Norway from  
26  
27 Bangladesh, Myanmar, Sri Lanka, Pakistan, India or Nepal[28]. The largest share of South  
28  
29 Asians in this dataset (95%) came from the HUBRO or the I-HUBRO study. HUBRO and I-  
30  
31 HUBRO combined included 1145 Sri Lankans and 780 Pakistanis,[29] indicating that about  
32  
33 50% of the South Asian group (n=2206) in the present study are Sri Lankans and 35% are  
34  
35 Pakistanis.  
36  
37  
38  
39

40  
41 In general, we refer to the ethnic groups as South Asians (South Asians in Norway and/or  
42  
43 Indians in New Zealand) and Europeans (ethnic Norwegians and/or New-Zealanders with  
44  
45 ethnic European origin). Most European New Zealanders are of British and Irish ancestry, of  
46  
47 whom about three quarters were born in New Zealand.  
48  
49

### 50 **Statistical analysis**

51  
52 Baseline characteristics are reported as mean values with standard deviations for continuous  
53  
54 variables and fractions for categorical variables. We tested the differences between the  
55  
56 ethnic groups adjusted for age by analysis of covariance. We used Cox regression models to  
57  
58  
59  
60

1  
2  
3 examine the prospective relationship between baseline risk factors (blood pressure, lipids,  
4 diabetes and smoking) and time until subsequent first CVD event. People were censored if  
5 they died from other causes (n=961 in PREDICT and n=276 in CONOR). Cox regression was  
6 also used to calculate hazard ratios (HRs) for CVD in South Asians versus Europeans using  
7 ethnicity as the exposure variable and adjusting for risk factors. The order we added the risk  
8 factors to the model was based on the distribution of risk factors in the subpopulations. This  
9 meant that we first introduced the risk factors that were more prevalent among South  
10 Asians compared to Europeans (diabetes and TC/HDL ratio) and then added the two less  
11 prevalent risk factors (SBP and smoking). Additional analyses where we added the risk  
12 factors in different orders and looked at each risk factor in separate models with only age as  
13 covariate did not change the conclusions (Tables A1-A2 in the Appendices). Proportional  
14 hazards assumptions were tested using scaled Schoenfeld residuals[30]. All analyses were  
15 stratified by sex and ethnicity, except for the analyses where ethnicity was the exposure  
16 variable in which we only stratified by sex. Only complete cases were included in the  
17 analyses. Stata 14 was used for analyses in the Norwegian data and Stata 11 for analysis in  
18 the New Zealand data.

19  
20  
21 To check whether the use of BP medication at baseline would impact the analyses where  
22 SBP were included, we repeated the Cox regression analyses excluding people using  
23 antihypertensive medication at baseline. Correspondingly, we also repeated the Cox-  
24 regression analyses for TC/HDL ratio without people using lipid lowering medication at  
25 baseline. In addition, since excluding those at highest risk could potentially impact the  
26 sensitivity analyses, we also adjusted for medication use without excluding anyone from the  
27 analyses (Tables A3-A4 in the Appendices).

## Ethics

The current project was approved by the Regional Committee for Medical Research Ethics, Health Region West. The PREDICT study was approved by the Northern Region Ethics Committee Y in 2003 (AKY/03/12/134), and later annually approved by the National Multi Region Ethics Committee since 2007 (MEC07/19/EXP)[19]. Each individual CONOR study was approved by the Norwegian Data Inspectorate and evaluated by the Regional Committee for Medical Research ethics[31]. Both datasets contained anonymized data.

## RESULTS

### Baseline characteristics

The final study sample from the New Zealand cohort consisted of 129 449 individuals (43% women) of European (87%) or Indian ethnicity (13%) with no history of CVD, atrial fibrillation or renal disease. Correspondingly for the Norwegian cohort, the final study sample consisted of 16 606 individuals (54% women) born in either Norway (87%) or South Asia (13%) with no history of CVD or atrial fibrillation.

At baseline, the Norwegian cohort was younger than the New Zealand cohort, and New Zealand women were older than New Zealand men (Table 1). In both cohorts, South Asians were younger than Europeans.



Table 1. Baseline characteristics (unadjusted) of the Norwegian and New Zealand participants. Participants free of prior CVD.

|                                           | <i>New Zealand cohort</i> |              |              |              |
|-------------------------------------------|---------------------------|--------------|--------------|--------------|
|                                           | Men                       |              | Women        |              |
|                                           | European                  | Indian       | European     | Indian       |
| <i>N</i>                                  | 63 319                    | 9 997        | 49 094       | 7 039        |
| Age (years)                               | 55.0 (9.3)                | 47.4 (9.7)   | 58.7 (8.7)   | 52.9 (8.5)   |
| Age range                                 | 30.0 - 74.0               | 30.0 - 74.0  | 30.0 - 74.0  | 30.0 - 74.0  |
| TC (mmol/L)                               | 5.36 (1.1)                | 5.09 (1.1)   | 5.68 (1.1)   | 5.04 (1.0)   |
| HDL cholesterol (mmol/L)                  | 1.29 (0.4)                | 1.14 (0.3)   | 1.59 (0.5)   | 1.30 (0.3)   |
| LDL cholesterol (mmol/L)                  | 3.3 (1.0)                 | 2.9 (1.0)    | 3.4 (1.1)    | 2.8 (0.9)    |
| TC/HDL ratio                              | 4.35 (1.3)                | 4.60 (1.3)   | 3.68 (1.1)   | 3.93 (1.1)   |
| SBP (mmHg)                                | 131.5 (16.3)              | 125.3 (16.1) | 131.6 (17.4) | 126.1 (17.4) |
| Diastolic blood pressure (mmHg)           | 80.5 (10.0)               | 79.1 (10.4)  | 78.8 (9.7)   | 77.4 (9.8)   |
| Hypertension <sup>†</sup> (%)             | 40                        | 34           | 44           | 39           |
| Type 2 diabetes <sup>§</sup> (%)          | 9                         | 24           | 9            | 29           |
| Former smokers (%)                        | 19                        | 6            | 16           | 1            |
| Current smokers (%)                       | 12                        | 9            | 10           | 1            |
| Family history of CVD <sup>§</sup> (%)    | 12                        | 8            | 15           | 10           |
| Antihypertensive treatment (%)            | 24                        | 26           | 30           | 32           |
| Lipid lowering treatment (%)              | 18                        | 27           | 18           | 27           |
| Follow-up time (years)                    | 2.94 (2.3)                | 2.93 (2.0)   | 2.92 (2.3)   | 2.83 (1.9)   |
|                                           | <i>Norwegian cohort</i>   |              |              |              |
|                                           | Men                       |              | Women        |              |
|                                           | Norwegian                 | South Asian  | Norwegian    | South Asian  |
| <i>N</i>                                  | 6 385                     | 1 239        | 8 015        | 967          |
| Age (years)                               | 43.7 (11.2)               | 41.4 (7.8)   | 43.9 (10.9)  | 40.3 (7.9)   |
| Age range                                 | 30.0 - 70.1               | 30.0 - 67.8  | 30.0 - 74.9  | 30.0 - 65.5  |
| TC (mmol/L)                               | 5.60 (1.1)                | 5.48 (1.0)   | 5.41 (1.0)   | 4.98 (0.9)   |
| HDL cholesterol (mmol/L)                  | 1.31 (0.3)                | 1.07 (0.2)   | 1.62 (0.4)   | 1.24 (0.3)   |
| TC/HDL ratio                              | 4.55 (1.4)                | 5.33 (1.4)   | 3.52 (1.1)   | 4.22 (1.2)   |
| SBP (mmHg)                                | 132.6 (14.4)              | 126.6 (13.2) | 124.0 (15.7) | 119.1 (15.6) |
| Diastolic blood pressure (mmHg)           | 77.6 (10.8)               | 76.9 (9.8)   | 71.5 (10.3)  | 70.0 (10.1)  |
| Hypertension <sup>†</sup> (%)             | 30                        | 22           | 19           | 16           |
| Diabetes (%)                              | 1.6                       | 8.6          | 1.4          | 10.9         |
| Former smokers (%)                        | 28                        | 16           | 26           | 2            |
| Current smokers (%)                       | 26                        | 25           | 31           | 1            |
| Family history of heart disease* (%)      | 33                        | 24           | 37           | 27           |
| Family history of stroke <sup>#</sup> (%) | 11                        | 3            | 13           | 4            |
| Antihypertensive treatment (%)            | 6                         | 8            | 6            | 9            |
| Lipid lowering treatment (%)              | 4                         | 6            | 3            | 6            |
| Follow-up time (years)                    | 8.44 (1.4)                | 7.65 (1.4)   | 8.54 (1.2)   | 7.88 (1.1)   |

Data are mean values (SD) for continuous variables and prevalence (%) for categorical variables. HDL, high density lipoprotein; LDL, low density lipoprotein; SBP, systolic blood pressure, TC, total cholesterol. <sup>†</sup>Hypertension is defined as having systolic blood pressure  $\geq 140$  mmHg or diastolic blood pressure  $\geq 90$  mmHg or using blood pressure medication. <sup>§</sup>The diabetes variable in the New Zealand data includes people with diabetes of unknown type (5%) and type 2 diabetes (95%), while in the Norwegian data we could not differentiate between different types of diabetes. <sup>§</sup>Family history of CVD in the New Zealand data: self-reported familial history of ischemic heart disease or ischemic stroke occurring in a father or brother <55 years of age, or a mother or sister <65 years of age. \*Parents or siblings have had heart attack or angina pectoris (self-report). <sup>#</sup>Parents or siblings have had stroke (self-report).

1  
2  
3 South Asians had lower levels of TC and HDL and higher mean levels of TC/HDL ratios than  
4  
5 Europeans in both Norway and New Zealand. South Asians also had the lowest SBP levels  
6  
7 (Table 1). These differences persisted after adjustment for age ( $p < 0.05$  for differences  
8  
9 between ethnic groups – results not shown).  
10

11  
12  
13 The diabetes baseline prevalence was higher among South Asians compared to Europeans in  
14  
15 both cohorts (Table 1). The difference in diabetes were the same after adjustment for age  
16  
17 ( $p < 0.001$ ). Antihypertensive and lipid lowering treatments were generally more prevalent  
18  
19 among South Asians than Europeans, and more prevalent in the New Zealand cohort  
20  
21 compared to the Norwegian cohort. Cigarette smoking was more common among  
22  
23 Europeans than South Asians, and practically none of the South Asian women smoked.  
24  
25 Mean follow up time was significantly longer in the Norwegian cohort than in the New  
26  
27 Zealand cohort (Table 1).  
28  
29  
30  
31

### 32 **CVD events**

33  
34 During follow-up, we observed 2 654 CVD events among 129 446 individuals in the New  
35  
36 Zealand cohort (378 874 person-years) and 743 new CVD events among the 16 606  
37  
38 individuals in the Norwegian cohort (139 470 person-years). The overall crude rates were  
39  
40 700 per 100 000 person-years in the New Zealand cohort and 533 per 100 000 person-years  
41  
42 in the Norwegian cohort. Ethnic specific rates for men and women in the two cohorts are  
43  
44 shown in table 2 and in the Appendices (Tables A5-A8). Also crude rates and age-adjusted  
45  
46 HRs of CVD by risk factors, ethnic groups, cohort and gender can be found in the same tables  
47  
48 in the Appendices.  
49  
50  
51  
52  
53  
54  
55  
56  
57  
58  
59  
60

### Prospective associations between risk factors and CVD

Increasing age was significantly associated with risk of CVD in both ethnic groups in both cohorts (Table 2). The age effect was very similar within the countries for both ethnic groups and gender, but was stronger in the Norwegian cohort compared to the New Zealand cohort. After adjustment for age, the traditional CVD risk factors were positively associated with CVD in both ethnic groups, across gender and country. Whereas all the risk factor-CVD event associations were statistically significant in Europeans, the 95% CIs were wider and the results not always statistically significant among South Asians. The relationship between SBP, TC/HDL ratio, smoking and subsequent CVD appeared to be weaker in Indian men compared to European men in the New Zealand cohort. The prospective association between the risk factors and CVD changed little after adjusting for the other risk factors in addition to age (results not shown). In the sensitivity analyses where we either adjusted for medication use (Table A3 in the Appendices) or excluded people using BP- and lipid lowering medication at baseline (results not shown), the estimates for the prospective associations between risk factors and CVD were similar as in the main analyses. However, for women in the New Zealand cohort, after excluding people on lipid-lowering medication, the HR for TC/HDL ratio changed to 1.12; 95% CI 0.91-1.39 for Indian women and to 1.20; 95% CI 1.12-1.27 for European women.

Table 2. Age-adjusted hazard ratios for first CVD event after baseline for selected risk factors in men and women aged 30-74 years with no history of CVD, stratified by cohort, ethnicity and gender.

| MEN                       |                         |                                          |                              |                              |                              |                                       |                                 |                                        |
|---------------------------|-------------------------|------------------------------------------|------------------------------|------------------------------|------------------------------|---------------------------------------|---------------------------------|----------------------------------------|
|                           | N events/N <sup>‡</sup> | Crude rate/100 000 person-years (95% CI) | Age (one year)<br>HR (95%CI) | SBP (10 mm/Hg)<br>HR (95%CI) | DBP (10 mm/Hg)<br>HR (95%CI) | TC/HDL ratio (one unit)<br>HR (95%CI) | Diabetes (yes/no)<br>HR (95%CI) | Current smoking (yes/no)<br>HR (95%CI) |
| <i>New Zealand cohort</i> |                         |                                          |                              |                              |                              |                                       |                                 |                                        |
| European men              | 1518/63316              | 815 (775-857)                            | 1.07 (1.06-1.07)             | 1.15 (1.12-1.18)             | 1.16 (1.10-1.22)             | 1.20 (1.16-1.23)                      | 1.92 (1.68-2.19)                | 2.29 (2.02-2.59)                       |
| Indian men                | 273/9997                | 933 (828-1050)                           | 1.06 (1.05-1.07)             | 1.05 (0.98-1.13)             | 1.02 (0.91-1.14)             | 1.08 (0.98-1.19)                      | 1.72 (1.34-2.20)                | 1.45 (0.99-2.11)                       |
| <i>Norwegian cohort</i>   |                         |                                          |                              |                              |                              |                                       |                                 |                                        |
| Norwegian men             | 379/6385                | 703 (636-778)                            | 1.10 (1.09-1.11)             | 1.15 (1.08-1.22)             | 1.19 (1.08-1.30)             | 1.22 (1.15-1.30)                      | 3.15 (2.14-4.65)                | 1.86 (1.51-2.29)                       |
| South Asian men           | 79/1239                 | 833 (668-1039)                           | 1.11 (1.08-1.14)             | 1.17 (1.01-1.35)             | 1.21 (0.97-1.51)             | 1.23 (1.05-1.42)                      | 1.61 (0.90-2.86)                | 1.43 (0.88-2.30)                       |
| WOMEN                     |                         |                                          |                              |                              |                              |                                       |                                 |                                        |
|                           | N events/N <sup>‡</sup> | Crude rate/100 000 person-years (95% CI) | Age (one year)<br>HR (95%CI) | SBP(10 mm/Hg)<br>HR (95%CI)  | DBP (10 mm/Hg)<br>HR (95%CI) | TC/HDL ratio (one unit)<br>HR (95%CI) | Diabetes (yes/no)<br>HR (95%CI) | Current smoking (yes/no)<br>HR (95%CI) |
| <i>New Zealand cohort</i> |                         |                                          |                              |                              |                              |                                       |                                 |                                        |
| European women            | 757/49094               | 528 (492-567)                            | 1.06 (1.05-1.07)             | 1.09 (1.05-1.13)             | 1.13 (1.05-1.22)             | 1.14 (1.09-1.21)                      | 1.93 (1.59-2.35)                | 2.74 (2.30-3.27)                       |
| Indian women              | 106/7039                | 531 (439-643)                            | 1.06 (1.03-1.08)             | 1.27 (1.16-1.39)             | 1.25 (1.03-1.50)             | 1.21 (1.03-1.41)                      | 2.29 (1.55-3.37)                | 2.60 (0.64-10.59)                      |
| <i>Norwegian cohort</i>   |                         |                                          |                              |                              |                              |                                       |                                 |                                        |
| Norwegian women           | 259/8015                | 378 (335-427)                            | 1.10 (1.09-1.12)             | 1.20 (1.12-1.28)             | 1.32 (1.18-1.47)             | 1.30 (1.19-1.43)                      | 2.79 (1.52-5.11)                | 2.22 (1.73-2.84)                       |
| South Asian women         | 26/967                  | 341 (232-501)                            | 1.14 (1.09-1.19)             | 1.06 (0.86-1.30)             | 1.07 (0.74-1.55)             | 1.04 (0.77-1.39)                      | 2.74 (1.21-6.22)                | †                                      |

<sup>‡</sup>The numbers of events and people included in the analyses may differ due to missing risk factor data. Few were missing in the NZ cohort. <sup>†</sup> Not calculated due to no exposed cases.

DBP, diastolic blood pressure; HDL, high density lipoprotein; SBP, systolic blood pressure; TC, total cholesterol.

### Ethnic difference in CVD

South Asians of both genders in Norway and New Zealand had increased risk of CVD compared to the European majority populations (Table 3), with age-adjusted HRs ranging from 1.42-1.92. After adjustment for TC/HDL ratio and diabetes, the HRs for South Asians versus Europeans were reduced and no longer significant in women. Additional adjustments for SBP and smoking increased the hazard ratios again so that South Asians in both countries had significantly increased risk of CVD compared to Europeans. After adjustment for age, TC/HDL ratio, diabetes, SBP and smoking, the HRs for the excess risk in South Asians compared to Europeans varied from 1.39-1.76. The largest reduction in risk estimate after

full adjustment was seen in South Asian men in the Norwegian cohort where the HR was lowered by approximately 38% after adjusting for the four major risk factors. The smallest reduction in risk estimate after adjustment was among South Asian women in the New Zealand cohort where the risk estimate was only reduced by 7 % (from 1.42 – 1.39).

Table 3. Hazard ratios (95% CI) for first CVD event in South Asian groups compared to ethnic European groups in New Zealand and Norway.

|                                           | Men                    |                             | Women                     |                             |
|-------------------------------------------|------------------------|-----------------------------|---------------------------|-----------------------------|
|                                           | Indian vs. European NZ | South Asians vs. Norwegians | Indian NZ vs. European NZ | South Asians vs. Norwegians |
| <i>N events/N</i>                         | 1791/73308             | 436/7387                    | 863/56126                 | 264/8558                    |
| <i>Adjusted for</i>                       |                        |                             |                           |                             |
| Age                                       | 1.75 (1.53-2.00)       | 1.92 (1.48-2.49)            | 1.42 (1.16-1.75)          | 1.87 (1.21-2.87)            |
| Age, TC/HDL ratio                         | 1.77 (1.55-2.02)       | 1.66 (1.27-2.16)            | 1.41 (1.14-1.73)          | 1.52 (0.98-2.36)            |
| Age, TC/HDL ratio, diabetes               | 1.49 (1.30-1.71)       | 1.42 (1.08-1.87)            | 1.15 (0.92-1.42)          | 1.30 (0.82-2.04)            |
| Age, TC/HDL ratio, diabetes, SBP          | 1.57 (1.37-1.80)       | 1.53 (1.16-2.01)            | 1.19 (0.96-1.47)          | 1.31 (0.83-2.07)            |
| Age, TC/HDL ratio, diabetes, SBP, smoking | 1.64 (1.43-1.88)       | 1.57 (1.19-2.07)            | 1.39 (1.11-1.73)          | 1.76 (1.09-2.82)            |

HDL, high density lipoprotein; NZ, New Zealand; SBP, systolic blood pressure; TC, Total cholesterol.

All had complete information on the risk factors

Additional analyses showed that the excess risk in South Asians was particularly high for CHD. The full-adjusted HRs for CHD (corresponding to the analyses in the last row of Table 3) were 2.07; 95% CI 1.76-2.44 in South Asian men and 1.60; 95% CI 1.20-2.13 in South Asian women in New Zealand. In the Norwegian cohort, the full-adjusted HRs for CHD were 1.86; 95% CI 1.36-2.55 in South Asian men and 2.84; 95% CI 1.61-5.03 in South Asian women (Table A9 in the Appendices). In the sensitivity analyses for table 3 where we excluded people using BP- or lipid lowering medication at baseline (results not shown) or adjusted for BP- or lipid lowering medication (Table A4 in the Appendices), the patterns according to the risk factor adjustments remained the same as in the main analysis.

## DISCUSSION

This study confirmed that the traditional risk factors SBP, TC/HDL ratio, diabetes and smoking are all positively associated with risk of CVD in South Asians as well as in Europeans. The present study also confirmed that South Asians had an increased risk of CVD compared to Europeans and that ethnic differences in the distribution of TC/HDL ratio and type 2 diabetes appear to explain some of this excess risk.

The main strengths of this study are the prospective study design, and inclusion of data from two countries. Unfortunately, we lacked information about duration of stay for the immigrants and the ethnic groups that we studied are heterogeneous.

Strengths of the PREDICT cohort are the large sample size and the completeness of risk factors included in the risk-assessment. Only 0.01% were missing on any of the four major risk factors because they were part of the prediction algorithm and thereby compulsory to fill in to the PREDICT template. Furthermore, comprehensive national health registers were used to identify and exclude people with prior CVD and to determine cardiovascular outcomes. In the New Zealand cohort, some recruitment bias is likely since risk assessment was initially prioritized for high-risk patients. Indian patients are therefore over-represented in the cohort together with Maoris and Pacifics[19]. The representativeness of the source population is, however, improving as PREDICTs coverage increases. In this study, follow-up extended to 2012 when PREDICT included 50% of guideline-eligible patients in the practices where the PREDICT software is used[32]. We did not assume that the cohorts were representative of the general populations in the two countries, but that the ethnic groups within the two cohorts should be comparable. Adjusting for age was therefore particularly

1  
2  
3 important in the New Zealand cohort since South Asians were around seven years younger  
4  
5 than Europeans. Results from the two cohorts showed approximately the same regarding  
6  
7 ethnic differences, which is a strength concerning the external validity of these results. A  
8  
9 limitation in the New Zealand data is short follow-up time restricting the statistical power.  
10  
11 Another limitation is the lack of standardized BP measurements since recorded BP can easily  
12  
13 be affected by a range of factors including the type of device used[33].  
14  
15

16  
17  
18 Strengths of CONOR data are the standardized measurements of risk factors, the linkage  
19  
20 with disease outcomes from comprehensive national health registers and the standardized  
21  
22 way of defining ethnicity using country of birth. A validation study examining the Oslo Health  
23  
24 study, showed that participants with a non-western background had a lower participation  
25  
26 rate than others[34]. This may reflect self-selection which can work both ways; healthy and  
27  
28 resourceful people have the energy and motivation to participate or less healthy people who  
29  
30 think their health could benefit from participating do so. Self-selection is unlikely to  
31  
32 influence associations between risk factors and subsequent disease, but could influence the  
33  
34 ethnic comparisons if the mechanisms were systematically different for the ethnic groups.  
35  
36  
37 The South Asian group in the Norwegian cohort was relatively small, which reduced the  
38  
39 precision of the estimates and limited the statistical power. Another limitation in the CONOR  
40  
41 data is missing information on some of the risk factors (see Tables A3-A6 in the Appendices  
42  
43 for numbers of missing). However, the extent of missing was small. The risk factor with most  
44  
45 missing in CONOR was diabetes (3% for the total cohort).  
46  
47  
48  
49

50  
51 In both cohorts, the endpoints are based on register data, including both hospital and  
52  
53 mortality data, which enables almost complete ascertainment of CVD events. In New  
54  
55 Zealand, more than 95% of patients with an acute CVD event are managed by government-  
56  
57  
58  
59  
60

1  
2  
3 funded health services[19]. However, CVD events occurring among participants who  
4  
5 travelled outside of New Zealand, those who emigrated after the index CVD risk assessment  
6  
7 or among participants treated in private hospitals would not be captured in the national  
8  
9 hospital and mortality registers[19]. We have no information about possible emigration for  
10  
11 the New Zealand cohort, but for the Norwegian cohort we know that few people have  
12  
13 emigrated (about 1% of the ethnic Norwegians and <3% of the South Asians who  
14  
15 participated in the Oslo health studies had emigrated by the end of follow-up). A limitation  
16  
17 for both cohorts is also the lack of medication data during follow-up. However, adjustment  
18  
19 for baseline medication did not change the estimates (Tables A3-A4 in the Appendices), and  
20  
21 Table 1 shows that South Asians used more antihypertensives and lipid lowering drugs at  
22  
23 baseline than Europeans. Both countries have universal health care and South Asians should  
24  
25 have the same access to cardiovascular medication as Europeans. It is therefore not likely  
26  
27 that lack of treatment explains the differences in risk of CVD between the two ethnic groups.  
28  
29  
30  
31  
32  
33  
34 Our finding that the traditional major CVD risk factors contribute to the development of CVD  
35  
36 in South Asians as in Europeans was an expected, yet important, finding since most  
37  
38 knowledge about CVD prevention is based on studies in populations of European descent,  
39  
40 and some have questioned whether these risk factors apply worldwide[11, 35]. This finding  
41  
42 is in line with the large INTERHEART and INTERSTROKE case-control studies[11, 12], which  
43  
44 reported that 90% of the population attributable risk for AMI and stroke worldwide was  
45  
46 accounted for by respectively nine and ten (similar) risk factors, including those included in  
47  
48 the present study. We are only aware of two other prospective studies reporting HRs for the  
49  
50 prospective relationship between major CVD risk factors and subsequent CVD in South  
51  
52 Asians[7, 36]. One of these studies included only men,[7] and the other showed estimates  
53  
54 for men and women combined and did not include blood lipids[36]. These studies generally  
55  
56  
57  
58  
59  
60



1  
2  
3 agree with our findings that traditional risk factors contribute to the development of CVD in  
4  
5 South Asians as in Europeans[7, 36]. Also, consistent with previous reports[5, 6], we found  
6  
7 that South Asians in both Norway and New Zealand have a higher risk of CVD compared to  
8  
9 the European majority populations. By including all the measured risk factors (BP, TC/HDL  
10  
11 ratio, diabetes and smoking) as adjustment variables in one statistical model, we could not  
12  
13 explain the higher risk of CVD in South Asians. However, the increased risk was attenuated  
14  
15 when we only included the risk factors more prevalent in South Asians than in Europeans  
16  
17 (TC/HDL ratio and diabetes).  
18  
19  
20

21  
22 The excess risk of CVD among South Asians compared to Europeans in the Norwegian cohort  
23  
24 was almost two-fold. This is comparable to what we reported previously when studying the  
25  
26 total Norwegian population[5]. The South Asians in the New Zealand cohort had 42-75%  
27  
28 higher risk of CVD compared to European New Zealanders which also agrees with previous  
29  
30 New Zealand studies [6]. In both the Norwegian and New Zealand data, South Asians had  
31  
32 higher baseline levels of dyslipidemia indicated by the TC/HDL ratio and higher diabetes  
33  
34 prevalence compared to the European majority populations, which is in general agreement  
35  
36 with previous knowledge from these countries[14-16]. Attenuation of the excess risk in  
37  
38 South Asians versus Europeans was best achieved in the Cox model only including diabetes  
39  
40 and TC/HDL ratio as covariates in addition to age. The same was found in both cohorts,  
41  
42 clearly indicating that the unfavorable distribution of blood lipids and type 2 diabetes  
43  
44 explains some of the higher risk of CVD in South Asians. South Asians generally have a high  
45  
46 prevalence of metabolic risk factors related to insulin resistance, often clustered so that they  
47  
48 match the concept of the metabolic syndrome[37-40]. A British cohort study that tested  
49  
50 whether traditional risk factors could account for the high mortality of CHD among South  
51  
52 Asian men compared to European men, reported that adjusting for insulin resistance,  
53  
54  
55  
56  
57  
58  
59  
60

1  
2  
3 dyslipidemia and hyperglycemia in South Asians did not explain their higher risk[7].

4  
5 However, they also adjusted for smoking and total cholesterol, which were both less  
6  
7 prevalent/lower among South Asian men compared to European men.  
8  
9

10 It is unclear why the traditional risk factors do not completely explain the excess risk of CVD  
11  
12 in South Asians. This could be related to incomplete adjustments; due to either imprecise  
13  
14 measurement of risk factors or that other important risk factors were not included (e.g.  
15  
16 waist measurement, length of time since diabetes diagnosis). A number of non-conventional  
17  
18 risk factors are also thought to partially account for the high risk of CVD in South Asians,  
19  
20 including dysfunctional HDL, C-Reactive Protein, thrombogenic risk factors, telomere length,  
21  
22 high homocysteine levels and low birth weight[41, 42]. Socioeconomic factors could  
23  
24 probably also explain some of the differences in risk between the ethnic groups, but we did  
25  
26 not have such variables. Another possibility is that risk factors work cumulatively over time  
27  
28 in the development of atherosclerosis, and some risk factors may also work at specific and  
29  
30 crucial time points during the life course. Measurements taken on single occasions may also  
31  
32 lead to an underestimation of the strength between the *usual* levels of the risk factors and  
33  
34 later disease, known as the regression dilution bias[43]. Consequently, it is unlikely that the  
35  
36 ethnic differences would disappear completely by adjusting for selected risk factors  
37  
38 measured once in midlife.  
39  
40  
41  
42  
43  
44  
45

46 Although South Asians seem to have an underlying susceptibility for metabolic diseases,  
47  
48 traditional and modifiable risk factors are important for preventing disease. Our analyses  
49  
50 indicate that it is important to focus on the prevention of type 2 diabetes and dyslipidaemia  
51  
52 when aiming to reduce the burden of CVD among South Asians. The additional effect of  
53  
54 abdominal obesity for the risk of CVD among South Asians in Norway and New Zealand has,  
55  
56  
57  
58  
59  
60

1  
2  
3 however, not yet been studied although we know that the prevalence is high in this ethnic  
4  
5 group[38, 44]. In both Norway[45, 46] and New Zealand,[47] intervention studies targeting  
6  
7 immigrants from South Asia have been carried out with some promising results. A UK-study  
8  
9 that prospectively examined the influence from four health behaviors on the risk of CVD in  
10  
11 South Asian immigrants and UK Europeans found an important potential for disease  
12  
13 prevention among South Asians if they adhered to healthy behaviors[8].  
14  
15  
16  
17  
18  
19

## 20 **CONCLUSION**

21  
22 Ethnic differences in distribution of TC/HDL ratio and type 2 diabetes explained some, but  
23  
24 not all, the excess risk of CVD in South Asians compared to Europeans in Norway and New  
25  
26 Zealand. Smoking and elevated BP were less prevalent among South Asians and thus could  
27  
28 not explain any of the observed differences in risk of CVD. Targeted diabetes and  
29  
30 dyslipidaemia management among South Asians, including support for healthy lifestyle  
31  
32 choices, should be a priority if the high burden of CVD in these ethnic populations is to be  
33  
34 reduced.  
35  
36  
37  
38  
39  
40  
41  
42

## 43 **Acknowledgements**

44  
45 The authors thank Tomislav Dimoski at the Norwegian Knowledge Centre for Health Services,  
46  
47 Oslo, Norway for his contribution by developing software necessary for obtaining data from  
48  
49 Norwegian hospitals, conducting the data collection and quality assurance of data in this  
50  
51 project. We also wish to thank Dr. Geeta Gala and Dr Roshini Peiris-John, members of the  
52  
53 South Asian governance group for the University of Auckland VIEW research team, for  
54  
55 reviewing the paper and giving us their feedback.  
56  
57  
58  
59  
60

1  
2  
3 **Competing interests:** All authors have completed the ICMJE uniform disclosure form at  
4  
5 [www.icmje.org/coi\\_disclosure.pdf](http://www.icmje.org/coi_disclosure.pdf). Dr. Jackson and Dr. Mehta both report grants from  
6  
7 Health Research Council of New Zealand. All other co-authors declare to have no competing  
8  
9 interests.  
10

11  
12  
13 **Funding:** This work was supported by the Norwegian Extra-Foundation for Health and  
14  
15 Rehabilitation (grant number 2012-2-0129).  
16

17  
18 **Contributors:** HEM, RJ and GST contributed to the conception and design of the work. RJ, BK,  
19  
20 AKJ and GST contributed to the collection of data. JI, RP and SM contributed to data  
21  
22 preparations and definition of endpoints. KRS drafted the paper and carried out the data  
23  
24 analyses. All authors contributed to the interpretation of data as well as critical reading and  
25  
26 revision of the draft.  
27  
28

29  
30  
31 **Data sharing statement:** No additional data are available.  
32  
33  
34  
35  
36  
37  
38  
39  
40  
41  
42  
43  
44  
45  
46  
47  
48  
49  
50  
51  
52  
53  
54  
55  
56  
57  
58  
59  
60

## REFERENCES

1. Zaman MJ, Bhopal RS. New answers to three questions on the epidemic of coronary mortality in south Asians: incidence or case fatality? Biology or environment? Will the next generation be affected? *Heart* 2013;99(3):154-8.
2. Bo A, Zinckernagel L, Krasnik A et al. Coronary heart disease incidence among non-Western immigrants compared to Danish-born people: effect of country of birth, migrant status, and income. *Eur J Prev Cardiol* 2015;22(10):1281-9
3. Hedlund E, Lange A, Hammar N. Acute myocardial infarction incidence in immigrants to Sweden. Country of birth, time since immigration, and time trends over 20 years. *Eur J Epidemiol* 2007;22(8):493-503.
4. Tillin T, Hughes AD, Mayet J, et al. The Relationship Between Metabolic Risk Factors and Incident Cardiovascular Disease in Europeans, South Asians, and African Caribbeans: SABRE (Southall and Brent Revisited)—A Prospective Population-Based Study. *J Am Coll Cardiol*. 2013;61(17):1777-1786.
5. Rabanal KS, Selmer RM, Iglund J et al. Ethnic inequalities in acute myocardial infarction and stroke rates in Norway 1994-2009: a nationwide cohort study (CVDNOR). *BMC Public Health* 2015;15:1073.
6. Ministry of Health, *Asian Health Chart Book 2006*. 2006: Wellington: Ministry of Health
7. Forouhi N, Sattar N, Tillin T et al. Do known risk factors explain the higher coronary heart disease mortality in South Asian compared with European men? Prospective follow-up of the Southall and Brent studies, UK. *Diabetologia*, 2006;49(11):2580-2588.
8. Eriksen A, Tillin T, O'Connor L et al. The impact of health behaviours on incident cardiovascular disease in Europeans and South Asians—a prospective analysis in the UK SABRE study. *PLoS one*, 2015;1:15.
9. de Munter JS, Agyemang C, Stronks K et al, Association of physical activity, smoking, and alcohol intake with CVD-related hospital discharge in people of European, South Asian, or African descent. *Eur J Prev Cardiol* 2013;20(1):80-8.
10. Ranganathan M and Bhopal R. Exclusion and inclusion of nonwhite ethnic minority groups in 72 North American and European cardiovascular cohort studies. *PLoS medicine*, 2006;3(3):e44.
11. Yusuf S, Hawken S, Ounpuu S et al. Effect of potentially modifiable risk factors associated with myocardial infarction in 52 countries (the INTERHEART study): case-control study. *Lancet* 2004;364(9438):937-52.
12. O'Donnell MJ, Xavier D, Liu L et al. Risk factors for ischaemic and intracerebral haemorrhagic stroke in 22 countries (the INTERSTROKE study): a case-control study. *Lancet* 2010;376(9735):112-23.
13. Joshi P, Islam S, Pais P et al, Risk factors for early myocardial infarction in South Asians compared with individuals in other countries. *Jama* 2007;297(3):286-94
14. Perumal L, Wells S, Ameratunga S et al. Markedly different clustering of CVD risk factors in New Zealand Indian and European people but similar risk scores (PREDICT-14). *Aust N Z J Public Health* 2012;36(2):141-4.
15. Jenum A, Diep LM, Holmboe-Ottesen G et al. Diabetes susceptibility in ethnic minority groups from Turkey, Vietnam, Sri Lanka and Pakistan compared with Norwegians - the association with adiposity is strongest for ethnic minority women. *BMC Public Health* 2012;12(1):150.
16. Rabanal KS, Lindman AS, Selmer RM et al. Ethnic differences in risk factors and total risk of cardiovascular disease based on the Norwegian CONOR study. *Eur J Prev Cardiol* 2013;20(6):1013-1021.
17. Kumar B, Selmer R, Lindman AS et al. Ethnic differences in SCORE cardiovascular risk in Oslo, Norway. *Eur J Cardiovasc Prev Rehabil* 2009;16:229 - 234.

- 1
  - 2
  - 3
  - 4
  - 5
  - 6
  - 7
  - 8
  - 9
  - 10
  - 11
  - 12
  - 13
  - 14
  - 15
  - 16
  - 17
  - 18
  - 19
  - 20
  - 21
  - 22
  - 23
  - 24
  - 25
  - 26
  - 27
  - 28
  - 29
  - 30
  - 31
  - 32
  - 33
  - 34
  - 35
  - 36
  - 37
  - 38
  - 39
  - 40
  - 41
  - 42
  - 43
  - 44
  - 45
  - 46
  - 47
  - 48
  - 49
  - 50
  - 51
  - 52
  - 53
  - 54
  - 55
  - 56
  - 57
  - 58
  - 59
  - 60
18. Bannink L, Wells S, Broad J et al. Web-based assessment of cardiovascular disease risk in routine primary care practice in New Zealand: the first 18,000 patients (PREDICT CVD-1). *N Z Med J* 2006; 119(1245):U2313.
19. Wells S, Riddell T, Kerr A et al. Cohort Profile: The PREDICT Cardiovascular Disease Cohort in New Zealand Primary Care (PREDICT-CVD 19). *Int J Epidemiol* 2015:dyv312.
20. Statistics New Zealand. Subnational population estimates tables. Wellington: Statistics New Zealand. 2014.
21. New Zealand Guideline Group. The assessment and Management of Cardiovascular Risk. 2003: Wellington, New Zealand
22. Anderson KM, Odell PM, Wilson PW et al. Cardiovascular disease risk profiles. *Am Heart J* 1991;121(1):293-298.
23. Næss Ø, Sjøgaard AJ, Arnese et al. Cohort Profile: Cohort of Norway (CONOR). *Int J Epidemiol* 2008; 37(3):481-485.
24. Sulo G, Igland J, Vollset SE et al. Cardiovascular disease and diabetes mellitus in Norway during 1994-2009 CVDNOR - a nationwide research project. *Norsk epidemiologi* 2013;23(1).
25. Sulo G, Igland J, Nygård O et al. Favourable trends in incidence of AMI in Norway during 2001-2009 do not include younger adults: a CVDNOR project. *Eur J Prev Cardiol* 2014;21.11:1358-64.
26. Ministry of Health. ICD-10-AM/ACHI/ACS. Wellington: Ministry of Health. September 25 2015]; Available from: <http://www.health.govt.nz/nz-health-statistics/classification-and-terminology/icd-10-am-achi-acs>.
27. Statistics New Zealand. Tatauranga Aotearoa. 2013 Census. Ethnic group profile: Indian. Retrived 11.09.2015 from: [http://www.stats.govt.nz/Census/2013-census/profile-and-summary-reports/ethnic-profiles.aspx?request\\_value=24743&parent\\_id=24726&tabname=#2013](http://www.stats.govt.nz/Census/2013-census/profile-and-summary-reports/ethnic-profiles.aspx?request_value=24743&parent_id=24726&tabname=#2013).
28. Norwegian Institute of Public Health. Documentation of the CONOR file. Version 02.07.2012. 14.12.2016]; Available from: <https://www.fhi.no/globalassets/migrering/dokumenter/pdf/documentation-of-the-conor-file.pdf>
29. Kumar B, Grøtvedt L, Meyer H et al. The Oslo immigrant health profile, in Rapport 2008:7. Oslo: Norwegian Institute of Public Health 2008.
30. Schoenfeld D. Partial residuals for the proportional hazards regression model. *Biometrika*. 1982;69(1)239-41.
31. Sogaard A. Cohort Norway (CONOR): Materials and methods: Norwegian Institute of Public Health; 2007. Available from: <http://www.fhi.no/studier/cohort-of-norway>.
32. Ministry of Health. How is my PHO performing? 2014/15 Quarter 3 (January to March) results. Wellington: Ministry of Health 2015 [February 5 2015]. Available from: <http://www.health.govt.nz/new-zealand-health-system/health-targets/how-my-pho-performing>.
33. Tolonen H, Koponen P, Naska A et al. Challenges in standardization of blood pressure measurement at the population level. *BMC Med Res Methodol* 2015;15:33.
34. Sogaard A, Selmer R, Bjertness E et al. The Oslo Health Study: The impact of self-selection in a large population-based survey. *Int J Equity Health*. 2004;3(3):1-12.
35. Pais P, Pogue J, Gerstein H et al. Risk factors for acute myocardial infarction in Indians: a case-control study. *Lancet*. 1996;348(9024):358-63.
36. Williams ED, Stamatakis E, Chandola T et al. Physical activity behaviour and coronary heart disease mortality among South Asian people in the UK: an observational longitudinal study. *Heart*. 2011;97(8):655-9.
37. Alberti KG, Eckel RH, Grundy SM, Zimmet PZ, Cleeman JI, Donato KA, et al. Harmonizing the metabolic syndrome: a joint interim statement of the International Diabetes Federation Task Force on Epidemiology and Prevention; National Heart, Lung, and Blood Institute; American

- 1  
2  
3 Heart Association; World Heart Federation; International Atherosclerosis Society; and  
4 International Association for the Study of Obesity. *Circulation*. 2009;120(16):1640-5.  
5 38. Misra A and Khurana L. The metabolic syndrome in South Asians: epidemiology,  
6 determinants, and prevention. *Metab Syndr Relat Disord* 2009;7(6):497-514.  
7 39. McKeigue P, Shah B, Marmot M. Relation of central obesity and insulin resistance with high  
8 diabetes prevalence and cardiovascular risk in South Asians. *Lancet*. 1991;337(8738):382-6..  
9 40. Hjellset VT, Bjorge B, Eriksen HR et al, Risk factors for type 2 diabetes among female Pakistani  
10 immigrants: the InvaDiab-DEPLAN study on Pakistani immigrant women living in Oslo,  
11 Norway. *J Immigr Minor Health*, 2011;13(1):101-10.  
12 41. Ahmed E, El-Menyar A. South Asian Ethnicity and Cardiovascular Risk The Known, the  
13 Unknown, and the Paradox. *Angiology* 2015;66(5):405-15.  
14 42. Nair M, Prabhakaran D. Why Do South Asians Have High Risk for CAD? *Glob Heart*.  
15 2012;7(4):307-14.  
16 43. MacMahon S, Peto R, Cutler J et al. Blood pressure, stroke, and coronary heart disease. Part  
17 1, Prolonged differences in blood pressure: prospective observational studies corrected for  
18 the regression dilution bias. *Lancet*. 1990;335(8692):765-74.  
19 44. Kumar B, Meyer H, Wandel M et al. Ethnic differences in obesity among immigrants from  
20 developing countries, in Oslo, Norway. *Int J Obes*. 2006;30:684-90.  
21 45. Telle-Hjellset V, Raberg Kjollesdal MK, Bjorge B et al. The InnvaDiab-DE-PLAN study: a  
22 randomised controlled trial with a culturally adapted education programme improved the  
23 risk profile for type 2 diabetes in Pakistani immigrant women. *Br J Nutr*. 2013;109(3):529-38.  
24 46. Andersen E, Hostmark AT, Holme I, Anderssen SA. Intervention effects on physical activity  
25 and insulin levels in men of Pakistani origin living in Oslo: a randomised controlled trial. *J*  
26 *Immigr Minor Health*. 2013;15(1):101-10.  
27 47. Rush EC, Chandu V, Plank LD. Reduction of abdominal fat and chronic disease factors by  
28 lifestyle change in migrant Asian Indians older than 50 years. *Asia Pac J Clin Nutr*. 2007;  
29 16(4):671-676.  
30  
31  
32  
33  
34  
35  
36  
37  
38  
39  
40  
41  
42  
43  
44  
45  
46  
47  
48  
49  
50  
51  
52  
53  
54  
55  
56  
57  
58  
59  
60

## VIEW Ethnicity Protocol

Ethnicity is assigned to an individual based on a prioritisation output. The prioritisation ethnicity protocol adopted by VIEW is based on the Statistics New Zealand ethnicity prioritisation method, and is the most frequently used output method in Ministry of Health statistics. The table below shows level 2 ethnicity codes and their corresponding priority. More information on prioritised output can be found in Appendix A

Table 1

### Level 2 ethnic codes

| Ethnic Group code | Ethnic Group code description      | Ethnic Group priority | Revised VIEW priority |
|-------------------|------------------------------------|-----------------------|-----------------------|
| 10                | European not further defined       | 21                    |                       |
| 11                | NZ European                        | 22                    |                       |
| 12                | Other European                     | 20                    |                       |
| 21                | NZ Maori                           | 1                     |                       |
| 30                | Pacific Island not further defined | 9                     |                       |
| 31                | Samoan                             | 7                     |                       |
| 32                | Cook Island Maori                  | 6                     |                       |
| 33                | Tongan                             | 5                     |                       |
| 34                | Niuean                             | 4                     |                       |
| 35                | Tokelauan                          | 2                     |                       |
| 36                | Fijian                             | 3                     |                       |
| 37                | Other Pacific Island               | 8                     |                       |
| 40                | Asian not further defined          | 14                    |                       |
| 41                | Southeast Asian                    | 10                    | 12                    |
| 42                | Chinese                            | 12                    | 11                    |
| 43                | Indian                             | 11                    | 10                    |
| 44                | Other Asian                        | 13                    |                       |
| 51                | Middle Eastern                     | 17                    |                       |
| 52                | Latin American / Hispanic          | 15                    |                       |
| 53                | African                            | 16                    |                       |
| 54                | Other (retired on 1/07/2009)       | 19                    |                       |
| 61                | Other ethnicity                    | 18                    |                       |
| 94                | Don't know                         | 94                    |                       |
| 95                | Refused to answer                  | 95                    |                       |
| 97                | Response unidentifiable            | 97                    |                       |
| 99                | Not stated                         | 99                    |                       |



**PREDICT 2015 baseline data – Unique ethnicity codes**

Ethnicity data used in VIEW comes from two sources – PREDICT and Ministry of Health. When patients are enrolled into PREDICT, their ethnicity are recorded across three ethnicity inputs fields (allowing for the self-identification of up to 3 ethnicity responses). In addition, the Ministry of Health has provided us with a 2015 update of the NHI Demographic Lookup table, containing the demographic data for 7.7 million unique eNHI. Similarly, up to three ethnicity codes are provided (allowing for the self-identification of up to three ethnicity responses). In total, each patient has up to 6 codes that represent their ethnicity.

All unique responses provided from each of the ethnicity fields in the PREDICT 2015 Baseline Data

| Source                  | Variable name     | Ethnicity Codes                                                                                                       |
|-------------------------|-------------------|-----------------------------------------------------------------------------------------------------------------------|
| PREDICT 2015            | pt_ethnic_group_1 | 10 11 12 21 30 31 32 33 34 35 36 37<br>40 41 42 43 44 51 52 53 54 441 442<br>443 444 44411 44412 44413 44414 44415 NA |
|                         | pt_ethnic_group_2 | 10 11 12 21 30 31 32 33 34 35 36 37<br>40 41 42 43 44 51 52 53 54 99 441<br>443 44411 44412 44414 NA                  |
|                         | pt_ethnic_group_3 | 10 11 12 21 30 31 32 33 34 35 36 37<br>40 41 42 43 44 51 52 53 54 99 441<br>44411 44414 NA                            |
| Ministry of Health 2015 | nhi_ethnicg1      | 10 11 12 21 30 31 32 33 34 35 36 37 40<br>41 42 43 44 51 52 53 54 61 94 95 97 99                                      |
|                         | nhi_ethnicg2      | 10 11 12 21 30 31 32 33 34 35 36 37 40<br>41 42 43 44 51 52 53 54 61 94 95 97 99<br>NA                                |
|                         | nhi_ethnicg3      | 10 11 12 21 30 31 32 33 34 35 36 37 40<br>41 42 43 44 51 52 53 61 97 99 NA                                            |

NB: There are no NAs in “nhi\_ethnicg1”

### Procedure for Ethnicity Allocation

The procedure assigns one single ethnicity to each individual. The ethnicity response (there are 6 in total) of each individual is read by the programme using the prioritisation protocol. The programme checks each of the 6 ethnicity fields of a person, and determines which single ethnicity will be assigned. The programme checks each row of data and executes the following command in this order:

- 1) Is this person Maori? If yes, write "NZMaori", otherwise next question.
- 2) Is this person Pacific? If yes, write "Pacific", otherwise next question.
- 3) Is this person Indian? If yes, write "Indian", otherwise next question.
- 4) Is this person Chinese? If yes, write "Chinese", otherwise next question.
- 5) Is this person Asian? If yes, write "Asian", otherwise next question.
- 6) Is this person MELAA? If yes, write "MELAA", otherwise next question.
- 7) Is this person Other? If yes, write "Other", otherwise next question.
- 8) Is this person European? If yes, write "European", otherwise next question.
- 9) Is the ethnicity unknown, not answered, not identifiable? If yes, write "No\_not\_stated".

NB: MELAA = Middle Eastern, Latin American, African

### **VIEW REVISED** Procedure for Ethnicity Allocation

- 1) Is this person Maori? If yes, write "NZMaori", otherwise next question.
- 2) Is this person Pacific? If yes, write "Pacific", otherwise next question.
- 3) Is this person Indian? If yes, write "Indian", otherwise next question.
- 4) Is this person Chinese? If yes, write "Chinese", otherwise next question.
- 5) Is this person Asian? If yes, write "Asian", otherwise next question.
- 6) Is this person European? If yes, write "European", otherwise next question.
- 7) Is this person MELAA? If yes, write "MELAA", otherwise next question.
- 8) Is this person Other? If yes, write "Other", otherwise next question.
- 9) Is the ethnicity unknown, not answered, not identifiable? If yes, write "No\_not\_stated".

## Multiple Ethnicities

Any individuals with multiple ethnicity responses will be assigned the higher priority of ethnicity.

Example 1 – If a patient is recorded as Maori (21) and Samoan (31), then they are recorded as “Maori”. This is because the programme asks whether this person is “Maori” first. With the answer being yes, “Maori” is recorded. The programme then moves onto the next person instead of asking whether or not they are Pacific.

Example 2 – If a person is recorded as Chinese (42), Southeast Asian (41), and NZ European (11), then they are recorded as Chinese. With Chinese being the highest priority, the person is assigned “Chinese” and the programme moves onto the next person.

NB: “Asian” contains Southeast Asian (41) which has a higher priority compared to Indian and Chinese (see Table 1). However, due to its relatively small population, the Southeast Asian group will be included in the “Asian” group, and thus not prioritised over Indian or Chinese. This is the ONLY exception to the prioritisation order!

## The use of “OTHER” Ethnicity

This classification should be clearly defined. The term “Other” does in fact have its own ethnicity coding. It should not be used as a category for which miscellaneous or small populations are assigned as a matter of convenience. Previously, Middle Eastern (51), Latin American/Hispanic (52), and African (53), were frequently included in the OTHER ethnic group. Since 2009 (I think), Statistics New Zealand and the MOH have adopted a new category called MELAA which incorporates codes 51-53. A distinction between MELAA and Other is therefore created. There are two codes (and there should only be two codes), for Other Ethnicity – 54 (pre-2009) and 61 (post-2009).

### Original “ag\_eth” Classification

| Label    | Code                                                    |
|----------|---------------------------------------------------------|
| Maori    | 21                                                      |
| Pacific  | 30, 31, 32, 33, 34, 35, 36, 37                          |
| Indian   | 43, (36 & 43)                                           |
| Asian    | 40, 41, 42, 44, 441, 442, 443, 444, 44411, 44412, 44414 |
| Other    | 51, 52, 53, 54                                          |
| European | 10, 11, 12, 94, 95, 96, 99, " ", ""                     |

### Problems with above coding convention:

- “44415” is missing from Asian group
- MELAA codes (51-53) are recorded as “Other Ethnicity”
- “Other Ethnicity” code (61) missing
- European group contains residual codes (94, 95, 96, 99, " ", "")
- “Chinese” are not represented clearly

### Distribution of original “ag\_eth” (all unique individuals at baseline)

#### Frequency

| Asian | European | Indian | NZMaori | Other | Pacific | <NA> |
|-------|----------|--------|---------|-------|---------|------|
| 45308 | 276933   | 39205  | 62181   | 8907  | 59305   | 306  |

NB: There should be no NA values since `nhi_ethnicg1` contains no NAs

#### Proportion

| Asian | European | Indian | NZMaori | Other | Pacific | <NA>  |
|-------|----------|--------|---------|-------|---------|-------|
| 0.092 | 0.563    | 0.080  | 0.126   | 0.018 | 0.121   | 0.001 |

**NEW “view\_ag\_eth” Classification**

| Label         | Code                                                       |
|---------------|------------------------------------------------------------|
| Maori         | 21                                                         |
| Pacific       | 30, 31, 32, 33, 34, 35, 36, 37                             |
| Indian        | 43, (36 & 43)                                              |
| Chinese       | 42                                                         |
| Asian         | 40, 41, 44, 441, 442, 443, 444, 44411, 44412, 44414, 44415 |
| MELAA         | 51, 52, 53                                                 |
| Other         | 54, 61                                                     |
| European      | 10, 11, 12                                                 |
| No_not_stated | 94, 95, 96, 99, " ", ""                                    |

“Other” includes individuals who write “Klingon” or “Martian” as their response.

This list of ethnic groups can be combined as suited to the individual study, however the default coding for VIEW should be that “MELAA” and “Other” will be combined into “Other”. As this is a very heterogeneous group, it may be left out of analyses that focus on ethnic-specific analyses.

“No\_not\_stated” is defined rather than the default “NA”. The reason is that the MOH have codes precisely for these situation, ranging from “Don’t know” (94), “Refused to Answer” (95), to “Not Stated” (99). If you’re reporting the status of everyone in your cohort of interest, this should be stated as being missing data on ethnicity and not combined with “Other”, as they represent two different types of data.

In previous merges, the European group included “Other” and “NA”. The new coding allows European to be more clearly defined.

**Distribution of proposed new “ag\_eth2” (all unique individuals at baseline)****Frequency**

| Asian | Chinese | European | Indian | MELAA | No_not_stated | NZMaori |
|-------|---------|----------|--------|-------|---------------|---------|
| 18745 | 26563   | 276433   | 39205  | 6797  | 654           | 62181   |
| Other | Pacific | <NA>     |        |       |               |         |
| 2262  | 59305   | 0        |        |       |               |         |

**Proportion**

| Asian | Chinese | European | Indian | MELAA | No_not_stated | NZMaori |
|-------|---------|----------|--------|-------|---------------|---------|
| 0.038 | 0.054   | 0.562    | 0.080  | 0.014 | 0.001         | 0.126   |
| Other | Pacific | <NA>     |        |       |               |         |
| 0.005 | 0.121   | 0.000    |        |       |               |         |

## Appendix A

### Prioritisation Output for Ethnicity

In prioritised output, each respondent is allocated to a single ethnic group using the priority system (Māori, Pacific peoples, Asian, other groups except NZ European; and NZ European). The aim of prioritisation is to ensure that where some need exists to assign people to a single ethnic group, ethnic groups of policy importance, or of small size, are not swamped by the NZ European ethnic group.

This output type is the one most frequently used in Ministry of Health statistics and is also widely used in the health and disability sector for funding calculations, monitoring changes in the ethnic composition of service utilisation, and so on. Its advantage is that it produces data that are easy to work with as each individual appears only once so the sum of the ethnic group populations will add up to the total New Zealand population.

When ethnicity data is to be output to the Ministry of Health National Systems and more than three ethnicities are available to send, the prioritisation method described in the protocols must be used. This will ensure consistency within the national collections.

#### Limitations are that prioritised output:

- places people in specific (high priority because of policy importance) ethnic groups which simplifies yet biases the resulting statistics
- over-represents some groups at the expense of others – for example, Māori gain at the expense of Pacific peoples (approximately 31,542) and Pacific peoples gain at the expense of other groups (34,602) of which most are Pacific/European (30,018)
- goes against the principle of self-identification.

One of the main criteria stipulated in the definition of ethnicity is that a person can belong to more than one ethnic group. The ethnicity question caters for multiple responses. However, the question does not ask people to indicate the ethnic group with which they identify the most strongly; instead, prioritisation makes this choice for them. The question is to remain the same for the 2006 census so, to ensure numerator and denominator consistency (see Section 1.5), asking people to state the ethnicity with which they identify the 'most strongly' is not an option.

## Appendix

Table A1. Hazard ratios (95% CI) for first CVD event in South Asian groups compared to ethnic European groups in New Zealand and Norway- risk factors introduced in a different order than in the main analyses.

|                                                  | Men                    |                             | Women                     |                             |
|--------------------------------------------------|------------------------|-----------------------------|---------------------------|-----------------------------|
|                                                  | Indian vs. European NZ | South Asians vs. Norwegians | Indian NZ vs. European NZ | South Asians vs. Norwegians |
| <b><i>N events/N</i></b>                         | 1791/73308             | 436/7387                    | 863/56126                 | 264/8558                    |
| <b><i>Adjusted for</i></b>                       |                        |                             |                           |                             |
| <b>Age</b>                                       | 1.75 (1.53-2.00)       | 1.92 (1.48-2.49)            | 1.42 (1.16-1.75)          | 1.87 (1.21-2.87)            |
| <b>Age, diabetes</b>                             | 1.48 (1.29-1.70)       | 1.64 (1.25-2.15)            | 1.15 (0.93-1.43)          | 1.52 (0.96-2.39)            |
| <b>Age, diabetes, SBP</b>                        | 1.56 (1.36-1.79)       | 1.76 (1.34-2.31)            | 1.19 (0.96-1.48)          | 1.49 (0.94-2.36)            |
| <b>Age, diabetes, SBP, smoking</b>               | 1.63 (1.42-1.87)       | 1.78 (1.35-2.33)            | 1.39 (1.12-1.74)          | 2.00 (1.25-3.20)            |
| <b>Age, diabetes, SBP, smoking, TC/HDL ratio</b> | 1.64 (1.43-1.88)       | 1.57 (1.19-2.07)            | 1.39 (1.11-1.73)          | 1.76 (1.09-2.82)            |

Table A2. Hazard ratios (95% CI) for first CVD event in South Asian groups compared to ethnic European groups in New Zealand and Norway – adjusting for each risk factor in separate models with only age as covariate.

|                                  | Men                    |                             | Women                     |                             |
|----------------------------------|------------------------|-----------------------------|---------------------------|-----------------------------|
|                                  | Indian vs. European NZ | South Asians vs. Norwegians | Indian NZ vs. European NZ | South Asians vs. Norwegians |
| <b><i>N events/N</i></b>         | 1791/73308             | 436/7387                    | 863/56126                 | 264/8558                    |
| <b><i>Adjusted for</i></b>       |                        |                             |                           |                             |
| <b>Age only</b>                  | 1.75 (1.53-2.00)       | 1.92 (1.48-2.49)            | 1.42 (1.16-1.75)          | 1.87 (1.21-2.87)            |
| <b>Age and diabetes only</b>     | 1.48 (1.29-1.70)       | 1.64 (1.25-2.15)            | 1.15 (0.93-1.43)          | 1.52 (0.96-2.39)            |
| <b>Age and TC/HDL ratio only</b> | 1.77 (1.55-2.02)       | 1.66 (1.27-2.16)            | 1.41 (1.14-1.73)          | 1.52 (0.98-2.36)            |
| <b>Age and SBP only</b>          | 1.84 (1.61-2.10)       | 2.04 (1.57-2.65)            | 1.47 (1.20-1.82)          | 1.84 (1.20-2.82)            |
| <b>Age and smoking only</b>      | 1.84 (1.61-2.10)       | 2.46 (1.58-3.84)            | 1.67 (1.35-2.07)          | 1.94 (1.49-2.51)            |

Table A3. Age-adjusted hazard ratios for first CVD event after baseline for selected risk factors in men and women aged 30-74 years with no history of CVD, stratified by cohort, ethnicity and gender – with and without adjustment for medication at baseline.

| MEN                       | N events/N* | SBP (10 mm/Hg)   | SBP (10 mm/Hg) adjusted for BP medication | TC/HDL ratio (one unit) | TC/HDL ratio (one unit) adjusted for lipid lowering medication |
|---------------------------|-------------|------------------|-------------------------------------------|-------------------------|----------------------------------------------------------------|
| <i>New Zealand cohort</i> |             | HR (95%CI)       |                                           | HR (95%CI)              |                                                                |
| European men              | 1518/63316  | 1.15 (1.12-1.18) | 1.14 (1.11-1.17)                          | 1.20 (1.16-1.23)        | 1.20 (1.16-1.24)                                               |
| Indian men                | 273/9997    | 1.05 (0.98-1.13) | 1.03 (0.96-1.11)                          | 1.08 (0.98-1.19)        | 1.10 (1.00-1.20)                                               |
| <i>Norwegian cohort</i>   |             | HR (95%CI)       |                                           | HR (95%CI)              |                                                                |
| Norwegian men             | 379/6385    | 1.15 (1.08-1.22) | 1.13 (1.06-1.20)                          | 1.22 (1.15-1.30)        | 1.23 (1.16-1.31)                                               |
| South Asian men           | 79/1239     | 1.17 (1.01-1.35) | 1.14 (0.98-1.32)                          | 1.23 (1.05-1.42)        | 1.21 (1.04-1.42)                                               |
| WOMEN                     | N events/N* | SBP(10 mm/Hg)    | SBP (10 mm/Hg) adjusted for BP medication | TC/HDL ratio (one unit) | TC/HDL ratio (one unit) adjusted for lipid lowering medication |
| <i>New Zealand cohort</i> |             | HR (95%CI)       |                                           | HR (95%CI)              |                                                                |
| European women            | 757/49094   | 1.09 (1.05-1.13) | 1.07 (1.03-1.12)                          | 1.14 (1.09-1.21)        | 1.15 (1.09-1.21)                                               |
| Indian women              | 106/7039    | 1.27 (1.16-1.39) | 1.23 (1.12-1.36)                          | 1.21 (1.03-1.41)        | 1.22 (1.04-1.42)                                               |
| <i>Norwegian cohort</i>   |             | HR (95%CI)       |                                           | HR (95%CI)              |                                                                |
| Norwegian women           | 259/8015    | 1.20 (1.12-1.28) | 1.18 (1.11-1.26)                          | 1.30 (1.19-1.43)        | 1.33 (1.21-1.46)                                               |
| South Asian women         | 26/967      | 1.06 (0.86-1.30) | 1.06 (0.85-1.31)                          | 1.04 (0.77-1.39)        | 1.01 (0.75-1.37)                                               |

\*The numbers of events and people included in the analyses may differ due to missing risk factor data. Few were missing in the NZ cohort. SBP, systolic blood pressure; TC, total cholesterol; HDL, high density lipoprotein.

Table A4. Hazard ratios (95% CI) for first CVD event in South Asian groups compared to ethnic European groups in New Zealand and Norway – with and without adjustment for medication at baseline.

|                                                                                                                            | Men                       | Women                       |
|----------------------------------------------------------------------------------------------------------------------------|---------------------------|-----------------------------|
|                                                                                                                            | Indian vs. European NZ    | South Asians vs. Norwegians |
|                                                                                                                            | Indian NZ vs. European NZ | South Asians vs. Norwegians |
| <b>N events/N</b>                                                                                                          | 1791/73308                | 436/7387                    |
| <b>Adjusted for</b>                                                                                                        |                           |                             |
| <b>Age, TC/HDL ratio, diabetes, SBP, smoking</b>                                                                           | 1.64 (1.43-1.88)          | 1.57 (1.19-2.07)            |
| <b>Age, TC/HDL ratio, diabetes, SBP, smoking + medication use at baseline (antihypertensives and lipid lowering drugs)</b> | 1.62 (1.41-1.86)          | 1.53 (1.16-2.03)            |

HDL, high density lipoprotein; NZ, New Zealand; SBP, systolic blood pressure; TC, Total cholesterol. All had complete information on the risk factors



Table A5. Crude rates and age-adjusted HR of CVD by risk factors, Norwegian and South Asian men from the Norwegian cohort.

|                              | Norwegian      |                   |                                          |                  | South Asian    |                   |                                          |                  |
|------------------------------|----------------|-------------------|------------------------------------------|------------------|----------------|-------------------|------------------------------------------|------------------|
|                              | No. of persons | No. of CVD events | Crude rate/100 000 person-years (95% CI) | HR (95% CI)      | No. of persons | No. of CVD events | Crude rate/100 000 person-years (95% CI) | HR (95% CI)      |
| <b>Total</b>                 | 6385           | 379               | 703 (636-778)                            |                  | 1239           | 79                | 833 (668-1039)                           |                  |
| <b>Diabetes</b>              |                |                   |                                          |                  |                |                   |                                          |                  |
| <b>No</b>                    | 6167           | 339               | 649 (583-721)                            | 1.00             | 1088           | 59                | 704 (545-908)                            | 1.00             |
| <b>Yes</b>                   | 101            | 28                | 3936 (2718-5701)                         | 3.15 (2.14-4.65) | 103            | 16                | 2166 (1327-3536)                         | 1.61 (0.90-2.86) |
| <b>Missing</b>               | 117            | 12                | 539 (298-973)                            |                  | 48             | 4                 | 1110 (416-2956)                          |                  |
| <b>SBP</b>                   |                |                   |                                          |                  |                |                   |                                          |                  |
| <b>&lt;140</b>               | 4701           | 198               | 493 (429-566)                            | 1.00             | 1068           | 56                | 682 (525-886)                            | 1.00             |
| <b>140-159</b>               | 1373           | 130               | 1150 (969-1366)                          | 1.39 (1.10-1.74) | 150            | 19                | 1681 (1072-2636)                         | 1.44 (0.83-2.49) |
| <b>&gt;160</b>               | 296            | 51                | 2228 (1693-2932)                         | 1.76 (1.28-2.42) | 21             | 4                 | 2865 (1075-7634)                         | 1.51 (0.53-4.28) |
| <b>Missing</b>               | 15             | 0                 |                                          |                  | 0              | 0                 |                                          |                  |
| <b>TC/HDL ratio</b>          |                |                   |                                          |                  |                |                   |                                          |                  |
| <b>&lt;5</b>                 | 4284           | 207               | 568 (495-650)                            | 1.00             | 538            | 21                | 499 (325-765)                            | 1.00             |
| <b>≥ 5</b>                   | 2090           | 170               | 980 (843-1139)                           | 1.64 (1.34-2.00) | 698            | 58                | 1105 (854-1430)                          | 2.14 (1.30-3.52) |
| <b>Missing</b>               | 11             | 2                 | 2328 (582-9307)                          |                  | 3              | 0                 |                                          |                  |
| <b>TC</b>                    |                |                   |                                          |                  |                |                   |                                          |                  |
| <b>&lt; 5 mmol/L</b>         | 1930           | 68                | 410 (324-520)                            | 1.00             | 407            | 19                | 609 (389-955)                            | 1.00             |
| <b>≥ 5 mmol/L</b>            | 4444           | 309               | 830 (742-927)                            | 1.17 (0.90-1.53) | 830            | 60                | 945 (734-1217)                           | 1.49 (0.89-2.49) |
| <b>Missing</b>               | 11             | 2                 | 2328 (582-9307)                          |                  | 2              | 0                 |                                          |                  |
| <b>HDL</b>                   |                |                   |                                          |                  |                |                   |                                          |                  |
| <b>&lt; 1.00 mmol/L</b>      | 1032           | 78                | 915 (733-1142)                           | 1.00             | 525            | 34                | 855 (611-1197)                           | 1.00             |
| <b>≥1.00 mmol/L</b>          | 5343           | 299               | 660 (589-739)                            | 0.61 (0.47-0.78) | 711            | 45                | 821 (613-1099)                           | 0.99 (0.63-1.55) |
| <b>Missing</b>               | 10             | 2                 | 2608 (652-10427)                         |                  | 3              | 0                 |                                          |                  |
| <b>Current daily smokers</b> |                |                   |                                          |                  |                |                   |                                          |                  |
| <b>No</b>                    | 4706           | 231               | 578 (508-657)                            | 1.00             | 905            | 52                | 749 (571-983)                            | 1.00             |
| <b>Yes</b>                   | 1660           | 146               | 1062 (903-1248)                          | 1.86 (1.51-2.29) | 302            | 25                | 1088 (735-1610)                          | 1.43 (0.88-2.30) |
| <b>Missing</b>               | 19             | 2                 | 1236 (309-4941)                          |                  | 32             | 2                 | 831 (208-3323)                           |                  |

CI, confidence interval; CVD, cardiovascular disease; HDL, high density lipoprotein; HR, hazard ratio; TC, total cholesterol; SBP, systolic blood pressure

Table A6. Crude rates and age-adjusted HR of CVD by risk factors, Norwegian and South Asian women from the Norwegian cohort.

|                              | Norwegian      |                   |                                          |                  | South Asian    |                   |                                          |                  |
|------------------------------|----------------|-------------------|------------------------------------------|------------------|----------------|-------------------|------------------------------------------|------------------|
|                              | No. of persons | No. of CVD events | Crude rate/100 000 person-years (95% CI) | HR (95% CI)      | No. of persons | No. of CVD events | Crude rate/100 000 person-years (95% CI) | HR (95% CI)      |
| <b>Total</b>                 | 8015           | 259               | 378 (335-427)                            |                  | 967            | 26                | 341 (232-501)                            |                  |
| <b>Diabetes</b>              |                |                   |                                          |                  |                |                   |                                          |                  |
| <b>No</b>                    | 7657           | 237               | 361 (318-410)                            | 1.00             | 816            | 17                | 262 (163-422)                            | 1.00             |
| <b>Yes</b>                   | 105            | 11                | 1305 (723-2356)                          | 2.79 (1.52-5.11) | 100            | 9                 | 1212 (630-2329)                          | 2.74 (1.21-6.22) |
| <b>Missing</b>               | 253            | 11                | 539 (298-973)                            |                  | 51             | 0                 |                                          |                  |
| <b>SBP</b>                   |                |                   |                                          |                  |                |                   |                                          |                  |
| <b>&lt;140</b>               | 6823           | 151               | 257 (219-302)                            | 1.00             | 876            | 18                | 260 (164-412)                            | 1.00             |
| <b>140-159</b>               | 920            | 76                | 999 (798-1251)                           | 1.82 (1.37-2.43) | 67             | 4                 | 774 (291-2062)                           | 1.45 (0.48-4.34) |
| <b>&gt;160</b>               | 266            | 31                | 1450 (1020-2062)                         | 2.11 (1.42-3.15) | 23             | 4                 | 2378 (892-6335)                          | 2.42 (0.76-7.71) |
| <b>Missing</b>               | 6              | 1                 | 2128 (300-15106)                         |                  | 1              | 0                 |                                          |                  |
| <b>TC/HDL ratio</b>          |                |                   |                                          |                  |                |                   |                                          |                  |
| <b>&lt;5</b>                 | 7225           | 203               | 328 (286-376)                            | 1.00             | 749            | 17                | 287 (178-462)                            | 1.00             |
| <b>≥ 5</b>                   | 781            | 54                | 833 (638-1088)                           | 1.79 (1.33-2.42) | 215            | 9                 | 537 (279-1032)                           | 1.46 (0.65-3.30) |
| <b>Missing</b>               | 9              | 2                 | 3122 (781-12483)                         |                  |                | 0                 |                                          |                  |
| <b>TC</b>                    |                |                   |                                          |                  |                |                   |                                          |                  |
| <b>&lt; 5 mmol/L</b>         | 3004           | 44                | 169 (125-227)                            | 1.00             | 524            | 8                 | 193 (97-386)                             | 1.00             |
| <b>≥ 5 mmol/L</b>            | 5002           | 213               | 503 (440-576)                            | 1.40 (1.00-1.97) | 440            | 18                | 521 (328-826)                            | 1.54 (0.65-3.64) |
| <b>Missing</b>               | 9              | 2                 | 3122 (781-12483)                         |                  | 3              | 0                 |                                          |                  |
| <b>HDL</b>                   |                |                   |                                          |                  |                |                   |                                          |                  |
| <b>&lt; 1.2 mmol/L</b>       | 1057           | 52                | 587 (447-770)                            | 1.00             | 465            | 12                | 329 (187-578)                            | 1.00             |
| <b>≥1.2 mmol/L</b>           | 6949           | 205               | 344 (300-395)                            | 0.55 (0.40-0.74) | 499            | 14                | 354 (210-598)                            | 0.77 (0.36-1.69) |
| <b>Missing</b>               | 9              | 2                 | 3122 (781-12483)                         |                  | 3              | 0                 |                                          |                  |
| <b>Current daily smokers</b> |                |                   |                                          |                  |                |                   |                                          |                  |
| <b>No</b>                    | 5461           | 134               | 285 (241-338)                            | 1.00             | 883            | 24                | 344 (231-514)                            | 1.00             |
| <b>Yes</b>                   | 2510           | 119               | 564 (471-675)                            | 2.22 (1.73-2.84) | 13             | 0                 |                                          |                  |
| <b>Missing</b>               | 44             | 6                 | 1759 (790-3916)                          |                  | 71             | 2                 | 365 (91-1461)                            |                  |

CI, confidence interval; CVD, cardiovascular disease; HDL, high density lipoprotein; HR, hazard ratio; TC, total cholesterol; SBP, systolic blood pressure

Table A7. Crude rates and age-adjusted HR of CVD by risk factors, European and Indian New Zealand men from the New Zealand cohort.

|                              | European       |                   |                                          |                  | Indian         |                   |                                          |                  |
|------------------------------|----------------|-------------------|------------------------------------------|------------------|----------------|-------------------|------------------------------------------|------------------|
|                              | No. of persons | No. of CVD events | Crude rate/100 000 person-years (95% CI) | HR (95% CI)      | No. of persons | No. of CVD events | Crude rate/100 000 person-years (95% CI) | HR (95% CI)      |
| <b>Total</b>                 | 63 319         | 1 518             | 815 (775-857)                            |                  | 9 997          | 273               | 933 (828-1050)                           |                  |
| <b>Type 2 diabetes</b>       |                |                   |                                          |                  |                |                   |                                          |                  |
| <b>No</b>                    | 57 760         | 1 241             | 728 (689-770)                            | 1.00             | 7 641          | 158               | 712 (610-833)                            | 1.00             |
| <b>Yes</b>                   | 5 559          | 277               | 1739 (1546-1957)                         | 1.92 (1.68-2.19) | 2 356          | 115               | 1622 (1351-1947)                         | 1.72 (1.34-2.20) |
| <b>Missing</b>               | 0              |                   |                                          |                  | 0              |                   |                                          |                  |
| <b>SBP</b>                   |                |                   |                                          |                  |                |                   |                                          |                  |
| <b>&lt;140</b>               | 42 666         | 776               | 632 (589-678)                            | 1.00             | 7 888          | 188               | 805 (698-929)                            | 1.00             |
| <b>140-159</b>               | 16 417         | 514               | 1030 (945-1123)                          | 1.35 (1.20-1.51) | 1 723          | 68                | 1431 (1128-1814)                         | 1.37 (1.03-1.81) |
| <b>&gt;160</b>               | 4 236          | 228               | 1675 (1471-1908)                         | 2.03 (1.75-2.36) | 386            | 17                | 1462 (909-2352)                          | 1.22 (0.74-2.02) |
| <b>Missing</b>               | 0              |                   |                                          |                  | 0              |                   |                                          |                  |
| <b>TC/HDL ratio</b>          |                |                   |                                          |                  |                |                   |                                          |                  |
| <b>&lt;5</b>                 | 45 177         | 994               | 756 (711-805)                            | 1.00             | 6 379          | 178               | 926 (799-1072)                           | 1.00             |
| <b>≥ 5</b>                   | 18 139         | 524               | 955 (876-1040)                           | 1.58 (1.42-1.76) | 3 617          | 95                | 946 (774-1157)                           | 1.28 (1.00-1.65) |
| <b>Missing*</b>              | 3              | 0                 |                                          |                  | 1              | 0                 |                                          |                  |
| <b>TC</b>                    |                |                   |                                          |                  |                |                   |                                          |                  |
| <b>&lt; 5 mmol/L</b>         | 20 226         | 395               | 879 (797-970)                            | 1.00             | 4 450          | 103               | 841 (693-1020)                           | 1.00             |
| <b>≥ 5 mmol/L</b>            | 36 071         | 684               | 756 (702-815)                            | 1.01 (0.89-1.14) | 5 130          | 137               | 974 (824-1152)                           | 1.36 (1.05-1.76) |
| <b>Missing*</b>              | 7 022          | 439               | 861 (785-946)                            |                  | 417            | 33                | 1114 (792-1567)                          |                  |
| <b>HDL</b>                   |                |                   |                                          |                  |                |                   |                                          |                  |
| <b>&lt; 1.00 mmol/L</b>      | 2 325          | 55                | 986 (757-1284)                           | 1.00             | 561            | 15                | 1327 (800-2202)                          | 1.00             |
| <b>≥1.00 mmol/L</b>          | 10 920         | 323               | 891 (799-993)                            | 0.87 (0.66-1.17) | 1 231          | 39                | 1140 (833-1561)                          | 0.62 (0.33-1.14) |
| <b>Missing*</b>              | 50 074         | 1 140             | 789 (744-836)                            |                  | 8 205          | 219               | 886 (776-1011)                           |                  |
| <b>Current daily smokers</b> |                |                   |                                          |                  |                |                   |                                          |                  |
| <b>No</b>                    | 55 587         | 1 197             | 733 (692-776)                            | 1.00             | 9 105          | 242               | 913 (805-1035)                           | 1.00             |
| <b>Yes</b>                   | 7 731          | 321               | 1396 (1252-1558)                         | 2.29 (2.02-2.59) | 892            | 31                | 1123 (790-1597)                          | 1.45 (0.99-2.11) |
| <b>Missing</b>               | 1              | 0                 |                                          |                  | 0              |                   |                                          |                  |

CI, confidence interval; CVD, cardiovascular disease; HDL, high density lipoprotein; HR, hazard ratio; TC, total cholesterol; SBP, systolic blood pressure. \*The number of missing information is different for TC/HDL ratio than for TC and HDL separately. This is because the risk factors included in the PREDICT risk assessment (age, gender, smoking, diabetes, systolic BP and total cholesterol/HDL ratio) was compulsory for assessing risk. Risk factors not compulsory for risk assessment consequently have more missing information (e.g. the HDL and TC)

Table A8. Crude rates and age-adjusted HR of CVD by risk factors, European and Indian New Zealand women from the New Zealand cohort.

|                              | European       |                   |                                          |                  | Indian         |                   |                                          |                   |
|------------------------------|----------------|-------------------|------------------------------------------|------------------|----------------|-------------------|------------------------------------------|-------------------|
|                              | No. of persons | No. of CVD events | Crude rate/100 000 person-years (95% CI) | HR               | No. of persons | No. of CVD events | Crude rate/100 000 person-years (95% CI) | HR                |
| <b>Total</b>                 | 49 094         | 757               | 528 (492-567)                            |                  | 7 039          | 106               | 531 (439-643)                            |                   |
| <b>Type 2 diabetes</b>       |                |                   |                                          |                  |                |                   |                                          |                   |
| <b>No</b>                    | 44 880         | 635               | 485 (448-524)                            | 1.00             | 5 010          | 50                | 358 (271-472)                            | 1.00              |
| <b>Yes</b>                   | 4 214          | 122               | 994 (832-1187)                           | 1.93 (1.59-2.35) | 2 029          | 56                | 936 (720-1216)                           | 2.29 (1.55-3.37)  |
| <b>Missing</b>               | 0              |                   |                                          |                  | 0              |                   |                                          |                   |
| <b>SBP</b>                   |                |                   |                                          |                  |                |                   |                                          |                   |
| <b>&lt;140</b>               | 32 178         | 395               | 436 (395-481)                            | 1.00             | 5 370          | 56                | 371 (285-482)                            | 1.00              |
| <b>140-159</b>               | 13 019         | 258               | 646 (572-730)                            | 1.22 (1.04-1.44) | 1 281          | 34                | 919 (656-1286)                           | 2.11 (1.37-3.26)  |
| <b>&gt;160</b>               | 3 896          | 104               | 813 (671-985)                            | 1.42 (1.14-1.77) | 388            | 16                | 1388 (851-2266)                          | 2.99 (1.70-5.27)  |
| <b>Missing</b>               | 1              | 0                 |                                          |                  | 0              |                   |                                          |                   |
| <b>TC/HDL ratio</b>          |                |                   |                                          |                  |                |                   |                                          |                   |
| <b>&lt;5</b>                 | 42 800         | 626               | 507 (469-549)                            | 1.00             | 5 895          | 89                | 527 (428-648)                            | 1.00              |
| <b>≥ 5</b>                   | 6 289          | 131               | 658 (555-781)                            | 1.42 (1.17-1.71) | 1 143          | 17                | 559 (347-898)                            | 1.11 (0.66-1.86)  |
| <b>Missing*</b>              | 5              | 0                 |                                          |                  | 1              | 0                 |                                          |                   |
| <b>TC</b>                    |                |                   |                                          |                  |                |                   |                                          |                   |
| <b>&lt; 5 mmol/L</b>         | 10 940         | 127               | 515 (433-613)                            | 1.00             | 3 277          | 57                | 639 (493-828)                            | 1.00              |
| <b>≥ 5 mmol/L</b>            | 32 974         | 415               | 516 (469-569)                            | 0.96 (0.79-1.17) | 3 515          | 37                | 398 (289-550)                            | 0.62 (0.41-0.94)  |
| <b>Missing*</b>              | 5 180          | 215               | 561 (491-641)                            |                  | 247            | 12                | 689 (391-1212)                           |                   |
| <b>HDL</b>                   |                |                   |                                          |                  |                |                   |                                          |                   |
| <b>&lt; 1.2 mmol/L</b>       | 1 852          | 26                | 529 (360-776)                            | 1.00             | 568            | 9                 | 781 (406-1501)                           | 1.00              |
| <b>≥1.2 mmol/L</b>           | 7 985          | 149               | 578 (492-678)                            | 0.97 (0.64-1.47) | 866            | 14                | 600 (355-1013)                           | 0.75 (0.32-1.77)  |
| <b>Missing*</b>              | 39 257         | 582               | 517 (477-561)                            |                  | 5 605          | 83                | 504 (406-625)                            |                   |
| <b>Current daily smokers</b> |                |                   |                                          |                  |                |                   |                                          |                   |
| <b>No</b>                    | 43 994         | 595               | 466 (430-505)                            | 1.00             | 6 973          | 104               | 526 (434-638)                            | 1.00              |
| <b>Yes</b>                   | 5 100          | 162               | 1038 (890-1211)                          | 2.74 (2.30-3.27) | 66             | 2                 | 1090 (272-4357)                          | 2.60 (0.64-10.59) |
| <b>Missing</b>               | 0              |                   |                                          |                  | 0              |                   |                                          |                   |

CI, confidence interval; CVD, cardiovascular disease; HDL, high density lipoprotein; HR, hazard ratio; TC, total cholesterol; SBP, systolic blood pressure. \*The number of missing information is different for TC/HDL ratio than for TC and HDL separately. This is because the risk factors included in the PREDICT risk assessment (age, gender, smoking, diabetes, systolic BP and total cholesterol/HDL ratio) was compulsory for assessing risk. Risk factors not compulsory for risk assessment consequently have more missing information (e.g. the HDL and TC).

Table A9. Hazard ratios for first **CHD** event in South Asian groups compared to ethnic European groups in New Zealand and Norway.

|                                                   | Men                       |                             | Women                     |                             |
|---------------------------------------------------|---------------------------|-----------------------------|---------------------------|-----------------------------|
|                                                   | Indian NZ vs. European NZ | South Asians vs. Norwegians | Indian NZ vs. European NZ | South Asians vs. Norwegians |
| <i>Adjusted for</i>                               |                           |                             |                           |                             |
| Age                                               | 2.10 (1.79-2.46)          | 2.45 (1.82-3.30)            | 1.60 (1.22-2.10)          | 3.23 (1.95-5.34)            |
| Age, TC/HDL ratio                                 | 2.13 (1.81-2.50)          | 2.04 (1.51-2.76)            | 1.58 (1.20-2.07)          | 2.71 (1.61-4.54)            |
| Age, TC/HDL ratio, diabetes                       | 1.92 (1.63-2.26)          | 1.68 (1.23-2.30)            | 1.31 (0.99-1.74)          | 2.24 (1.30-3.86)            |
| Age, TC/HDL ratio, diabetes, systolic BP          | 2.00 (1.70-2.36)          | 1.81 (1.32-2.48)            | 1.36 (1.02-1.80)          | 2.26 (1.31-3.90)            |
| Age, TC/HDL ratio, diabetes, systolic BP, smoking | 2.07 (1.76-2.44)          | 1.86 (1.36-2.55)            | 1.60 (1.20-2.13)          | 2.84 (1.61-5.03)            |

HDL, high density lipoprotein; NZ, New Zealand; SBP, systolic blood pressure; TC, Total cholesterol.

All had complete information on the risk factors

STROBE 2007 (v4) Statement—Checklist of items that should be included in reports of *cohort studies*

| Section/Topic                | Item # | Recommendation                                                                                                                                                                       | Reported on page # |
|------------------------------|--------|--------------------------------------------------------------------------------------------------------------------------------------------------------------------------------------|--------------------|
| Title and abstract           | 1      | (a) Indicate the study's design with a commonly used term in the title or the abstract                                                                                               | 1,2                |
|                              |        | (b) Provide in the abstract an informative and balanced summary of what was done and what was found                                                                                  | 2-3                |
| <b>Introduction</b>          |        |                                                                                                                                                                                      |                    |
| Background/rationale         | 2      | Explain the scientific background and rationale for the investigation being reported                                                                                                 | 4-5                |
| Objectives                   | 3      | State specific objectives, including any prespecified hypotheses                                                                                                                     | 5                  |
| <b>Methods</b>               |        |                                                                                                                                                                                      |                    |
| Study design                 | 4      | Present key elements of study design early in the paper                                                                                                                              | 5                  |
| Setting                      | 5      | Describe the setting, locations, and relevant dates, including periods of recruitment, exposure, follow-up, and data collection                                                      | 5-8                |
| Participants                 | 6      | (a) Give the eligibility criteria, and the sources and methods of selection of participants. Describe methods of follow-up                                                           | 6-8                |
|                              |        | (b) For matched studies, give matching criteria and number of exposed and unexposed                                                                                                  |                    |
| Variables                    | 7      | Clearly define all outcomes, exposures, predictors, potential confounders, and effect modifiers. Give diagnostic criteria, if applicable                                             | 6-9                |
| Data sources/<br>measurement | 8*     | For each variable of interest, give sources of data and details of methods of assessment (measurement). Describe comparability of assessment methods if there is more than one group | 5-9                |
| Bias                         | 9      | Describe any efforts to address potential sources of bias                                                                                                                            | 10                 |
| Study size                   | 10     | Explain how the study size was arrived at                                                                                                                                            | 6-8,11             |
| Quantitative variables       | 11     | Explain how quantitative variables were handled in the analyses. If applicable, describe which groupings were chosen and why                                                         | 9-10               |
| Statistical methods          | 12     | (a) Describe all statistical methods, including those used to control for confounding                                                                                                | 9-10               |
|                              |        | (b) Describe any methods used to examine subgroups and interactions                                                                                                                  | 9-10               |
|                              |        | (c) Explain how missing data were addressed                                                                                                                                          | 10                 |
|                              |        | (d) If applicable, explain how loss to follow-up was addressed                                                                                                                       | 10                 |
|                              |        | (e) Describe any sensitivity analyses                                                                                                                                                | 10                 |
| <b>Results</b>               |        |                                                                                                                                                                                      |                    |

|                  |     |                                                                                                                                                                                                   |                                                                                                                                                                                                                                                                                                    |
|------------------|-----|---------------------------------------------------------------------------------------------------------------------------------------------------------------------------------------------------|----------------------------------------------------------------------------------------------------------------------------------------------------------------------------------------------------------------------------------------------------------------------------------------------------|
| Participants     | 13* | (a) Report numbers of individuals at each stage of study—eg numbers potentially eligible, examined for eligibility, confirmed eligible, included in the study, completing follow-up, and analysed | 11                                                                                                                                                                                                                                                                                                 |
|                  |     | (b) Give reasons for non-participation at each stage                                                                                                                                              | We did not have information about reasons for non-participation in CONOR, but participation rates are given on page 7 and the possibility of self-selection bias is discussed on page 18. This was not relevant for the PREDICT cohort since it was based on contact with the primary health care. |
|                  |     | (c) Consider use of a flow diagram                                                                                                                                                                | Different persons were involved in the exclusion of participants, so it was easier to describe this process in text.                                                                                                                                                                               |
| Descriptive data | 14* | (a) Give characteristics of study participants (eg demographic, clinical, social) and information on exposures and potential confounders                                                          | 11-13                                                                                                                                                                                                                                                                                              |
|                  |     | (b) Indicate number of participants with missing data for each variable of interest                                                                                                               | Tables A3-A6 in the appendices                                                                                                                                                                                                                                                                     |
|                  |     | (c) Summarise follow-up time (eg, average and total amount)                                                                                                                                       | 12 (Table 1)                                                                                                                                                                                                                                                                                       |
| Outcome data     | 15* | Report numbers of outcome events or summary measures over time                                                                                                                                    | 13                                                                                                                                                                                                                                                                                                 |

1  
2  
3  
4  
5  
6  
7  
8  
9  
10  
11  
12  
13  
14  
15  
16  
17  
18  
19  
20  
21  
22  
23  
24  
25  
26  
27  
28  
29  
30  
31  
32  
33  
34  
35  
36  
37  
38  
39  
40  
41  
42  
43  
44  
45  
46  
47  
48  
49

|                          |    |                                                                                                                                                                                                              |                                                  |
|--------------------------|----|--------------------------------------------------------------------------------------------------------------------------------------------------------------------------------------------------------------|--------------------------------------------------|
| Main results             | 16 | (a) Give unadjusted estimates and, if applicable, confounder-adjusted estimates and their precision (eg, 95% confidence interval). Make clear which confounders were adjusted for and why they were included | 15-16                                            |
|                          |    | (b) Report category boundaries when continuous variables were categorized                                                                                                                                    | 12 (in table legend) and 26-29                   |
|                          |    | (c) If relevant, consider translating estimates of relative risk into absolute risk for a meaningful time period                                                                                             |                                                  |
| Other analyses           | 17 | Report other analyses done—eg analyses of subgroups and interactions, and sensitivity analyses                                                                                                               | Sensitivity analyses are reported on page 14, 16 |
| <b>Discussion</b>        |    |                                                                                                                                                                                                              |                                                  |
| Key results              | 18 | Summarise key results with reference to study objectives                                                                                                                                                     | 17                                               |
| <b>Limitations</b>       |    |                                                                                                                                                                                                              |                                                  |
| Interpretation           | 20 | Give a cautious overall interpretation of results considering objectives, limitations, multiplicity of analyses, results from similar studies, and other relevant evidence                                   | 17-22                                            |
| Generalisability         | 21 | Discuss the generalisability (external validity) of the study results                                                                                                                                        | 17                                               |
| <b>Other information</b> |    |                                                                                                                                                                                                              |                                                  |
| Funding                  | 22 | Give the source of funding and the role of the funders for the present study and, if applicable, for the original study on which the present article is based                                                | 23                                               |

\*Give information separately for cases and controls in case-control studies and, if applicable, for exposed and unexposed groups in cohort and cross-sectional studies.

**Note:** An Explanation and Elaboration article discusses each checklist item and gives methodological background and published examples of transparent reporting. The STROBE checklist is best used in conjunction with this article (freely available on the Web sites of PLoS Medicine at <http://www.plosmedicine.org/>, Annals of Internal Medicine at <http://www.annals.org/>, and Epidemiology at <http://www.epidem.com/>). Information on the STROBE Initiative is available at [www.strobe-statement.org](http://www.strobe-statement.org).
