# Supplementary material for: Can traditional risk factors explain the higher risk of cardiovascular disease in South Asians compared to Europeans in Norway and New Zealand? Two cohort studies
Source: PubMed Central journal article supplement — BMJ Open. 2017 Dec 6;7(12):e016819. doi: 10.1136/bmjopen-2017-016819 (PMC5728264; doi:10.1136/bmjopen-2017-016819), 2017-12-06
Supplement: bmjopen-2017-016819supp001.pdf [file bmjopen-2017-016819supp001.pdf]

## Appendix

Table A1. Hazard ratios (95% CI) for first CVD event in South Asian groups compared to ethnic European groups in New Zealand and Norway- risk factors introduced in a different order than in the main analyses.

|                                                  | Men                    |                             | Women                     |                             |
|--------------------------------------------------|------------------------|-----------------------------|---------------------------|-----------------------------|
|                                                  | Indian vs. European NZ | South Asians vs. Norwegians | Indian NZ vs. European NZ | South Asians vs. Norwegians |
| <b><i>N events/N</i></b>                         | 1791/73308             | 436/7387                    | 863/56126                 | 264/8558                    |
| <b><i>Adjusted for</i></b>                       |                        |                             |                           |                             |
| <b>Age</b>                                       | 1.75 (1.53-2.00)       | 1.92 (1.48-2.49)            | 1.42 (1.16-1.75)          | 1.87 (1.21-2.87)            |
| <b>Age, diabetes</b>                             | 1.48 (1.29-1.70)       | 1.64 (1.25-2.15)            | 1.15 (0.93-1.43)          | 1.52 (0.96-2.39)            |
| <b>Age, diabetes, SBP</b>                        | 1.56 (1.36-1.79)       | 1.76 (1.34-2.31)            | 1.19 (0.96-1.48)          | 1.49 (0.94-2.36)            |
| <b>Age, diabetes, SBP, smoking</b>               | 1.63 (1.42-1.87)       | 1.78 (1.35-2.33)            | 1.39 (1.12-1.74)          | 2.00 (1.25-3.20)            |
| <b>Age, diabetes, SBP, smoking, TC/HDL ratio</b> | 1.64 (1.43-1.88)       | 1.57 (1.19-2.07)            | 1.39 (1.11-1.73)          | 1.76 (1.09-2.82)            |

Table A2. Hazard ratios (95% CI) for first CVD event in South Asian groups compared to ethnic European groups in New Zealand and Norway – adjusting for each risk factor in separate models with only age as covariate.

|                                  | Men                    |                             | Women                     |                             |
|----------------------------------|------------------------|-----------------------------|---------------------------|-----------------------------|
|                                  | Indian vs. European NZ | South Asians vs. Norwegians | Indian NZ vs. European NZ | South Asians vs. Norwegians |
| <b><i>N events/N</i></b>         | 1791/73308             | 436/7387                    | 863/56126                 | 264/8558                    |
| <b><i>Adjusted for</i></b>       |                        |                             |                           |                             |
| <b>Age only</b>                  | 1.75 (1.53-2.00)       | 1.92 (1.48-2.49)            | 1.42 (1.16-1.75)          | 1.87 (1.21-2.87)            |
| <b>Age and diabetes only</b>     | 1.48 (1.29-1.70)       | 1.64 (1.25-2.15)            | 1.15 (0.93-1.43)          | 1.52 (0.96-2.39)            |
| <b>Age and TC/HDL ratio only</b> | 1.77 (1.55-2.02)       | 1.66 (1.27-2.16)            | 1.41 (1.14-1.73)          | 1.52 (0.98-2.36)            |
| <b>Age and SBP only</b>          | 1.84 (1.61-2.10)       | 2.04 (1.57-2.65)            | 1.47 (1.20-1.82)          | 1.84 (1.20-2.82)            |
| <b>Age and smoking only</b>      | 1.84 (1.61-2.10)       | 2.46 (1.58-3.84)            | 1.67 (1.35-2.07)          | 1.94 (1.49-2.51)            |

Table A3. Age-adjusted hazard ratios for first CVD event after baseline for selected risk factors in men and women aged 30-74 years with no history of CVD, stratified by cohort, ethnicity and gender – with and without adjustment for medication at baseline.

| MEN                       | N events/N* | SBP (10 mm/Hg)   | SBP (10 mm/Hg) adjusted for BP medication | TC/HDL ratio (one unit) | TC/HDL ratio (one unit) adjusted for lipid lowering medication |
|---------------------------|-------------|------------------|-------------------------------------------|-------------------------|----------------------------------------------------------------|
| <i>New Zealand cohort</i> |             | HR (95%CI)       | HR (95%CI)                                | HR (95%CI)              | HR (95%CI)                                                     |
| European men              | 1518/63316  | 1.15 (1.12-1.18) | 1.14 (1.11-1.17)                          | 1.20 (1.16-1.23)        | 1.20 (1.16-1.24)                                               |
| Indian men                | 273/9997    | 1.05 (0.98-1.13) | 1.03 (0.96-1.11)                          | 1.08 (0.98-1.19)        | 1.10 (1.00-1.20)                                               |
| <i>Norwegian cohort</i>   |             |                  |                                           |                         |                                                                |
| Norwegian men             | 379/6385    | 1.15 (1.08-1.22) | 1.13 (1.06-1.20)                          | 1.22 (1.15-1.30)        | 1.23 (1.16-1.31)                                               |
| South Asian men           | 79/1239     | 1.17 (1.01-1.35) | 1.14 (0.98-1.32)                          | 1.23 (1.05-1.42)        | 1.21 (1.04-1.42)                                               |
|                           |             |                  |                                           |                         |                                                                |
| WOMEN                     | N events/N* | SBP(10 mm/Hg)    | SBP (10 mm/Hg) adjusted for BP medication | TC/HDL ratio (one unit) | TC/HDL ratio (one unit) adjusted for lipid lowering medication |
| <i>New Zealand cohort</i> |             | HR (95%CI)       |                                           | HR (95%CI)              |                                                                |
| European women            | 757/49094   | 1.09 (1.05-1.13) | 1.07 (1.03-1.12)                          | 1.14 (1.09-1.21)        | 1.15 (1.09-1.21)                                               |
| Indian women              | 106/7039    | 1.27 (1.16-1.39) | 1.23 (1.12-1.36)                          | 1.21 (1.03-1.41)        | 1.22 (1.04-1.42)                                               |
| <i>Norwegian cohort</i>   |             |                  |                                           |                         |                                                                |
| Norwegian women           | 259/8015    | 1.20 (1.12-1.28) | 1.18 (1.11-1.26)                          | 1.30 (1.19-1.43)        | 1.33 (1.21-1.46)                                               |
| South Asian women         | 26/967      | 1.06 (0.86-1.30) | 1.06 (0.85-1.31)                          | 1.04 (0.77-1.39)        | 1.01 (0.75-1.37)                                               |

\*The numbers of events and people included in the analyses may differ due to missing risk factor data. Few were missing in the NZ cohort. SBP, systolic blood pressure; TC, total cholesterol; HDL, high density lipoprotein.

Table A4. Hazard ratios (95% CI) for first CVD event in South Asian groups compared to ethnic European groups in New Zealand and Norway – with and without adjustment for medication at baseline.

|                                                                                                                     | Men                    |                             | Women                     |                             |
|---------------------------------------------------------------------------------------------------------------------|------------------------|-----------------------------|---------------------------|-----------------------------|
|                                                                                                                     | Indian vs. European NZ | South Asians vs. Norwegians | Indian NZ vs. European NZ | South Asians vs. Norwegians |
| <b>N events/N</b>                                                                                                   | 1791/73308             | 436/7387                    | 863/56126                 | 264/8558                    |
| <b>Adjusted for</b>                                                                                                 |                        |                             |                           |                             |
| Age, TC/HDL ratio, diabetes, SBP, smoking                                                                           | 1.64 (1.43-1.88)       | 1.57 (1.19-2.07)            | 1.39 (1.11-1.73)          | 1.76 (1.09-2.82)            |
| Age, TC/HDL ratio, diabetes, SBP, smoking + medication use at baseline (antihypertensives and lipid lowering drugs) | 1.62 (1.41-1.86)       | 1.53 (1.16-2.03)            | 1.37 (1.10-1.71)          | 1.71 (1.05-2.76)            |

HDL, high density lipoprotein; NZ, New Zealand; SBP, systolic blood pressure; TC, Total cholesterol. All had complete information on the risk factors

Table A5. Crude rates and age-adjusted HR of CVD by risk factors, Norwegian and South Asian men from the Norwegian cohort.

|                              | Norwegian      |                   |                                          |                  | South Asian    |                   |                                          |                  |
|------------------------------|----------------|-------------------|------------------------------------------|------------------|----------------|-------------------|------------------------------------------|------------------|
|                              | No. of persons | No. of CVD events | Crude rate/100 000 person-years (95% CI) | HR (95% CI)      | No. of persons | No. of CVD events | Crude rate/100 000 person-years (95% CI) | HR (95% CI)      |
| <b>Total</b>                 | 6385           | 379               | 703 (636-778)                            |                  | 1239           | 79                | 833 (668-1039)                           |                  |
| <b>Diabetes</b>              |                |                   |                                          |                  |                |                   |                                          |                  |
| <b>No</b>                    | 6167           | 339               | 649 (583-721)                            | 1.00             | 1088           | 59                | 704 (545-908)                            | 1.00             |
| <b>Yes</b>                   | 101            | 28                | 3936 (2718-5701)                         | 3.15 (2.14-4.65) | 103            | 16                | 2166 (1327-3536)                         | 1.61 (0.90-2.86) |
| <b>Missing</b>               | 117            | 12                | 539 (298-973)                            |                  | 48             | 4                 | 1110 (416-2956)                          |                  |
| <b>SBP</b>                   |                |                   |                                          |                  |                |                   |                                          |                  |
| <b>&lt;140</b>               | 4701           | 198               | 493 (429-566)                            | 1.00             | 1068           | 56                | 682 (525-886)                            | 1.00             |
| <b>140-159</b>               | 1373           | 130               | 1150 (969-1366)                          | 1.39 (1.10-1.74) | 150            | 19                | 1681 (1072-2636)                         | 1.44 (0.83-2.49) |
| <b>&gt;160</b>               | 296            | 51                | 2228 (1693-2932)                         | 1.76 (1.28-2.42) | 21             | 4                 | 2865 (1075-7634)                         | 1.51 (0.53-4.28) |
| <b>Missing</b>               | 15             | 0                 |                                          |                  | 0              | 0                 |                                          |                  |
| <b>TC/HDL ratio</b>          |                |                   |                                          |                  |                |                   |                                          |                  |
| <b>&lt;5</b>                 | 4284           | 207               | 568 (495-650)                            | 1.00             | 538            | 21                | 499 (325-765)                            | 1.00             |
| <b>≥ 5</b>                   | 2090           | 170               | 980 (843-1139)                           | 1.64 (1.34-2.00) | 698            | 58                | 1105 (854-1430)                          | 2.14 (1.30-3.52) |
| <b>Missing</b>               | 11             | 2                 | 2328 (582-9307)                          |                  | 3              | 0                 |                                          |                  |
| <b>TC</b>                    |                |                   |                                          |                  |                |                   |                                          |                  |
| <b>&lt; 5 mmol/L</b>         | 1930           | 68                | 410 (324-520)                            | 1.00             | 407            | 19                | 609 (389-955)                            | 1.00             |
| <b>≥ 5 mmol/L</b>            | 4444           | 309               | 830 (742-927)                            | 1.17 (0.90-1.53) | 830            | 60                | 945 (734-1217)                           | 1.49 (0.89-2.49) |
| <b>Missing</b>               | 11             | 2                 | 2328 (582-9307)                          |                  | 2              | 0                 |                                          |                  |
| <b>HDL</b>                   |                |                   |                                          |                  |                |                   |                                          |                  |
| <b>&lt; 1.00 mmol/L</b>      | 1032           | 78                | 915 (733-1142)                           | 1.00             | 525            | 34                | 855 (611-1197)                           | 1.00             |
| <b>≥1.00 mmol/L</b>          | 5343           | 299               | 660 (589-739)                            | 0.61 (0.47-0.78) | 711            | 45                | 821 (613-1099)                           | 0.99 (0.63-1.55) |
| <b>Missing</b>               | 10             | 2                 | 2608 (652-10427)                         |                  | 3              | 0                 |                                          |                  |
| <b>Current daily smokers</b> |                |                   |                                          |                  |                |                   |                                          |                  |
| <b>No</b>                    | 4706           | 231               | 578 (508-657)                            | 1.00             | 905            | 52                | 749 (571-983)                            | 1.00             |
| <b>Yes</b>                   | 1660           | 146               | 1062 (903-1248)                          | 1.86 (1.51-2.29) | 302            | 25                | 1088 (735-1610)                          | 1.43 (0.88-2.30) |
| <b>Missing</b>               | 19             | 2                 | 1236 (309-4941)                          |                  | 32             | 2                 | 831 (208-3323)                           |                  |

CI, confidence interval; CVD, cardiovascular disease; HDL, high density lipoprotein; HR, hazard ratio; TC, total cholesterol; SBP, systolic blood pressure

Table A6. Crude rates and age-adjusted HR of CVD by risk factors, Norwegian and South Asian women from the Norwegian cohort.

|                              | Norwegian      |                   |                                          |                  | South Asian    |                   |                                          |                  |
|------------------------------|----------------|-------------------|------------------------------------------|------------------|----------------|-------------------|------------------------------------------|------------------|
|                              | No. of persons | No. of CVD events | Crude rate/100 000 person-years (95% CI) | HR (95% CI)      | No. of persons | No. of CVD events | Crude rate/100 000 person-years (95% CI) | HR (95% CI)      |
| <b>Total</b>                 | 8015           | 259               | 378 (335-427)                            |                  | 967            | 26                | 341 (232-501)                            |                  |
| <b>Diabetes</b>              |                |                   |                                          |                  |                |                   |                                          |                  |
| <b>No</b>                    | 7657           | 237               | 361 (318-410)                            | 1.00             | 816            | 17                | 262 (163-422)                            | 1.00             |
| <b>Yes</b>                   | 105            | 11                | 1305 (723-2356)                          | 2.79 (1.52-5.11) | 100            | 9                 | 1212 (630-2329)                          | 2.74 (1.21-6.22) |
| <b>Missing</b>               | 253            | 11                | 539 (298-973)                            |                  | 51             | 0                 |                                          |                  |
| <b>SBP</b>                   |                |                   |                                          |                  |                |                   |                                          |                  |
| <b>&lt;140</b>               | 6823           | 151               | 257 (219-302)                            | 1.00             | 876            | 18                | 260 (164-412)                            | 1.00             |
| <b>140-159</b>               | 920            | 76                | 999 (798-1251)                           | 1.82 (1.37-2.43) | 67             | 4                 | 774 (291-2062)                           | 1.45 (0.48-4.34) |
| <b>&gt;160</b>               | 266            | 31                | 1450 (1020-2062)                         | 2.11 (1.42-3.15) | 23             | 4                 | 2378 (892-6335)                          | 2.42 (0.76-7.71) |
| <b>Missing</b>               | 6              | 1                 | 2128 (300-15106)                         |                  | 1              | 0                 |                                          |                  |
| <b>TC/HDL ratio</b>          |                |                   |                                          |                  |                |                   |                                          |                  |
| <b>&lt;5</b>                 | 7225           | 203               | 328 (286-376)                            | 1.00             | 749            | 17                | 287 (178-462)                            | 1.00             |
| <b>≥ 5</b>                   | 781            | 54                | 833 (638-1088)                           | 1.79 (1.33-2.42) | 215            | 9                 | 537 (279-1032)                           | 1.46 (0.65-3.30) |
| <b>Missing</b>               | 9              | 2                 | 3122 (781-12483)                         |                  |                | 0                 |                                          |                  |
| <b>TC</b>                    |                |                   |                                          |                  |                |                   |                                          |                  |
| <b>&lt; 5 mmol/L</b>         | 3004           | 44                | 169 (125-227)                            | 1.00             | 524            | 8                 | 193 (97-386)                             | 1.00             |
| <b>≥ 5 mmol/L</b>            | 5002           | 213               | 503 (440-576)                            | 1.40 (1.00-1.97) | 440            | 18                | 521 (328-826)                            | 1.54 (0.65-3.64) |
| <b>Missing</b>               | 9              | 2                 | 3122 (781-12483)                         |                  | 3              | 0                 |                                          |                  |
| <b>HDL</b>                   |                |                   |                                          |                  |                |                   |                                          |                  |
| <b>&lt; 1.2 mmol/L</b>       | 1057           | 52                | 587 (447-770)                            | 1.00             | 465            | 12                | 329 (187-578)                            | 1.00             |
| <b>≥1.2 mmol/L</b>           | 6949           | 205               | 344 (300-395)                            | 0.55 (0.40-0.74) | 499            | 14                | 354 (210-598)                            | 0.77 (0.36-1.69) |
| <b>Missing</b>               | 9              | 2                 | 3122 (781-12483)                         |                  | 3              | 0                 |                                          |                  |
| <b>Current daily smokers</b> |                |                   |                                          |                  |                |                   |                                          |                  |
| <b>No</b>                    | 5461           | 134               | 285 (241-338)                            | 1.00             | 883            | 24                | 344 (231-514)                            | 1.00             |
| <b>Yes</b>                   | 2510           | 119               | 564 (471-675)                            | 2.22 (1.73-2.84) | 13             | 0                 |                                          |                  |
| <b>Missing</b>               | 44             | 6                 | 1759 (790-3916)                          |                  | 71             | 2                 | 365 (91-1461)                            |                  |

CI, confidence interval; CVD, cardiovascular disease; HDL, high density lipoprotein; HR, hazard ratio; TC, total cholesterol; SBP, systolic blood pressure

Table A7. Crude rates and age-adjusted HR of CVD by risk factors, European and Indian New Zealand men from the New Zealand cohort.

|                              | European       |                   |                                          |                  | Indian         |                   |                                          |                  |
|------------------------------|----------------|-------------------|------------------------------------------|------------------|----------------|-------------------|------------------------------------------|------------------|
|                              | No. of persons | No. of CVD events | Crude rate/100 000 person-years (95% CI) | HR (95% CI)      | No. of persons | No. of CVD events | Crude rate/100 000 person-years (95% CI) | HR (95% CI)      |
| <b>Total</b>                 | 63 319         | 1 518             | 815 (775-857)                            |                  | 9 997          | 273               | 933 (828-1050)                           |                  |
| <b>Type 2 diabetes</b>       |                |                   |                                          |                  |                |                   |                                          |                  |
| <b>No</b>                    | 57 760         | 1 241             | 728 (689-770)                            | 1.00             | 7 641          | 158               | 712 (610-833)                            | 1.00             |
| <b>Yes</b>                   | 5 559          | 277               | 1739 (1546-1957)                         | 1.92 (1.68-2.19) | 2 356          | 115               | 1622 (1351-1947)                         | 1.72 (1.34-2.20) |
| <b>Missing</b>               | 0              |                   |                                          |                  | 0              |                   |                                          |                  |
| <b>SBP</b>                   |                |                   |                                          |                  |                |                   |                                          |                  |
| <b>&lt;140</b>               | 42 666         | 776               | 632 (589-678)                            | 1.00             | 7 888          | 188               | 805 (698-929)                            | 1.00             |
| <b>140-159</b>               | 16 417         | 514               | 1030 (945-1123)                          | 1.35 (1.20-1.51) | 1 723          | 68                | 1431 (1128-1814)                         | 1.37 (1.03-1.81) |
| <b>&gt;160</b>               | 4 236          | 228               | 1675 (1471-1908)                         | 2.03 (1.75-2.36) | 386            | 17                | 1462 (909-2352)                          | 1.22 (0.74-2.02) |
| <b>Missing</b>               | 0              |                   |                                          |                  | 0              |                   |                                          |                  |
| <b>TC/HDL ratio</b>          |                |                   |                                          |                  |                |                   |                                          |                  |
| <b>&lt;5</b>                 | 45 177         | 994               | 756 (711-805)                            | 1.00             | 6 379          | 178               | 926 (799-1072)                           | 1.00             |
| <b>≥ 5</b>                   | 18 139         | 524               | 955 (876-1040)                           | 1.58 (1.42-1.76) | 3 617          | 95                | 946 (774-1157)                           | 1.28 (1.00-1.65) |
| <b>Missing*</b>              | 3              | 0                 |                                          |                  | 1              | 0                 |                                          |                  |
| <b>TC</b>                    |                |                   |                                          |                  |                |                   |                                          |                  |
| <b>&lt; 5 mmol/L</b>         | 20 226         | 395               | 879 (797-970)                            | 1.00             | 4 450          | 103               | 841 (693-1020)                           | 1.00             |
| <b>≥ 5 mmol/L</b>            | 36 071         | 684               | 756 (702-815)                            | 1.01 (0.89-1.14) | 5 130          | 137               | 974 (824-1152)                           | 1.36 (1.05-1.76) |
| <b>Missing*</b>              | 7 022          | 439               | 861 (785-946)                            |                  | 417            | 33                | 1114 (792-1567)                          |                  |
| <b>HDL</b>                   |                |                   |                                          |                  |                |                   |                                          |                  |
| <b>&lt; 1.00 mmol/L</b>      | 2 325          | 55                | 986 (757-1284)                           | 1.00             | 561            | 15                | 1327 (800-2202)                          | 1.00             |
| <b>≥1.00 mmol/L</b>          | 10 920         | 323               | 891 (799-993)                            | 0.87 (0.66-1.17) | 1 231          | 39                | 1140 (833-1561)                          | 0.62 (0.33-1.14) |
| <b>Missing*</b>              | 50 074         | 1 140             | 789 (744-836)                            |                  | 8 205          | 219               | 886 (776-1011)                           |                  |
| <b>Current daily smokers</b> |                |                   |                                          |                  |                |                   |                                          |                  |
| <b>No</b>                    | 55 587         | 1 197             | 733 (692-776)                            | 1.00             | 9 105          | 242               | 913 (805-1035)                           | 1.00             |
| <b>Yes</b>                   | 7 731          | 321               | 1396 (1252-1558)                         | 2.29 (2.02-2.59) | 892            | 31                | 1123 (790-1597)                          | 1.45 (0.99-2.11) |
| <b>Missing</b>               | 1              | 0                 |                                          |                  | 0              |                   |                                          |                  |

CI, confidence interval; CVD, cardiovascular disease; HDL, high density lipoprotein; HR, hazard ratio; TC, total cholesterol; SBP, systolic blood pressure. \*The number of missing information is different for TC/HDL ratio than for TC and HDL separately. This is because the risk factors included in the PREDICT risk assessment (age, gender, smoking, diabetes, systolic BP and total cholesterol/HDL ratio) was compulsory for assessing risk. Risk factors not compulsory for risk assessment consequently have more missing information (e.g. the HDL and TC)

Table A8. Crude rates and age-adjusted HR of CVD by risk factors, European and Indian New Zealand women from the New Zealand cohort.

|                              | European       |                   |                                          |                  | Indian         |                   |                                          |                   |
|------------------------------|----------------|-------------------|------------------------------------------|------------------|----------------|-------------------|------------------------------------------|-------------------|
|                              | No. of persons | No. of CVD events | Crude rate/100 000 person-years (95% CI) | HR               | No. of persons | No. of CVD events | Crude rate/100 000 person-years (95% CI) | HR                |
| <b>Total</b>                 | 49 094         | 757               | 528 (492-567)                            |                  | 7 039          | 106               | 531 (439-643)                            |                   |
| <b>Type 2 diabetes</b>       |                |                   |                                          |                  |                |                   |                                          |                   |
| <b>No</b>                    | 44 880         | 635               | 485 (448-524)                            | 1.00             | 5 010          | 50                | 358 (271-472)                            | 1.00              |
| <b>Yes</b>                   | 4 214          | 122               | 994 (832-1187)                           | 1.93 (1.59-2.35) | 2 029          | 56                | 936 (720-1216)                           | 2.29 (1.55-3.37)  |
| <b>Missing</b>               | 0              |                   |                                          |                  | 0              |                   |                                          |                   |
| <b>SBP</b>                   |                |                   |                                          |                  |                |                   |                                          |                   |
| <b>&lt;140</b>               | 32 178         | 395               | 436 (395-481)                            | 1.00             | 5 370          | 56                | 371 (285-482)                            | 1.00              |
| <b>140-159</b>               | 13 019         | 258               | 646 (572-730)                            | 1.22 (1.04-1.44) | 1 281          | 34                | 919 (656-1286)                           | 2.11 (1.37-3.26)  |
| <b>&gt;160</b>               | 3 896          | 104               | 813 (671-985)                            | 1.42 (1.14-1.77) | 388            | 16                | 1388 (851-2266)                          | 2.99 (1.70-5.27)  |
| <b>Missing</b>               | 1              | 0                 |                                          |                  | 0              |                   |                                          |                   |
| <b>TC/HDL ratio</b>          |                |                   |                                          |                  |                |                   |                                          |                   |
| <b>&lt;5</b>                 | 42 800         | 626               | 507 (469-549)                            | 1.00             | 5 895          | 89                | 527 (428-648)                            | 1.00              |
| <b>≥ 5</b>                   | 6 289          | 131               | 658 (555-781)                            | 1.42 (1.17-1.71) | 1 143          | 17                | 559 (347-898)                            | 1.11 (0.66-1.86)  |
| <b>Missing*</b>              | 5              | 0                 |                                          |                  | 1              | 0                 |                                          |                   |
| <b>TC</b>                    |                |                   |                                          |                  |                |                   |                                          |                   |
| <b>&lt; 5 mmol/L</b>         | 10 940         | 127               | 515 (433-613)                            | 1.00             | 3 277          | 57                | 639 (493-828)                            | 1.00              |
| <b>≥ 5 mmol/L</b>            | 32 974         | 415               | 516 (469-569)                            | 0.96 (0.79-1.17) | 3 515          | 37                | 398 (289-550)                            | 0.62 (0.41-0.94)  |
| <b>Missing*</b>              | 5 180          | 215               | 561 (491-641)                            |                  | 247            | 12                | 689 (391-1212)                           |                   |
| <b>HDL</b>                   |                |                   |                                          |                  |                |                   |                                          |                   |
| <b>&lt; 1.2 mmol/L</b>       | 1 852          | 26                | 529 (360-776)                            | 1.00             | 568            | 9                 | 781 (406-1501)                           | 1.00              |
| <b>≥1.2 mmol/L</b>           | 7 985          | 149               | 578 (492-678)                            | 0.97 (0.64-1.47) | 866            | 14                | 600 (355-1013)                           | 0.75 (0.32-1.77)  |
| <b>Missing*</b>              | 39 257         | 582               | 517 (477-561)                            |                  | 5 605          | 83                | 504 (406-625)                            |                   |
| <b>Current daily smokers</b> |                |                   |                                          |                  |                |                   |                                          |                   |
| <b>No</b>                    | 43 994         | 595               | 466 (430-505)                            | 1.00             | 6 973          | 104               | 526 (434-638)                            | 1.00              |
| <b>Yes</b>                   | 5 100          | 162               | 1038 (890-1211)                          | 2.74 (2.30-3.27) | 66             | 2                 | 1090 (272-4357)                          | 2.60 (0.64-10.59) |
| <b>Missing</b>               | 0              |                   |                                          |                  | 0              |                   |                                          |                   |

CI, confidence interval; CVD, cardiovascular disease; HDL, high density lipoprotein; HR, hazard ratio; TC, total cholesterol; SBP, systolic blood pressure. \*The number of missing information is different for TC/HDL ratio than for TC and HDL separately. This is because the risk factors included in the PREDICT risk assessment (age, gender, smoking, diabetes, systolic BP and total cholesterol/HDL ratio) was compulsory for assessing risk. Risk factors not compulsory for risk assessment consequently have more missing information (e.g. the HDL and TC).

Table A9. Hazard ratios for first **CHD** event in South Asian groups compared to ethnic European groups in New Zealand and Norway.

|                                                          | <b>Men</b>                |                             | <b>Women</b>              |                             |
|----------------------------------------------------------|---------------------------|-----------------------------|---------------------------|-----------------------------|
|                                                          | Indian NZ vs. European NZ | South Asians vs. Norwegians | Indian NZ vs. European NZ | South Asians vs. Norwegians |
| <i>Adjusted for</i>                                      |                           |                             |                           |                             |
| <b>Age</b>                                               | 2.10 (1.79-2.46)          | 2.45 (1.82-3.30)            | 1.60 (1.22-2.10)          | 3.23 (1.95-5.34)            |
| <b>Age, TC/HDL ratio</b>                                 | 2.13 (1.81-2.50)          | 2.04 (1.51-2.76)            | 1.58 (1.20-2.07)          | 2.71 (1.61-4.54)            |
| <b>Age, TC/HDL ratio, diabetes</b>                       | 1.92 (1.63-2.26)          | 1.68 (1.23-2.30)            | 1.31 (0.99-1.74)          | 2.24 (1.30-3.86)            |
| <b>Age, TC/HDL ratio, diabetes, systolic BP</b>          | 2.00 (1.70-2.36)          | 1.81 (1.32-2.48)            | 1.36 (1.02-1.80)          | 2.26 (1.31-3.90)            |
| <b>Age, TC/HDL ratio, diabetes, systolic BP, smoking</b> | 2.07 (1.76-2.44)          | 1.86 (1.36-2.55)            | 1.60 (1.20-2.13)          | 2.84 (1.61-5.03)            |

HDL, high density lipoprotein; NZ, New Zealand; SBP, systolic blood pressure; TC, Total cholesterol.

All had complete information on the risk factors
